# Supplementary material for: An evolutionary system of mineralogy, Part VIII: The evolution of metamorphic minerals
Source: publisher site journal article supplement (doi:10.2138/am-2023-9004), 2024-02-07
Supplement: Supplementary file 1 [file 9004_supp_Figure S1 Read Me File.pdf › am-2023-9004_sm/9004_supp_Figure S1 Read Me File.pdf]

## **Supplementary Read-Me File: Instructions for Interactive Figure S1**

### **An evolutionary system of mineralogy, Part VIII: The evolution of the metamorphic minerals**

**SHAUNNA M. MORRISON, ANIRUDH PRABHU, AND ROBERT M. HAZEN**

Interactive Figure 1 is a unipartite network of the co-occurrences among 73 common metamorphic minerals. The figure is accessed through the following site:

<https://observablehq.com/@anirudhprabhu/revised-evolutionary-system-of-mineralogy-part-8-uni>

#### **Revised Evolutionary System of Mineralogy Part 8 Unipartite Network with 73 Minerals**

Version Date: Dec 10, 2023  
Percent Weights

#### **Full Network**

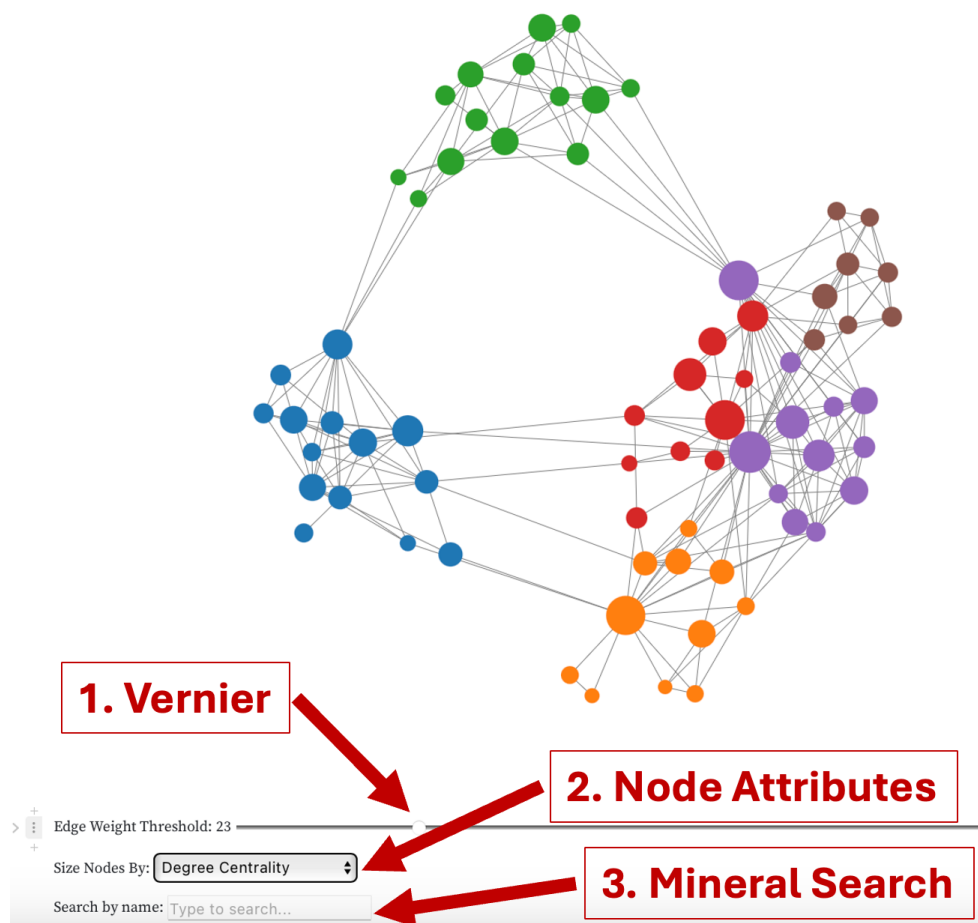

This network displays 73 common metamorphic minerals (colored circles), with links between pairs of coexisting minerals. Node sizes indicate the relative abundances of the minerals, while colors indicate 6 communities of metamorphic minerals that were determined using Louvain community detection. Each of these communities corresponds to a different temperature-pressure-composition regime. In this figure, links are drawn between two minerals based on the percentage of rocks incorporating the less common mineral that also incorporate the more common mineral (as tabulated in Supplementary Table 3).

You can vary this percentage ( $P$ ) by using your cursor to move the “Weight Threshold” vernier to systematically eliminate links between nodes based on  $P$  values. Note that at  $P > 6\%$  some mineral nodes will detach from the network, leaving a smaller and sparser network.

In addition, you can:

- (1) search for a mineral by typing the name in the “Search by Name” box;
- (2) hover your cursor over any node to identify the corresponding mineral;
- (3) click node to view its direct connections in the network;
- (4) click and hold your cursor to move that node and identify links to other nodes; and
- (5) adjust node attributes by clicking on the “Size Nodes By” feature.
