# Supplementary material for: An evolutionary system of mineralogy, Part VIII: The evolution of metamorphic minerals
Source: publisher site journal article supplement (doi:10.2138/am-2023-9004), 2024-02-07
Supplement: Supplementary file 4 [file 9004_supp_Table 3 Read Me File.pdf › am-2023-9004_sm/9004_supp_Table 3 Read Me File.pdf]

## **Supplementary Read-Me File: Instructions for Supplementary Table 3**

### **An evolutionary system of mineralogy, Part VIII: The evolution of the metamorphic minerals**

**SHAUNNA M. MORRISON, ANIRUDH PRABHU, AND ROBERT M. HAZEN**

Supplementary Table 3 is an xlsx file that tabulates the occurrences of 94 of the most common metamorphic minerals (Columns F to CU), as recorded in modal information for 2785 varied metamorphic rocks (Rows 3 to 2787) from several references (see below).

Column A, Rows 3 to 2787 provides the source of information for each rock, as follows:

- “Augustithus, 1-4” indicates Figures 1 to 4 on pages 149-150 in Augustithus (1985). [156 rocks]
- “Botha, 103” indicates page 103 of Botha (1983). [95 rocks]
- “C&C, 152” indicates page 152 of Carswell and Compagnoni (2003). [49 rocks]
- “Carswell 178” indicates page 178 of Carswell (1990). [198 rocks]
- “Coleman-Table 1” indicates Table 1 in Coleman et al. (1965). [13 rocks]
- “Grapes, 118” indicates page 118 of Grapes (2006). [218 rocks]
- “H-Meta, 110A” indicates Figure 43A on page 110 of Harker (1950). [285 rocks]
- “Harker, 255A” indicates Figure 124A on page 255 of Tilley et al. (1964). [50 rocks]
- “Harley-2021-530” indicates page 530 of Harley (2021). [121 rocks]
- “Joplin, 64-2” indicates the second mode listed on page 64 of Joplin (1968). [345 rocks]
- “P&A, 421A” indicates Figure 16.7A on page 421 of Philpotts and Ague (2009). [71 rocks]
- “R&S, 100” indicates page 100 of Reverdatto and Sobolev (1973). [885 rocks]

In addition, 299 rocks were extracted from contributions by Ferry and colleagues (Davis and Ferry 1983; Ferry 1976, 1984, 1988, 1989, 1992, 1994, 1995, 1996, 2007; Ferry and Rumble 1997; Ferry et al. 1987, 2001, 2002, 2005; Léger and Ferry 1993; Penniston-Dorland and Ferry 2006).

Column B indicates the given name and locality of the metamorphic rock.

Column C indicates the facies of the metamorphic rock, with abbreviations, as follows: AEhn = albite-epidote hornfels; Amph = amphibolite facies; Blue = blueschist facies; Eclo = eclogite facies; Gran = granulite facies; Gree = greenschist facies; HbHn = hornblende hornfels; MuHn = muscovite hornfels; PP = prehnite-pumpellyite facies; PyHn = pyroxene hornfels; San = sanidinite facies; UHP = ultra-high-pressure facies; Zeol = zeolite facies.

Column D assigns a code to each rock type, most of which are based on paragenetic modes in Hazen and Morrison (2022). Abbreviations indicate: BAM = metamorphosed barium/manganese deposit; CON = contact metamorphism; HPM = high-pressure metamorphism; MET = metasomatized; OPH = ophiolite; REG = regional metamorphism; SHE = shear zone metamorphism; XEN = pyrometamorphosed xenolith. See text for more details.

Column E indicates the presumed protolith of the metamorphic rock, as follows: ACI = acidic volcanics; AGP = agpaitic rocks; ALM = almandine; BAU = bauxite; BFE = banded iron formation; BIO = biotite; CAR = carbonate; CHL = chlorite; CHR = chromitite; CHT = chert; COR = cordierite; CSI = calc-silicate; FEB = iron-manganese-barium deposit; FEM = iron-manganese deposit; FET = iron-titanium deposit; GRE = pyrometamorphism of greenschist facies protolith; HNB = hornblende; INT = intermediate igneous; LAT = laterite; MAF = mafic igneous rock; MUS = muscovite; PEL = pelite; REG = pyrometamorphism of regional metamorphic protolith; SST = sandstone; STA = staurolite; SUB = subsilicic igneous rock (e.g., nepheline syenite); UMA = ultramafic igneous rock; ZEO = pyrometamorphism of zeolite facies protolith.

Columns F to CU denote 94 of the most common metamorphic mineral kinds, arranged alphabetically.

Row 1 indicates the names of the mineral kinds in Columns F to CU.

Row 2 indicates the total number of occurrences of the minerals in Columns F to CU.

Rows 3 to 2787 record whether a mineral in Columns F to CU is present in the corresponding rock. A blank indicates that the mineral was not recorded in that rock.

### References

- Augustithis, S.S. (1985) Atlas of the Textural Patterns of Metamorphosed (Transformed and Deformed) Rocks and their Genetic Significance. Theophrastus Publications.
- Botha, B.J.V. [Editor] (1983) Namaqualand Metamorphic Complex. The Geological Society of South Africa.
- Carswell, D.A. [Editor] (1990) Eclogite Facies Rocks. Chapman and Hall.
- Carswell, D.A., and Compagnoni, R. [Editors] (2003) Ultrahigh Pressure Metamorphism. European Mineralogical Union Notes in Mineralogy, 5.
- Coleman, R.G., Lee, D.E., Beatty, L.B., and Brannock, W.W. (1965) Eclogites and eclogites: Their differences and similarities. Geological Society of America Bulletin, 76, 483-508.
- Davis, S.R., and Ferry, J.M. (1993) Fluid infiltration during contact metamorphism of interbedded marble and calc-silicate hornfels, Twin Lakes area, central Sierra Nevada, California. Journal of Metamorphic Petrology, 11, 71-88.
- Grapes, R. (2006) Pyrometamorphism. Second Edition. Springer.
- Ferry, J.M. (1976)  $P$ ,  $T$ ,  $f_{\text{CO}_2}$  and  $f_{\text{H}_2\text{O}}$  during metamorphism of calcareous sediments in the Waterville-Vassalboro area, south-central Maine. Contributions to Mineralogy and Petrology, 57, 119-143.
- Ferry, J.M. (1984) A biotite isograd in South-Central Maine, U.S.A.: Mineral reactions, fluid transfer, and heat transfer. Journal of Petrology, 25, 871-893.
- Ferry, J.M. (1988) Infiltration-driven metamorphism in Northern New England, USA. Journal of Petrology, 29, 1121-1159.
- Ferry, J.M. (1989) Contact metamorphism of roof pendants at Hope Valley, Alpine County, California, USA. Contributions to Mineralogy and Petrology, 101, 402-417.

- Ferry, J.M. (1992) Regional metamorphism of the Waits River Formation, eastern Vermont: Delineation of a new type of giant metamorphic hydrothermal system. *Journal of Petrology*, 33, 45-94.
- Ferry, J.M. (1994) Overview of the petrologic record of fluid flow during regional metamorphism in northern New England. *American Journal of Science*, 294, 905-988.
- Ferry, J.M. (1995) Fluid flow during contact metamorphism of ophiocarbonate rocks in the Bergell Aureole, Val Malenco, Italian Alps. *Journal of Petrology*, 36, 1039-1053.
- Ferry, J.M. (1996) Prograde and retrograde fluid flow during contact metamorphism of siliceous carbonate rocks from the Ballachulish aureole, Scotland. *Contributions to Mineralogy and Petrology*, 124, 235-254.
- Ferry, J.M. (2007) The role of volatile transport by diffusion and dispersion in driving biotite-forming reactions during regional metamorphism of the Gile Mountain Formation, Vermont. *American Mineralogist*, 92, 1288-1302.
- Ferry, J.M., and Rumble III, D. (1997) Formation and destruction of periclase by fluid flow in two contact aureoles. *Contributions to Mineralogy and Petrology*, 128, 313-334.
- Ferry, J.M., Mutti, L.J., and Zuccala, G.J. (1987) Contact metamorphism/hydrothermal alteration of Tertiary basalts from the Isle of Skye, northwest Scotland. *Contributions to Mineralogy and Petrology*, 95, 166-181.
- Ferry, J.M., Wing, B.A., and Rumble III, D. (2001) Formation of wollastonite by chemically reactive fluid flow during contact metamorphism, Mt. Morrison Pendant, Sierra Nevada, California, USA. *Journal of Petrology*, 42, 1705-1728.
- Ferry, J.M., Wing, B.A., Penniston-Dorland, S.C., and Rumble II, D. (2002) Direction of fluid flow during contact metamorphism of siliceous carbonate rocks: New data for the Monzoni and Predazzo aureoles, northern Italy, and a global review. *Contributions to Mineralogy and Petrology*, 142, 679-699.
- Ferry, J.M., Rumble III, D., Wing, B.A., and Penniston-Dorland, S.C. (2005) A new interpretation of centimeter-scale variations in the progress of infiltration-driven metamorphic reactions: Case study of carbonated metaperidotite, Val d'Efra, Central Alps, Switzerland. *Journal of Petrology*, 46, 1725-1746.
- Ferry, J.M., Stubbs, J.E., Xu, H., Guan, Y., and Eiler, J.M. (2015) ankerite grains with dolomite cores: A diffusion chronometer for low- to medium-grade regionally metamorphosed clastic sediments. *American Mineralogist*, 100, 2443-2457.
- Harker, A. (1950) *Metamorphism: A Study of the Transformations of Rock-Masses*. E. P. Dutton & Co.
- Hazen, R.M., and Morrison, S.M. (2022) On the paragenetic modes of minerals: A mineral evolution perspective. *American Mineralogist*, 107, 1262-1287.
- Joplin, G.A. (1968) *A Petrography of Australian Metamorphic Rocks*. American Elsevier Publishing Company.
- Léger, A., and Ferry, J.M. (1993) Fluid infiltration and regional metamorphism of the Waits River Formation, north-east Vermont, USA. *Journal of Metamorphic Geology*, 11, 3-29.
- Penniston-Dorland, S.C., and Ferry, J.M. (2006) Development of spatial variations in reaction progress during regional metamorphism of micaceous carbonate rocks, northern New England. *American Journal of Science*, 306, 475-524.

- Philpotts, A.R., and Ague, J.J. (2009) Principles of Igneous and Metamorphic Petrology. Second Edition. Cambridge University Press.
- Reverdatto, V.V., and Sóbolev, V.S. (1973) The Facies of Contact Metamorphism. Translated by D.A. Brown. Australian National University.
- Tilley, C.E., Nockolds, S.R., and Black, M. (1964) Harker's Petrology for Students, Eighth Edition. Cambridge University Press.
