# Supplementary material for: An evolutionary system of mineralogy, Part VIII: The evolution of metamorphic minerals
Source: publisher site journal article supplement (doi:10.2138/am-2023-9004), 2024-02-07
Supplement: Supplementary file 5 [file 9004_supp_Table 3.xlsx]

## Sheet: Sheet1
American Mineralogist: October 2024 Online Materials AM-24-109004
Morrison et al.: Evolutionary system Part VIII: metamorphic minerals
AA-Rock Reference	AAA-Rock Name	Facies	Para Mode	Protolith	Actinolite	Aegirine	Albite	Allanite	Almandine	Andalusite	Andradite	Anorthite	Anthophyllite	Apatite	Aragonite	Augite	Baddeleyite	Biotite	Brucite	Calcite	Chalcopyrite	Chlorite	Chloritoid	Chromite	Coesite	Cordierite	Corundum	Cristobalite	Cummingtonite	Diamond	Diopside	Dolomite	Fe-Dolomite	Epidote	Fayalite	Forsterite	Ol(30-70)	Geikielite	Glaucophane	Graphite	Grossular	Hedenbergite	Hematite	Hercynite	Hornblende	Humite	Ilmenite	Jadeite	Kspar
AAA-Number	XXX	XXX	XXX	XXX	74	16	177	16	367	146	28	78	52	155	15	150	18	822	31	645	99	339	46	12	23	395	85	10	12	10	409	152	116	157	10	173	53	17	79	105	162	16	24	34	387	21	181	34	411
Augustithus, 001-004	Oolitic limestone, Greece	Zeol	REG	CAR
Augustithus, 005-008	Quartzite, various	Zeol	REG	SST																		1																											1
Augustithus, 005-008	Quartzite, various	Zeol	REG	SST
Augustithus, 011-014	Quartzite, Jangxi, China	MuHn	CON	SST														1		1
Augustithus, 015	Quartzite, Jangxi, China	MuHn	CON	SST
Augustithus, 018-020	Skarn, Greece (Hydrothermal contact origin)	MuHn	CON	CAR																1																						1
Augustithus, 022-023	Peridotite xenolith in ophiolite	Amph	XEN	UMA																											1						1
Augustithus, 035-039	Quartzite, Ethiopia	MuHn	CON	SST																																													1
Augustithus, 040-052	Marble, various	MuHn	CON	CAR
Augustithus, 057	Quartz-feldspar symplectite	MuHn	CON	SST														1
Augustithus, 058-061	Quartz-feldspar symplectite	MuHn	CON	SST																																													1
Augustithus, 062-065	Quartz-feldspar symplectite	MuHn	CON	SST					1																																				1
Augustithus, 066	Quartz-feldspar symplectite	MuHn	CON	SST					1											1
Augustithus, 067-073	Quartz-feldspar symplectite, Various	MuHn	CON	SST																																													1
Augustithus, 074-075	Chlorite-anthophyllite, Various	MuHn	CON	SST									1
Augustithus, 076-078	Talc-anthophyllite, India	MuHn	CON	PEL									1
Augustithus, 079-080	Talc-anthophyllite-calcite, Alps	MuHn	CON	CSI									1
Augustithus, 081	Hornblende-Hornfels Facies, France	HbHn	CON	PEL					1																																				1
Augustithus, 082	Hornblende-Hornfels Facies, Switzerland	HbHn	CON	PEL																		1																							1
Augustithus, 083	Hornblende-Hornfels Facies, Austria	HbHn	CON	PEL														1																											1
Augustithus, 084	Hornblende-Hornfels Facies, Schlesian	HbHn	CON	PEL														1		1																									1
Augustithus, 085	Hornblende-Hornfels Facies, Black Hills	HbHn	CON	PEL																																									1
Augustithus, 086	Hornblende-Hornfels Facies, Hungary	HbHn	CON	PEL																																									1
Augustithus, 087	Hornblende-Hornfels Facies, Vermont	HbHn	CON	PEL																																									1
Augustithus, 091	Hornblende-Hornfels Facies, Germany	HbHn	CON	PEL					1																																				1
Augustithus, 095-097	Tremolite schist, Italy	HbHn	CON	UMA																																1
Augustithus, 103-105	Andalusite schist, Saxony	HbHn	CON	PEL						1								1				1
Augustithus, 106-107	Antigorite marble, Alps	HbHn	CON	CAR
Augustithus, 108	Antigorite marble, Italy	HbHn	CON	CAR
Augustithus, 112-121	Sericite schist, various	MuHn	REG	PEL
Augustithus, 125-126	Lime mica schist, Saxony	MuHn	REG	CSI																1
Augustithus, 131	Chloritoid schist, Greece	MuHn	REG	PEL																1			1
Augustithus, 132	Chloritoid schist, Italy	MuHn	REG	PEL																			1
Augustithus, 133	Chloritoid schist, Germany	Amph	REG	PEL																			1																		1
Augustithus, 134	Chloritoid schist, England	Amph	REG	PEL																1			1			1
Augustithus, 135	Cordierite schist, Saxony	Amph	REG	PEL														1								1
Augustithus, 136	Cordierite schist, Germany	Amph	REG	PEL														1								1																			1
Augustithus, 137	Cordierite schist, Saxony	Amph	REG	PEL														1								1																			1
Augustithus, 138	Cordierite schist, Saxony	Amph	REG	PEL																						1																			1
Augustithus, 139-140	Staurolite schist, Scotland	Amph	REG	PEL														1								1
Augustithus, 141/143	Cordierite schist, Germany	Amph	REG	PEL														1								1
Augustithus, 142	Cordierite schist, Germany	Amph	REG	PEL														1								1																			1
Augustithus, 144-145	Corundum marble, Greece	Amph	REG	PEL
Augustithus, 146	Epidote schist, Germany	Amph	REG	PEL					1																									1
Augustithus, 147	Epidote schist, Germany	Amph	REG	PEL																														1
Augustithus, 148/150	Epidote schist, switzerland	Amph	REG	PEL														1																1
Augustithus, 149	Epidote schist, Greece	Amph	REG	PEL																1							1							1
Augustithus, 151	Epidote schist, Sardinia	Amph	REG	PEL																														1
Augustithus, 156-159	Perthite quartzite, Various	Amph	REG	PEL																																													1
Augustithus, 160	Mica schist, Nova Scotia	Amph	REG	PEL																1																													1
Augustithus, 165-166	Hornblendite, Various	Amph	REG	PEL																																									1
Augustithus, 167	Skarn, Germany	Amph	REG	PEL																											1
Augustithus, 168	Skarn, Canada	Amph	REG	PEL																																					1				1
Augustithus, 169	Hornblendite, Scotland	Amph	REG	PEL					1									1
Augustithus, 170	Mica schist, Germany	Amph	REG	PEL					1
Augustithus, 171-172	Quartzite, Scotlan	Amph	REG	SST					1									1		1
Augustithus, 173-174	Hornblende schist, Scotland	Amph	REG	PEL					1																																								1
Augustithus, 175	Gneiss mica schist, Germany	Amph	REG	PEL					1																																								1
Augustithus, 176	Garnet gabbro, India	Amph	REG	PEL							1																																		1
Augustithus, 179	Amphibolite, France	Amph	REG	PEL					1																																				1
Augustithus, 181	Amphibolite, Germany	Amph	REG	PEL					1																																				1
Augustithus, 182	Amphibolite, Germany	Amph	REG	PEL					1																																				1
Augustithus, 186	Chromite/uvarovite, South Africa	Amph	REG	UMA
Augustithus, 187	Chromite/uvarovite, South Africa	Amph	REG	UMA
Augustithus, 202-204	Garnet mica schist, Various	Amph	REG	PEL					1
Augustithus, 214-217	Glaucophane Gneiss, Italy	Blue	HPM	PEL														1																					1
Augustithus, 220-221	Graphite Gneiss, Germany	Amph	REG	PEL																																				1
Augustithus, 223	Graphite Gneiss, Germany	Amph	REG	PEL																											1									1
Augustithus, 224	Graphite Gneiss, Germany	Amph	REG	PEL																																				1
Augustithus, 225	Mica schist, Germany	Amph	REG	PEL														1		1
Augustithus, 227	Kyanite granulite, Germany	Gran	REG	PEL														1		1
Augustithus, 228	Kyanite Gneiss, Bohemia	Amph	REG	PEL
Augustithus, 230	Kyanite granulite, Germany	Gran	REG	PEL
Augustithus, 231	Blue Schist Zone, Greece	Blue	HPM	PEL																																			1
Augustithus, 232	Mica schist, USSR	Amph	REG	PEL
Augustithus, 233	Staurolite schist, Tirol	Amph	REG	PEL
Augustithus, 234	Metasomatized Marble, Italy	Amph	REG	CAR																																1
Augustithus, 235	Olivine Tremolitefels, Italy	Amph	REG	UMA																																1
Augustithus, 237	Pumpellyite rock, Greece	PP	REG	PEL			1													1
Augustithus, 239	Plagioclase Olivinefels, Greenland	Amph	REG	INT												1																					1
Augustithus, 240-242	Marble, various	Amph	CON	CAR																		1									1
Augustithus, 243	Marble, Italy	Amph	CON	CAR																											1
Augustithus, 244	Augist Schist, India	Amph	REG	MAF					1							1				1
Augustithus, 248	Ecologite, Germany	Eclo	HPM	MAF																1																									1
Augustithus, 252	Anorthosite, Canada	Amph	REG	INT
Augustithus, 254	Ultramafic, Greece	Amph	REG	UMA																											1					1
Augustithus, 255	Scapolite marble, Greece	Amph	REG	CAR																											1
Augustithus, 256	Scapolite marble, Greece	Amph	REG	CAR																											1
Augustithus, 257-258	Granite, Ethiopia	Amph	REG	ACI														1		1																													1
Augustithus, 259	Sillimanite-Garnet Gneiss, Italy	Amph	REG	PEL					1									1		1
Augustithus, 260	Sillimanite-Garnet Gneiss, Italy	Amph	REG	PEL														1
Augustithus, 261	Sillimanite-Garnet Gneiss, Italy	Amph	REG	PEL														1																															1
Augustithus, 262	Sillimanite-Garnet Gneiss, Italy	Amph	REG	PEL					1									1
Augustithus, 263-266	Sillimanite-Garnet Gneiss, Various	Amph	REG	PEL
Augustithus, 267-269	Sillimanite-Garnet Gneiss, Various	Amph	REG	PEL														1
Augustithus, 271/273	Sillimanite-Garnet Gneiss, Italy	Amph	REG	PEL					1
Augustithus, 272	Sillimanite-Garnet Gneiss, Italy	Amph	REG	PEL					1																																								1
Augustithus, 274	Titanite-bearing Schist, Germany	Amph	REG	PEL																																									1
Augustithus, 275-277	Staurolite schist, Various	Amph	REG	PEL
Augustithus, 278-279	Staurolite-Mica Schist, Various	Amph	REG	PEL														1
Augustithus, 281-282	Stauolite Gneiss, Various	Amph	REG	PEL					1									1
Augustithus, 283	Mica schist, Germany	Amph	REG	PEL
Augustithus, 284	Staurolite-Mica Schist, Spain	Amph	REG	PEL
Augustithus, 285	Staurolite-Mica Schist, Spain	Amph	REG	PEL														1
Augustithus, 293	Stilpnomelane Schist, Greece	Blue	HPM	MAF																																						1
Augustithus, 294	Stilpnomelane Schist, Greece	Blue	HPM	MAF																																						1
Augustithus, 295	Tourmalinite, Wales	Amph	REG	PEL
Augustithus, 296	Marble, Scotland	Amph	REG	CAR
Augustithus, 308	Mica schist, South Africa	Amph	REG	PEL					1	1								1
Augustithus, 316	Biotite Gneiss, Tennessee	Amph	REG	PEL					1									1		1
Augustithus, 322	Hornblende Syenit, Germany	Amph	REG	PEL														1																											1				1
Augustithus, 325-326	Anorthosite, Angola	Amph	REG	INT																																	1
Augustithus, 329-330	Granophyre, India	Amph	REG	ACI																											1																		1
Augustithus, 338	Metabasite, Ethiopia	HbHn	REG	UMA																																1
Augustithus, 341-342	Metaperidotite, East Siberia	HbHn	REG	UMA																											1					1
Augustithus, 388	Chromite Ore, Greece	HbHn	REG	UMA
Augustithus, 389	Sillimanite Gneiss, Scotland	HbHn	REG	PEL					1
Augustithus, 395	Mica schist, USSR	HbHn	REG	PEL														1
Augustithus, 400	Quartzite, Switzerland	HbHn	REG	SST
Augustithus, 401-403	Quartzite, Saxony	HbHn	REG	SST														1
Augustithus, 409	Metagranite, Argentina	HbHn	REG	ACI																																													1
Augustithus, 410	Sillimanite Gneiss, Scotland	HbHn	REG	PEL					1
Augustithus, 419	Metaanorthosite, South Africa	HbHn	REG	INT																											1
Augustithus, 423-425	Graphite phyllite, Italy	HbHn	REG	CSI																																				1
Augustithus, 426	Chlorite Schist, Germany	HbHn	REG	PEL																		1
Augustithus, 439	Biotite Gneiss, Germany	HbHn	REG	PEL														1
Augustithus, 449	Blue Schist Zone, Greece	Blue	REG	PEL					1																																				1
Augustithus, 450/456	Glaucophane Schist, Greece	Blue	REG	PEL					1																									1					1						1
Augustithus, 451-455	Glaucophane Schist, Greece	Blue	REG	PEL					1																														1						1
Augustithus, 465-469	Glaucophane Schist, Various	Blue	REG	PEL					1																														1
Augustithus, 475-480	Granitized conglomerate, Ethiopia	HbHn	REG	SST																																													1
Augustithus, 481	Metagranite, SE China	HbHn	REG	SST																																													1
Augustithus, 494-496	Charnockite, Norway	Gran	HPM	PEL																																													1
Augustithus, 497-498	Charnockite, Norway	Gran	HPM	PEL														1																															1
Augustithus, 499-502	Charnockite, India	Gran	HPM	PEL														1																															1
Augustithus, 503-504	Charnockite, India	Gran	HPM	PEL														1
Augustithus, 505-506	Charnockite, India	Gran	HPM	PEL										1																									1
Augustithus, 507	Charnockite, India	Gran	HPM	PEL																																													1
Augustithus, 508	Charnockite, India	Gran	HPM	PEL																											1
Augustithus, 515-518	Pyroxene-Garnet Granulite, India	Gran	HPM	PEL					1																																				1
Augustithus, 525	Hedenbergite Schist, Greece	Gran	HPM	PEL							1																															1
Augustithus, 526-529	Metagabbro, India	HbHn	REG	MAF							1
Augustithus, 530-532	Ecologite, India	Eclo	HPM	MAF
Augustithus, 533	Ecologite, Italy	Eclo	HPM	MAF																																			1
Augustithus, 534-537	Ecologite, Germany	Eclo	HPM	MAF																																			1						1
Augustithus, 535	Hyprsthene Ecologite, Germany	Eclo	HPM	MAF																																									1
Augustithus, 538	Hyprsthene Ecologite, Germany	Eclo	HPM	MAF														1
Augustithus, 542-545	Paragabbro, Greenland	HbHn	REG	UMA																																	1
Augustithus, p.76	Tilley: Honfels Types, sub-silicic	HbHn	REG	PEL																						1
Augustithus, p.76	Tilley: Honfels Types, sub-silicic	HbHn	REG	PEL								1														1
Augustithus, p.76	Tilley: Honfels Types, sub-silicic	HbHn	REG	PEL																						1	1
Augustithus, p.76	Tilley: Honfels Types, sub-silicic	HbHn	REG	PEL																						1
Augustithus, p.76	Tilley: Honfels Types, sub-silicic	HbHn	REG	PEL																							1
Augustithus, p.76	Tilley: Honfels Types, sub-silicic	HbHn	REG	PEL						1		1														1	1
Augustithus, p.76	Tilley: Honfels Types, sub-silicic	HbHn	REG	PEL						1																1	1
Augustithus, p.76	Tilley: Honfels Types, sub-silicic	HbHn	REG	PEL						1		1															1
Botha, 016	Namaqualand Meta Complex; mafic lens	Amph	REG	MAF						1								1				1				1
Botha, 016	Namaqualand Meta Complex; sillimanite schist	Amph	REG	PEL														1
Botha, 016	Namaqualand Meta Complex; sillimanite schist	Amph	REG	PEL
Botha, 016	Namaqualand Meta Complex; sillimanite schist	Amph	REG	PEL						1								1				1				1
Botha, 016	Namaqualand Meta Complex; Cordierite schist	Amph	REG	INT						1								1								1
Botha, 016	Namaqualand Meta Complex; sillimanite schist	Amph	REG	PEL					1	1								1								1
Botha, 016	Namaqualand Meta Complex; sillimanite schist	Amph	REG	PEL						1																1
Botha, 016	Namaqualand Meta Complex; metavolcanics	Gree	REG	INT	1		1											1				1												1
Botha, 016	Namaqualand Meta Complex; metapelite	Amph	REG	PEL					1									1								1
Botha, 016	Namaqualand Meta Complex; metapelite	Amph	REG	PEL					1				1													1
Botha, 016	Namaqualand Meta Complex; shear zone	Gree	SHE	INT
Botha, 017	Namaqualand Meta Complex; metapelite	Amph	REG	PEL
Botha, 017	Namaqualand Meta Complex; metapelite	Amph	REG	PEL																																													1
Botha, 018	Namaqualand Meta Complex; metapelite	Amph	REG	PEL																																													1
Botha, 018	Namaqualand Meta Complex; metapelite	Amph	REG	PEL																						1
Botha, 018	Namaqualand Meta Complex; metapelite	Amph	REG	PEL																						1
Botha, 018	Namaqualand Meta Complex; metapelite	Amph	REG	PEL																																									1
Botha, 036	Namaqualand Meta Complex; gneiss	Amph	REG	PEL			1											1																															1
Botha, 037	Namaqualand Meta Complex; gneiss	Amph	REG	CSI																																									1				1
Botha, 037	Namaqualand Meta Complex; metagranite	Amph	REG	ACI			1											1																															1
Botha, 038	Namaqualand Meta Complex; metadiorite	Amph	REG	INT														1																											1				1
Botha, 038	Namaqualand Meta Complex; metagranite	Amph	REG	ACI			1											1																											1				1
Botha, 039	Namaqualand Meta Complex; gneiss	Amph	REG	INT														1																															1
Botha, 039	Namaqualand Meta Complex; gneiss	Amph	REG	INT														1
Botha, 039	Namaqualand Meta Complex; gneiss	Amph	REG	INT														1																															1
Botha, 039	Namaqualand Meta Complex; gneiss	Amph	REG	PEL					1				1					1
Botha, 073	Namaqualand Meta Complex; amphibolite	Amph	REG	MAF														1																											1
Botha, 084	Namaqualand Meta Complex; granite gneiss	Amph	REG	ACI					1																																				1				1
Botha, 084	Namaqualand Meta Complex; granite gneiss	Amph	REG	ACI														1																											1				1
Botha, 084	Namaqualand Meta Complex; granite gneiss	Amph	REG	ACI														1																															1
Botha, 084	Namaqualand Meta Complex; granite gneiss	Amph	REG	ACI														1																															1
Botha, 084	Namaqualand Meta Complex; granite gneiss	Amph	REG	ACI			1		1									1																															1
Botha, 084	Namaqualand Meta Complex; metapelite	Amph	REG	PEL			1		1									1																															1
Botha, 103	Namaqualand Meta Complex; muscovite schist	Amph	REG	PEL														1
Botha, 103	Namaqualand Meta Complex; meta banded iron	Amph	REG	BFE																																							1
Botha, 104	Namaqualand Meta Complex; muscovite schist	Amph	REG	PEL														1
Botha, 105	Namaqualand Meta Complex; muscovite schist	Amph	REG	PEL														1
Botha, 105	Namaqualand Meta Complex; muscovite schist	Amph	REG	PEL														1
Botha, 105	Namaqualand Meta Complex; meta banded iron	Amph	REG	BFE										1				1																									1
Botha, 105	Namaqualand Meta Complex; metaquartzite	Amph	REG	SST														1
Botha, 105	Namaqualand Meta Complex; calcic metaquartz.	Amph	REG	CSI										1																	1			1											1				1
Botha, 105	Namaqualand Meta Complex; meta banded iron	Amph	REG	BFE																																							1
Botha, 105	Namaqualand Meta Complex; biotite schist	Amph	REG	PEL					1									1
Botha, 105	Namaqualand Meta Complex; biotite gneiss	Amph	REG	PEL														1																											1
Botha, 106	Namaqualand Meta Complex; metapelite	Amph	REG	PEL														1
Botha, 106	Namaqualand Meta Complex; metapelite	Amph	REG	PEL
Botha, 109	Namaqualand Meta Complex; meta banded iron	Amph	REG	BFE
Botha, 149	Namaqualand Meta Complex; calc silicate	Amph	REG	CSI							1																							1
Botha, 152	Namaqualand Meta Complex; kinzigite	Gran	CON	PEL					1																	1
Botha, 152	Namaqualand Meta Complex; charnockite	Gran	REG	MAF												1
Botha, 153	Namaqualand Meta Complex; metapelite	Amph	REG	PEL																		1																							1
Botha, 153	Namaqualand Meta Complex; metapelite	Amph	REG	PEL																		1
Botha, 153	Namaqualand Meta Complex; contact meta	HbHn	CON	PEL					1									1
Botha, 153	Namaqualand Meta Complex; metapelite	Amph	REG	PEL			1															1												1
Botha, 153	Namaqualand Meta Complex; metapelite	Amph	REG	PEL																		1												1
Botha, 153	Namaqualand Meta Complex; metapelite	Amph	REG	PEL																		1												1
Botha, 153	Namaqualand Meta Complex; metapelite	Amph	REG	PEL														1				1
Botha, 153	Namaqualand Meta Complex; metapelite	Amph	REG	PEL					1									1
Botha, 153	Namaqualand Meta Complex; contact meta	HbHn	CON	PEL							1									1											1						1
Botha, 153	Namaqualand Meta Complex; calc silicate	Amph	REG	CSI																1											1										1
Botha, 153	Namaqualand Meta Complex; calc silicate	Amph	REG	CSI																											1			1							1								1
Botha, 153	Namaqualand Meta Complex; meta basite	Amph	REG	MAF					1									1																											1
Botha, 153	Namaqualand Meta Complex; meta basite	Amph	REG	MAF					1																																				1
Botha, 153	Namaqualand Meta Complex; meta basite	Amph	REG	MAF					1																																				1
Botha, 153	Namaqualand Meta Complex; meta basite	Amph	REG	MAF																																									1
Botha, 153	Namaqualand Meta Complex; contact meta	HbHn	CON	PEL					1									1								1																							1
Botha, 153	Namaqualand Meta Complex; metapelite	Amph	REG	PEL					1									1								1																							1
Botha, 153	Namaqualand Meta Complex; metapelite	Amph	REG	PEL					1									1																											1				1
Botha, 153	Namaqualand Meta Complex; contact meta	HbHn	CON	PEL					1									1								1																							1
Botha, 153	Namaqualand Meta Complex; metapelite	Amph	REG	PEL					1									1																															1
Botha, 153	Namaqualand Meta Complex; metapelite	Amph	REG	PEL					1
Botha, 153	Namaqualand Meta Complex; meta basite	Amph	REG	MAF	1																	1												1
Botha, 153	Namaqualand Meta Complex; metapelite	Amph	REG	PEL					1									1								1
Botha, 154	Namaqualand Meta Complex; meta basite	Amph	REG	MAF														1																1											1
Botha, 154	Namaqualand Meta Complex; meta basite	Amph	REG	MAF														1																											1
Botha, 160	Namaqualand Meta Complex; shear zone	Amph	SHE	PEL			1
Botha, 168-.	Namaqualand Meta Complex; mafic	Amph	REG	MAF					1																																				1
Botha, 168-*	Namaqualand Meta Complex; mafic	Amph	REG	MAF												1																													1
Botha, 168-+	Namaqualand Meta Complex; metapelite	Amph	REG	PEL														1				1
Botha, 168-+-	Namaqualand Meta Complex; mafic	Gran	REG	PEL					1									1								1																							1
Botha, 168-C	Namaqualand Meta Complex; metapelite	Amph	REG	PEL					1																	1																							1
Botha, 168-D	Namaqualand Meta Complex; Calc-silicae	Amph	REG	CSI								1								1											1										1
Botha, 168-K	Namaqualand Meta Complex; quartzite	Amph	REG	SST																		1
Botha, 168-O	Namaqualand Meta Complex; metapelite	Amph	REG	PEL					1									1
Botha, 168-O-DOT	Namaqualand Meta Complex; mafic	Amph	REG	MAF																														1											1
Botha, 168-S	Namaqualand Meta Complex; metapelite	Amph	REG	PEL					1									1								1																							1
Botha, 168-ST	Namaqualand Meta Complex; metapelite	Amph	REG	PEL					1
Botha, 168-TRI	Namaqualand Meta Complex; metapelite	Amph	REG	PEL														1																											1				1
Botha, 168-X	Namaqualand Meta Complex; metapelite	Amph	REG	PEL																		1
Botha, 168-X	Namaqualand Meta Complex; mafic	Amph	REG	MAF	1		1															1												1
Botha, 194	Namaqualand Meta Complex; 2-mica schist	Amph	REG	PEL														1
Botha, 196	Namaqualand Meta Complex; metapelite	Amph	REG	PEL					1									1				1				1
Botha, 196	Namaqualand Meta Complex; metapelite	Amph	REG	PEL					1									1								1																							1
Botha, 197	Namaqualand Meta Complex; metapelite, low gr	Gree	REG	PEL														1				1
Botha, 197, Fig.5	Namaqualand Meta Complex; biotite schist	Amph	REG	PEL														1																															1
C&C, 019, Table 1	Early Alpine UHP metamorphism	UHP	HPM	PEL																					1		1																					1
C&C, 020, Table 2	UHP dolomite-rich marbles, Dora-Maira Massif	UHP	HPM	CAR											1							1					1					1
C&C, 027, Table 3	Early Alpine Peak UHP metamorphism	UHP	HPM	PEL					1																1																							1
C&C, 082	Kazakhstan, Garnet-Pyroxene rocks	UHP	HPM	PEL					1																1					1
C&C, 083	Kazakhstan, Microdiamonds	UHP	HPM	PEL																										1																		1
C&C, 083	Kazakhstan, Dolomitic marbles	UHP	HPM	CAR																1					1					1	1	1									1								1
C&C, 087	Eclogite schist, Kulet	Eclo	HPM	PEL
C&C, 087	Eclogite schist, Kulet	UHP	HPM	PEL																					1
C&C, 087	Eclogite schist, Kulet	Eclo	HPM	PEL																														1
C&C, 087	Eclogite schist, Kulet	Eclo	HPM	PEL																																									1
C&C, 089	Eclogite schist, Enbek-Berlyk	Eclo	HPM	PEL
C&C, 121	UHP, Dabie Shan-Sulu orogen	UHP	HPM	UMA																										1							1
C&C, 152, Fig.5A	Eclogite, Munchberg, Bohemia	Eclo	HPM	UMA
C&C, 152, Fig.5B	Eclogite, Oberkotzau, Boheia	Eclo	HPM	UMA																																													1
C&C, 157	UHP peridotite, various, upper eclogite facies	Eclo	HPM	UMA
C&C, 158	UHP peridotite, various, UHP facies	UHP	HPM	UMA
C&C, 161	Eclogite, lower P	Eclo	HPM	PEL
C&C, 161	Eclogite, lower P	Eclo	HPM	PEL					1									1
C&C, 162	UHP, quartzofeldspathic, Bohemia	UHP	HPM	PEL																					1					1
C&C, 163	UHP, quartzofeldspathic, Bohemia	UHP	HPM	PEL																					1					1																		1
C&C, 163/164	UHP, quartzofeldspathic, Bohemia	UHP	HPM	PEL																					1					1
C&C, 166	Eclogite, Silicic, Himalaya	Eclo	HPM	PEL																					1
C&C, 167, 13-A	Eclogite, Mafic, Himalaya	Eclo	HPM	MAF																					1
C&C, 169	Eclogite, Pelitic, India	Eclo	HPM	PEL																																			1
C&C, 170	Eclogite, Pelitic, India	Eclo	HPM	PEL
C&C, 170	Eclogite, Fe-pelitic, India	Eclo	HPM	PEL																			1																									1
C&C, 229	Eclogite, pelitic, various	Eclo	HPM	PEL																																									1
C&C, 229	Eclogite, ultrabasite, various	Eclo	HPM	UMA																											1					1
C&C, 246	Eclogite assemblages	Eclo	HPM	PEL
C&C, 246	Eclogite assemblages	Eclo	HPM	PEL
C&C, 246	Eclogite assemblages	Eclo	HPM	PEL																					1
C&C, 246	Eclogite assemblages	Eclo	HPM	PEL																					1
C&C, 246	Eclogite assemblages	Eclo	HPM	PEL																											1
C&C, 246	Eclogite assemblages	Eclo	HPM	PEL																					1						1
C&C, 251	Eclogite assemblages	Eclo	HPM	PEL																											1										1
C&C, 251	Eclogite assemblages	Eclo	HPM	PEL																					1						1										1
C&C, 251	Eclogite assemblages	Eclo	HPM	PEL																					1																1
C&C, 328	Eclogite assemblages, peridotite	Eclo	HPM	UMA																																1
C&C, 332	Eclogite assemblages, hydrous peridotite	Eclo	HPM	UMA																		1														1									1
C&C, 333	Eclogite assemblages, K peridotite	Eclo	HPM	UMA																											1					1									1
C&C, 336	UHP assemblages, pelitic	UHP	HPM	PEL																					1
C&C, 445	UHP Garnet lherzolite	Eclo	HPM	UMA																																	1								1
C&C, 447	UHP Garnet peridotite	Eclo	HPM	UMA																											1														1
C&C, 459	UHP lherzolite	Eclo	HPM	UMA																																	1								1
C&C, 459	UHP lherzolite	Eclo	HPM	UMA																																	1								1
C&C, 459	UHP lherzolite	Eclo	HPM	UMA																																	1								1
C&C, 459	UHP lherzolite	Eclo	HPM	UMA																																	1								1
C&C, 459	UHP lherzolite	Eclo	HPM	UMA																		1															1								1
C&C, 474	Eclogite, Dabie Shan, China	Eclo	HPM	PEL																														1											1
Carswell, 002	Plagioclase eclogite	Eclo	HPM	PEL
Carswell, 003	Eclogite facies, intermediate	Eclo	HPM	INT
Carswell, 003	Eclogite facies, western Norway	Eclo	HPM	MAF
Carswell, 024-Table	Eclogite facies, mineral assemblages, Adula II	Eclo	HPM	MAF																														1											1
Carswell, 024-Table	Eclogite facies, mineral assemblages, Taurn-crust	Eclo	HPM	MAF										1																		1							1
Carswell, 024-Table	Eclogite facies, mineral assemblage, Zermat, crust	Eclo	HPM	MAF										1						1			1																1						1
Carswell, 024-Table	Eclogite facies, Mg mineral assemblage, Monviso	Eclo	HPM	UMA																																			1
Carswell, 024-Table	Eclogite facies, Fe-Ti mineral assemblages, Voltri	Eclo	HPM	FET										1																									1								1	1
Carswell, 024-Table	Eclogite facies, mineral assemblages, Adula I	Eclo	HPM	MAF			1																											1					1						1
Carswell, 024-Table	Eclogite facies, mineral assemblages, Sesia	Eclo	HPM	MAF																																			1
Carswell, 024-Table	Eclogite facies, mineral assemblages, Voltri Crustal	Eclo	HPM	MAF										1																				1					1									1
Carswell, 024-Table	Eclogite facies, mineral assemblage, Breuil, crust	Eclo	HPM	MAF																			1																1									1
Carswell, 024-Table	Eclogite facies, mineral assemblages, Adula III	Eclo	HPM	MAF																																			1						1
Carswell, 024-Table	Eclogite facies, mineral assemblages, Motalafjella	Eclo	HPM	MAF																														1					1
Carswell, 024-Table	Eclogite facies, mineral assemblages, Corsica Crust	Eclo	HPM	MAF	1																																		1
Carswell, 024-Table	Eclogite facies, mineral assemblages, Adua II-RD	Eclo	HPM	UMA																											1			1											1
Carswell, 024-Table	Eclogite facies, FE-Ti mineral assemblage, Monviso	Eclo	HPM	FET	1																	1																	1									1
Carswell, 024-Table	Eclogite facies, mineral assemblage, Monviso, Crust	Eclo	HPM	MAF																													1						1					1				1
Carswell, 024-Table	Eclogite facies, mineral assemblages, Naustdl	Eclo	HPM	FET										1																				1					1								1	1
Carswell, 024-Table	Eclogite facies, mineral assemblages, Almklov.-Mg	Eclo	HPM	UMA										1				1		1																									1
Carswell, 024-Table	Eclogite facies, Mg mineral assemblages, Voltri	Eclo	HPM	UMA																																			1
Carswell, 024-Table	Eclogite facies, mineral assemblages, Adula IV	Eclo	HPM	MAF																																									1		1
Carswell, 024-Table	Eclogite facies, mineral assemblages, Grytting	Eclo	HPM	MAF																					1							1													1		1
Carswell, 024-Table	Eclogite facies, mineral assemblages, Donghai	Eclo	HPM	MAF																							1					1
Carswell, 024-Table	Eclogite facies, mineral assemblages, Taurn-Mg	Eclo	HPM	UMA										1								1	1
Carswell, 024-Table	Eclogite facies, Mg mineral assemblage, Zermat	Eclo	HPM	UMA																		1	1																1						1
Carswell, 024-Table	Eclogite facies, mineral assemblages, Almklov.-FeTi	Eclo	HPM	FET																																									1				1
Carswell, 024-Table	Eclogite facies, mineral assemblages, Adula IV-RD	Eclo	HPM	UMA																											1			1											1
Carswell, 024-Table	Eclogite facies, rodingite minerals, Volti	Eclo	HPM	UMA
Carswell, 044-Table	HP granodiorite, Mte. Mucrone, Italy-II	UHP	HPM	INT
Carswell, 044-Table	HP granodiorite, Mte. Mucrone, Italy-III	UHP	HPM	INT			1																																1									1
Carswell, 044-Table	HP granodiorite, Mte. Mucrone, Italy-IV	UHP	HPM	INT			1																																1						1			1
Carswell, 044-Table	HP plagiogranite, Kamuikotan, Japan	UHP	HPM	INT																																			1									1
Carswell, 044-Table	HP acid volcanics, New Caledonia	UHP	HPM	ACI			1		1																									1					1									1	1
Carswell, 044-Table	HP tonalite, Kristiansund, Norway	UHP	HPM	INT					1							1		1																1															1
Carswell, 044-Table	HP acid volcanics, Sinfos, Greece	UHP	HPM	ACI					1														1											1					1									1
Carswell, 044-Table	HP anatectic veins in eclogite, Norway	UHP	HPM	INT
Carswell, 044-Table	HP granite, Seward Peninsula, Alaska	UHP	HPM	ACI			1		1									1																															1
Carswell, 044-Table	HP granodiorite, Seward Peninsula, Alaska	UHP	HPM	INT			1		1									1																															1
Carswell, 044-Table	HP tonolite, Seward Peninsula, Alaska	Eclo	HPM	INT			1		1									1
Carswell, 044-Table	HP tonalite, Forde Sunnfjord, Norway	UHP	HPM	INT					1									1
Carswell, 044-Table	HP acid volcanics, New Caledonia	UHP	HPM	ACI			1																											1					1										1
Carswell, 044-Table	HP granodiorite, Mte. Mucrone, Italy-I	UHP	HPM	INT																																												1
Carswell, 044-Table	HP anatectic veins in eclogite, Norway	Eclo	HPM	INT
Carswell, 044-Table	HP anatectic veins in eclogite, Norway	Eclo	HPM	INT										1
Carswell, 044-Table	HP intermediate gneiss, Glenelg, Scotland	Eclo	HPM	INT														1																															1
Carswell, 044-Table	HP anatectic veins in eclogite, Norway	UHP	HPM	INT																																													1
Carswell, 044-Table	HP tonalite, Forde Sunnfjord, Norway	UHP	HPM	INT					1							1		1																															1
Carswell, 044-Table	HP acid volcanics, New Caledonia	UHP	HPM	ACI			1																											1														1
Carswell, 044-Table	HP plagiogranite, Kanto Mts, Japan-I	UHP	HPM	INT																																			1									1
Carswell, 044-Table	HP syenite, Tafjord, Norway	Eclo	HPM	INT
Carswell, 044-Table	HP trondhjemite, Black Forest	UHP	HPM	INT
Carswell, 044-Table	HP tonalite, Forde Sunnfjord, Norway	UHP	HPM	INT		1			1
Carswell, 044-Table	HP mangerite, Flatraket, Norway	Eclo	HPM	INT					1							1																																	1
Carswell, 044-Table	HP plagiogranite, Kanto Mts, Japan-II	UHP	HPM	INT	1	1	1
Carswell, 048-Table	Carbonate ecologite facies, Hohe Tauren, Austria	Eclo	HPM	CAR																1		1										1
Carswell, 048-Table	Carbonate ecologite facies, Hohe Tauren, Austria	Eclo	HPM	CAR	1															1												1									1
Carswell, 048-Table	Carbonate ecologite facies, Hohe Tauren, Austria	Eclo	HPM	CAR														1															1								1			1	1
Carswell, 048-Table	Carbonate ecologite facies, Hohe Tauren, Austria	Eclo	HPM	CAR																		1										1
Carswell, 048-Table	Carbonate ecologite facies, Hohe Tauren, Austria	Eclo	HPM	CAR										1						1		1										1
Carswell, 048-Table	Carbonate ecologite facies, Hohe Tauren, Austria	Eclo	HPM	CAR																1											1	1
Carswell, 048-Table	Carbonate ecologite facies, Hohe Tauren, Austria	Eclo	HPM	CAR																1
Carswell, 048-Table	Carbonate ecologite facies, Hohe Tauren, Austria	Eclo	HPM	CAR																1												1
Carswell, 048-Table	Carbonate ecologite facies, Hohe Tauren, Austria	Eclo	HPM	CAR																1												1		1
Carswell, 048-Table	Carbonate ecologite facies, Hohe Tauren, Austria	Eclo	HPM	CAR																1														1											1
Carswell, 049-052	Fe-Mn-Ba HP. Basic higher P	Eclo	HPM	FEB	1	1			1																									1					1				1
Carswell, 049-052	Fe-Mn-Ba HP. Basic lower P	Eclo	HPM	FEB																																							1
Carswell, 051	Fe-Mn-Ba HP, (a) oxidized	Eclo	HPM	FEB																																												1
Carswell, 051	Fe-Mn-Ba HP, (b) reduced	Eclo	HPM	FEB																																											1
Carswell, 051-052	Fe-Mn-Ba HP, (b) peraluminous	Eclo	HPM	FEB																		1
Carswell, 052	Fe-Mn-Ba HP, (c) neutral	Eclo	HPM	FEB		1
Carswell, 164	Low-T Ecologite, New Caledonia	Eclo	HPM	INT																																			1
Carswell, 164	Low-T Blueschist, New Caledonia	Blue	HPM	INT																														1
Carswell, 166, 7.2c	Low-T Eclogite, Sifnos, Greece	Eclo	HPM	MAF	1																																		1
Carswell, 178-Table	Low-T Eclogite, New Caledonia	Eclo	HPM	INT																														1
Carswell, 178-Table	Low-T Eclogite, Sifnos, Greece	Eclo	HPM	ACI	1																													1					1
Carswell, 178-Table	Low-T Eclogite, Franciscan	Eclo	HPM	MAF																														1					1
Carswell, 188	Mid-T Eclogite, Scandivanian Caledonides	Eclo	HPM	MAF																														1														1
Carswell, 228-Table	Eclogite facies, pre-Alps, Austro-Alpine Nappes	Eclo	HPM	PEL										1
Carswell, 228-Table	Eclogite facies, pre-Alps, Austro-Alpine Nappes	Eclo	HPM	PEL																																									1
Carswell, 228-Table	Eclogite facies, pre-Alps, Austro-Alpine Nappes	Eclo	HPM	PEL
Carswell, 228-Table	Eclogite facies, pre-Alps, Austro-Alpine Nappes	Eclo	HPM	PEL										1																				1											1
Carswell, 228-Table	Eclogite facies, pre-Alps, Austro-Alpine Nappes	Eclo	HPM	PEL																												1													1
Carswell, 228-Table	Eclogite facies, pre-Alps, Austro-Alpine Nappes	Eclo	HPM	PEL	1									1
Carswell, 228-Table	Eclogite facies, pre-Alps, Austro-Alpine Nappes	Eclo	HPM	PEL
Carswell, 228-Table	Eclogite facies, pre-Alps, Austro-Alpine Nappes	Eclo	HPM	PEL												1																													1
Carswell, 228-Table	Eclogite facies, pre-Alps, Austro-Alpine Nappes	Eclo	HPM	PEL																																											1
Carswell, 228-Table	Eclogite facies, pre-Alps, Austro-Alpine Nappes	Eclo	HPM	PEL																											1														1		1
Carswell, 229-Table	Eclogite facies, pre-Alps, Austro-Alpine Nappes	Eclo	HPM	PEL										1																				1													1
Carswell, 229-Table	Eclogite facies, pre-Alps, Austro-Alpine Nappes	Eclo	HPM	PEL
Carswell, 229-Table	Eclogite facies, pre-Alps, Austro-Alpine Nappes	Eclo	HPM	PEL												1																					1								1
Carswell, 233-Table	Eclogite facies in Alpine meta-ophiolites, Pelites	Eclo	HPM	PEL					1
Carswell, 233-Table	Eclogite facies in Alpine meta-ophiolites, Pelites	Eclo	HPM	PEL					1														1										1							1				1
Carswell, 233-Table	Eclogite facies in Alpine meta-ophiolites, Pelites	Eclo	HPM	PEL		1			1																									1					1
Carswell, 233-Table	Eclogite facies in Alpine meta-ophiolites, MAF	Eclo	HPM	MAF	1																																		1
Carswell, 233-Table	Eclogite facies in Alpine meta-ophiolites, Chert	Eclo	HPM	CHT																																							1
Carswell, 233-Table	Eclogite facies in Alpine meta-ophiolites, Pelites	Eclo	HPM	PEL					1											1		1	1
Carswell, 233-Table	Eclogite facies in Alpine meta-ophiolites, Chert	Eclo	HPM	CHT
Carswell, 233-Table	Eclogite facies in Alpine meta-ophiolites, Chert	Eclo	HPM	CHT
Carswell, 233-Table	Eclogite facies in Alpine meta-ophiolites, UMA	Eclo	HPM	UMA		1																1															1
Carswell, 233-Table	Eclogite facies in Alpine meta-ophiolites, UMA	Eclo	HPM	UMA		1																									1						1									1
Carswell, 233-Table	Eclogite facies in Alpine meta-ophiolites, MAF	Eclo	HPM	MAF																																			1
Carswell, 233-Table	Eclogite facies in Alpine meta-ophiolites, MAF	Eclo	HPM	MAF
Carswell, 233-Table	Eclogite facies in Alpine meta-ophiolites, MAF	Eclo	HPM	MAF																			1
Carswell, 233-Table	Eclogite facies in Alpine meta-ophiolites, MAF	Eclo	HPM	MAF																			1																1
Carswell, 233-Table	Eclogite facies in Alpine meta-ophiolites, Basalt	Eclo	HPM	MAF																													1						1					1
Carswell, 233-Table	Eclogite facies in Alpine meta-ophiolites, MAF	Eclo	HPM	MAF																																			1
Carswell, 233-Table	Eclogite facies in Alpine meta-ophiolites, Basalt	Eclo	HPM	MAF																																			1
Carswell, 233-Table	Eclogite facies in Alpine meta-ophiolites, MAF	Eclo	HPM	MAF
Carswell, 233-Table	Eclogite facies in Alpine meta-ophiolites, Basalt	Eclo	HPM	MAF
Carswell, 233-Table	Eclogite facies in Alpine meta-ophiolites, MAF	Eclo	HPM	MAF																			1
Carswell, 233-Table	Eclogite facies in Alpine meta-ophiolites, MAF	Eclo	HPM	MAF										1									1																1
Carswell, 233-Table	Eclogite facies in Alpine meta-ophiolites, MAF	Eclo	HPM	MAF
Carswell, 233-Table	Eclogite facies in Alpine meta-ophiolites, MAF	Eclo	HPM	MAF
Carswell, 233-Table	Eclogite facies in Alpine meta-ophiolites, Trond	Eclo	HPM	INT																																			1									1
Carswell, 233-Table	Eclogite facies in Alpine meta-ophiolites, Trond	Eclo	HPM	INT																																												1
Carswell, 233-Table	Eclogite facies in Alpine meta-ophiolites, IPSed	Eclo	HPM	PEL					1																							1		1					1
Carswell, 233-Table	Eclogite facies in Alpine meta-ophiolites, Chert	Eclo	HPM	CHT		1			1
Carswell, 239-Table	Eclogite facies in Adula Nappe ophiolites, Bas	Eclo	HPM	MAF			1																																						1
Carswell, 239-Table	Eclogite facies in Adula Nappe ophiolites, Bas	Eclo	HPM	MAF																																									1
Carswell, 239-Table	Eclogite facies in Adula Nappe ophiolites, Calc	Eclo	HPM	CAR																1												1									1				1
Carswell, 239-Table	Eclogite facies in Adula Nappe ophiolites, Pel	Eclo	HPM	PEL																												1		1							1
Carswell, 239-Table	Eclogite facies in Adula Nappe ophiolites, Bas	Eclo	HPM	MAF																																									1
Carswell, 239-Table	Eclogite facies in Adula Nappe ophiolites, Bas	Eclo	HPM	MAF
Carswell, 239-Table	Eclogite facies in Adula Nappe ophiolites, Pel	Eclo	HPM	PEL																																					1
Carswell, 239-Table	Eclogite facies in Adula Nappe ophiolites, Qtz	Eclo	HPM	UMA					1
Carswell, 239-Table	Eclogite facies in Adula Nappe ophiolites, Bas	Eclo	HPM	MAF																1														1					1
Carswell, 239-Table	Eclogite facies in Adula Nappe ophiolites, UMA	Eclo	HPM	UMA																											1						1								1
Carswell, 239-Table	Eclogite facies in Adula Nappe ophiolites, UMA	Eclo	HPM	UMA																											1						1
Carswell, 239-Table	Eclogite facies in Adula Nappe ophiolites, Bas	Eclo	HPM	MAF																														1											1
Carswell, 239-Table	Eclogite facies in Adula Nappe ophiolites, Bas	Eclo	HPM	MAF																																									1		1
Carswell, 239-Table	Eclogite facies in Adula Nappe ophiolites, Bas	Eclo	HPM	MAF																																									1		1
Carswell, 239-Table	Eclogite facies in Adula Nappe ophiolites, Bas	Eclo	HPM	MAF																																									1
Carswell, 239-Table	Eclogite facies in Adula Nappe ophiolites, Calc	Eclo	HPM	CAR	1															1											1	1
Carswell, 239-Table	Eclogite facies in Adula Nappe ophiolites, Calc	Eclo	HPM	CAR																												1									1
Carswell, 239-Table	Eclogite facies in Adula Nappe ophiolites, Bas	Eclo	HPM	MAF																																			1
Carswell, 239-Table	Eclogite facies in Adula Nappe ophiolites, Bas	Eclo	HPM	MAF
Carswell, 239-Table	Eclogite facies in Adula Nappe ophiolites, Rod	Eclo	HPM	UMA																											1			1							1				1
Carswell, 24-Table	Eclogite facies, mineral assemblages, CA Crustal	Eclo	HPM	MAF	1										1																			1					1
Carswell, 241-Table	Eclogite facies in Tauren, East Alps, Metabasalt	Eclo	HPM	MAF										1																				1
Carswell, 241-Table	Eclogite facies in Tauren, East Alps, Calc	Eclo	HPM	CAR																												1
Carswell, 241-Table	Eclogite facies in Tauren, East Alps, Calc	Eclo	HPM	CAR																												1									1
Carswell, 241-Table	Eclogite facies in Tauren, East Alps, Metabasalt	Eclo	HPM	MAF										1
Carswell, 241-Table	Eclogite facies in Tauren, East Alps, Metabasite	Eclo	HPM	MAF										1																		1
Carswell, 241-Table	Eclogite facies in Tauren, East Alps, Pelite	Eclo	HPM	PEL					1														1									1		1
Carswell, 241-Table	Eclogite facies in Tauren, East Alps, Dolomite	Eclo	HPM	CAR																1											1	1
Carswell, 241-Table	Eclogite facies in Tauren, East Alps, Metabasalt	Eclo	HPM	MAF										1																									1
Carswell, 241-Table	Eclogite facies in Tauren, East Alps, Metabasite	Eclo	HPM	MAF																														1
Carswell, 241-Table	Eclogite facies in Tauren, East Alps, Metabasalt	Eclo	HPM	MAF																												1
Carswell, 241-Table	Eclogite facies in Tauren, East Alps, Metabasalt	Eclo	HPM	MAF										1
Carswell, 241-Table	Eclogite facies in Tauren, East Alps, Metabasalt	Eclo	HPM	MAF										1																		1		1					1
Carswell, 241-Table	Eclogite facies in Tauren, East Alps, Metabasite	Eclo	HPM	MAF																												1
Carswell, 241-Table	Eclogite facies in Tauren, East Alps, Metabasite	Eclo	HPM	MAF																												1
Carswell, 241-Table	Eclogite facies in Tauren, East Alps, Calc	Eclo	HPM	CAR																												1
Carswell, 241-Table	Eclogite facies in Tauren, East Alps, Metabasalt	Eclo	HPM	MAF										1																		1							1
Carswell, 241-Table	Eclogite facies in Tauren, East Alps, Metabasalt	Eclo	HPM	MAF										1								1	1
Carswell, 241-Table	Eclogite facies in Tauren, East Alps, Metabasite	Eclo	HPM	MAF																		1	1
Carswell, 241-Table	Eclogite facies in Tauren, East Alps, Metabasalt	Eclo	HPM	MAF																																			1
Carswell, 241-Table	Eclogite facies in Tauren, East Alps, Metabasite	Eclo	HPM	MAF
Carswell, 241-Table	Eclogite facies in Tauren, East Alps, Metabasite	Eclo	HPM	MAF										1
Carswell, 246-Table	Eclogite facies in Sesia Zone, Intermediate	Eclo	HPM	INT
Carswell, 246-Table	Eclogite facies in Sesia Zone, Metabasites	Eclo	HPM	MAF																													1	1					1
Carswell, 246-Table	Eclogite facies in Sesia Zone, Metabasites	Eclo	HPM	MAF																													1						1
Carswell, 246-Table	Eclogite facies in Sesia Zone, Pelitic	Eclo	HPM	PEL					1														1
Carswell, 246-Table	Eclogite facies in Sesia Zone, Granite	Eclo	HPM	ACI																																												1	1
Carswell, 246-Table	Eclogite facies in Sesia Zone, Intermediate	Eclo	HPM	INT
Carswell, 246-Table	Eclogite facies in Sesia Zone, Marbles	Eclo	HPM	CAR																1												1							1		1
Carswell, 246-Table	Eclogite facies in Sesia Zone, Intermediate	Eclo	HPM	INT																																			1
Carswell, 246-Table	Eclogite facies in Sesia Zone, Granite	Eclo	HPM	ACI																																												1	1
Carswell, 246-Table	Eclogite facies in Sesia Zone, Pelitic	Eclo	HPM	PEL					1														1																	1
Carswell, 246-Table	Eclogite facies in Sesia Zone, Pelitic	Eclo	HPM	PEL					1														1
Carswell, 246-Table	Eclogite facies in Sesia Zone, Pelitic	Eclo	HPM	PEL					1
Carswell, 246-Table	Eclogite facies in Sesia Zone, Metabasites	Eclo	HPM	MAF																																			1
Carswell, 246-Table	Eclogite facies in Sesia Zone, Granite	Eclo	HPM	ACI					1																														1									1
Carswell, 246-Table	Eclogite facies in Sesia Zone, Marbles	Eclo	HPM	CAR																1												1								1
Carswell, 246-Table	Eclogite facies in Sesia Zone, Metabasites	Eclo	HPM	MAF
Carswell, 246-Table	Eclogite facies in Sesia Zone, Pelitic	Eclo	HPM	PEL					1														1
Carswell, 248-Table	Eclogite facies in Alps, Orthogneiss	Eclo	HPM	INT			1		1																																								1
Carswell, 248-Table	Eclogite facies in Alps, Mica Schists	Eclo	HPM	PEL																		1	1
Carswell, 248-Table	Eclogite facies in Alps, Mica Schists	Eclo	HPM	PEL					1													1	1
Carswell, 248-Table	Eclogite facies in Alps, Mica Schists	Eclo	HPM	PEL																			1
Carswell, 248-Table	Eclogite facies in Alps, Paragneiss	Eclo	HPM	PEL					1														1																1
Carswell, 248-Table	Eclogite facies in Alps, Orthogneiss	Eclo	HPM	INT		1																																										1	1
Carswell, 248-Table	Eclogite facies in Alps, Mica Schists	Eclo	HPM	PEL																		1	1
Carswell, 248-Table	Eclogite facies in Alps, Paragneiss	Eclo	HPM	PEL					1														1
Carswell, 248-Table	Eclogite facies in Alps, Metabasites	Eclo	HPM	MAF
Carswell, 248-Table	Eclogite facies in Alps, Metabasites	Eclo	HPM	MAF																																			1
Carswell, 248-Table	Eclogite facies in Alps, Metabasites	Eclo	HPM	MAF																		1												1
Carswell, 250-Table	Eclogite facies, Dora Maira massif, metabasite	Eclo	HPM	MAF																																												1
Carswell, 250-Table	Eclogite facies, Dora Maira massif, marble	Eclo	HPM	CAR																1												1									1
Carswell, 250-Table	Eclogite facies, Dora Maira massif, metabasite	Eclo	HPM	MAF
Carswell, 250-Table	Eclogite facies, Dora Maira massif, orthogneiss	Eclo	HPM	INT																																												1
Carswell, 250-Table	Eclogite facies, Dora Maira massif, paragneiss	Eclo	HPM	PEL					1																																							1
Carswell, 250-Table	Eclogite facies, Dora Maira massif, mica schist	Eclo	HPM	PEL																					1																							1
Carswell, 250-Table	Eclogite facies, Dora Maira massif, paragneiss	Eclo	HPM	PEL					1																																							1
Carswell, 319	UHP Eclogites, Roberts Victor	UHP	HPM	UMA																					1
Carswell, 319	UHP Eclogites, Roberts Victor	UHP	HPM	UMA																					1
Carswell, 319	UHP Eclogites, Roberts Victor	UHP	HPM	UMA
Coleman-Table1	Kyanite Eclogite	Eclo	HPM	MAF					1
Coleman-Table1	Orthopyroxene Eclogite	Eclo	HPM	MAF					1																					1						1
Coleman-Table1	Eclogite	Eclo	HPM	MAF					1
Coleman-Table1	Amphibole Eclogite	Eclo	HPM	MAF					1
Coleman-Table1	Plagioclase Eclogite	Eclo	HPM	MAF					1																																				1
Coleman-Table2	Eclogite, New Caledonia	Eclo	HPM	MAF					1													1												1					1
Coleman-Table2	Eclogite, Tiburon	Eclo	HPM	MAF					1													1												1
Coleman-Table2	Eclogite, Junction School	Eclo	HPM	MAF					1													1																	1
Coleman-Table2	Eclogite, Occidental	Eclo	HPM	MAF					1													1												1
Coleman-Table2	Eclogite, Valley Ford	Eclo	HPM	MAF					1
Coleman-Table2	Eclogite, Loch Duich	Eclo	HPM	MAF					1																									1
Coleman-Table2	Eclogite, West Creek	Eclo	HPM	MAF					1													1												1					1
Coleman-Table2	Eclogite, KaO Pipe	Eclo	HPM	MAF					1
Ferry-1984-22A	Biotite Isograd, South-central Maine	Gree	REG	PEL																	1	1											1							1
Ferry-1984-22B	Biotite Isograd, South-central Maine	Gree	REG	PEL																		1																									1
Ferry-1984-33A	Biotite Isograd, South-central Maine	Gree	REG	PEL														1		1	1	1																									1
Ferry-1984-33B	Biotite Isograd, South-central Maine	Gree	REG	PEL														1		1		1																									1
Ferry-1984-410A	Biotite Isograd, South-central Maine	Gree	REG	PEL																	1	1																		1
Ferry-1984-411A	Biotite Isograd, South-central Maine	Gree	REG	PEL										1							1	1											1							1
Ferry-1984-413A	Biotite Isograd, South-central Maine	Gree	REG	PEL										1						1	1	1											1							1
Ferry-1984-416A	Biotite Isograd, South-central Maine	Gree	REG	PEL										1						1	1	1											1							1
Ferry-1984-417A	Biotite Isograd, South-central Maine	Gree	REG	PEL																	1	1											1							1
Ferry-1984-418A	Biotite Isograd, South-central Maine	Gree	REG	PEL														1			1	1																									1
Ferry-1984-418B	Biotite Isograd, South-central Maine	Gree	REG	PEL														1			1	1																									1
Ferry-1984-420A	Biotite Isograd, South-central Maine	Gree	REG	PEL														1			1	1																									1
Ferry-1984-423A	Biotite Isograd, South-central Maine	Gree	REG	PEL														1		1	1	1																									1
Ferry-1984-429A	Biotite Isograd, South-central Maine	Gree	REG	PEL														1		1	1	1																									1
Ferry-1984-431A	Biotite Isograd, South-central Maine	Gree	REG	PEL										1							1	1																		1
Ferry-1984-7A	Biotite Isograd, South-central Maine	Gree	REG	PEL										1							1	1											1							1
Ferry-1987-116	Tertiary Basalt, Isle of Skye, Scotland	AbHf	CON	MAF												1					1	1															1										1
Ferry-1987-119	Tertiary Basalt, Isle of Skye, Scotland	AbHf	CON	MAF												1						1															1										1
Ferry-1987-133	Tertiary Basalt, Isle of Skye, Scotland	AbHf	CON	MAF												1						1															1										1
Ferry-1987-174	Tertiary Basalt, Isle of Skye, Scotland	AbHf	CON	MAF												1						1															1										1
Ferry-1987-181	Tertiary Basalt, Isle of Skye, Scotland	AbHf	CON	MAF												1				1	1	1																									1
Ferry-1987-182	Tertiary Basalt, Isle of Skye, Scotland	AbHf	CON	MAF												1				1		1															1										1
Ferry-1987-183	Tertiary Basalt, Isle of Skye, Scotland	AbHf	CON	MAF												1					1	1															1										1
Ferry-1987-184	Tertiary Basalt, Isle of Skye, Scotland	AbHf	CON	MAF												1				1		1
Ferry-1987-41	Tertiary Basalt, Isle of Skye, Scotland	PyxHn	CON	MAF												1		1			1																1										1
Ferry-1987-43	Tertiary Basalt, Isle of Skye, Scotland	PyxHn	CON	MAF												1		1			1																1										1
Ferry-1987-45	Tertiary Basalt, Isle of Skye, Scotland	PyxHn	CON	MAF												1		1			1																1										1
Ferry-1987-47	Tertiary Basalt, Isle of Skye, Scotland	PyxHn	CON	MAF												1		1																			1										1
Ferry-1987-51	Tertiary Basalt, Isle of Skye, Scotland	HnHf	CON	MAF	1						1					1						1												1											1		1
Ferry-1987-93	Tertiary Basalt, Isle of Skye, Scotland	HnHf	CON	MAF	1											1						1												1											1		1
Ferry-1987-96	Tertiary Basalt, Isle of Skye, Scotland	HnHf	CON	MAF	1											1						1												1											1		1
Ferry-1987-97	Tertiary Basalt, Isle of Skye, Scotland	HnHf	CON	MAF	1						1					1					1	1																							1		1
Ferry-1988-C2E	Northern New England	Gree	REG	PEL														1		1		1																									1
Ferry-1988-C4E	Northern New England	Gree	REG	PEL														1			1	1												1													1
Ferry-1988-C4I	Northern New England	Gree	REG	MAF	1													1		1	1	1												1													1
Ferry-1988-C4J	Northern New England	Gree	REG	SST														1			1	1																									1
Ferry-1988-F1B	Northern New England	Gree	REG	MAF																		1											1
Ferry-1988-H1C	Northern New England	Gree	REG	MAF	1													1		1	1	1												1
Ferry-1988-H4F	Northern New England	Gree	REG	MAF	1															1		1												1													1
Ferry-1988-L1B	Northern New England	Gree	REG	PEL																	1	1
Ferry-1988-LW1C	Northern New England	Gree	REG	MAF																1	1	1
Ferry-1988-LW2A	Northern New England	Gree	REG	PEL																	1	1											1
Ferry-1988-LW2H	Northern New England	Gree	REG	SST																	1	1											1
Ferry-1988-LW2P	Northern New England	Gree	REG	MAF																		1											1
Ferry-1988-NHd1E	Northern New England	Gree	REG	CAR																1	1												1														1
Ferry-1988-NHd1I	Northern New England	Gree	REG	SST																	1	1											1														1
Ferry-1988-NHd1O	Northern New England	Gree	REG	PEL																	1	1											1
Ferry-1988-NHd3B	Northern New England	Gree	REG	MAF																1	1	1												1
Ferry-1988-Q1B	Northern New England	Gree	REG	PEL														1			1	1											1														1
Ferry-1988-Q1C	Northern New England	Gree	REG	SST														1		1	1												1														1
Ferry-1988-Q1J	Northern New England	Gree	REG	CAR																1													1
Ferry-1989-1A	Hope Valley, Alpine County, California	HbHn	CON	CSI																1											1																		1
Ferry-1989-1J	Hope Valley, Alpine County, California	HbHn	CON	CSI																1	1										1										1								1
Ferry-1989-5A	Hope Valley, Alpine County, California	HbHn	CON	CAR																1	1																								1				1
Ferry-1989-5B	Hope Valley, Alpine County, California	HbHn	CON	CSI																1	1										1														1				1
Ferry-1989-5E	Hope Valley, Alpine County, California	HbHn	CON	CAR														1		1	1																								1				1
Ferry-1989-5G	Hope Valley, Alpine County, California	HbHn	CON	CAR														1		1											1														1				1
Ferry-1989-5H	Hope Valley, Alpine County, California	HbHn	CON	CSI																1	1										1														1				1
Ferry-1989-5J	Hope Valley, Alpine County, California	HbHn	CON	CSI																1	1										1														1				1
Ferry-1989-5L	Hope Valley, Alpine County, California	HbHn	CON	CSI																1	1										1														1				1
Ferry-1989-6A	Hope Valley, Alpine County, California	HbHn	CON	CAR																1																													1
Ferry-1989-6E	Hope Valley, Alpine County, California	HbHn	CON	CSI																1	1										1														1				1
Ferry-1989-6I	Hope Valley, Alpine County, California	HbHn	CON	CSI																1	1										1														1				1
Ferry-1989-7A	Hope Valley, Alpine County, California	HbHn	CON	CSI																1											1										1								1
Ferry-1989-7D	Hope Valley, Alpine County, California	HbHn	CON	CSI																1											1										1								1
Ferry-1992-12-1A	Waits River Fm, Vermont	Gree	REG	CSI																1													1							1
Ferry-1992-16-16A	Waits River Fm, Vermont	Gree	REG	CSI														1		1		1											1							1
Ferry-1992-16-8B	Waits River Fm, Vermont	Gree	REG	CSI																1													1							1
Ferry-1992-21-6A	Waits River Fm, Vermont	Gree	REG	CSI														1		1		1											1							1
Ferry-1992-22-2A	Waits River Fm, Vermont	Amph	REG	CSI														1		1	1	1											1							1					1
Ferry-1992-26-3B	Waits River Fm, Vermont	Gree	REG	CSI																1													1							1
Ferry-1992-27-3A	Waits River Fm, Vermont	Gree	REG	CSI														1		1	1	1																		1
Ferry-1992-28-1B	Waits River Fm, Vermont	Amph	REG	CSI														1		1		1											1							1					1
Ferry-1992-28-7A	Waits River Fm, Vermont	Amph	REG	CSI														1		1		1											1							1					1
Ferry-1992-3-12A	Waits River Fm, Vermont	Amph	REG	CSI														1		1		1																		1					1
Ferry-1992-3-4G	Waits River Fm, Vermont	Amph	REG	CSI														1		1											1									1					1				1
Ferry-1992-3-6A	Waits River Fm, Vermont	Gree	REG	CSI																1	1	1											1							1
Ferry-1992-3-8A	Waits River Fm, Vermont	Gree	REG	CSI														1		1		1											1							1
Ferry-1992-33-1H	Waits River Fm, Vermont	Gree	REG	CSI																1	1												1							1
Ferry-1992-33-5A	Waits River Fm, Vermont	Gree	REG	CSI																1	1												1							1
Ferry-1992-34-1A	Waits River Fm, Vermont	Amph	REG	CSI																1											1									1					1				1
Ferry-1992-34-3A	Waits River Fm, Vermont	Gree	REG	CSI																1	1	1											1							1
Ferry-1992-34-8A	Waits River Fm, Vermont	Amph	REG	CSI																1	1										1									1					1				1
Ferry-1992-34-9A	Waits River Fm, Vermont	Amph	REG	CSI																1											1									1					1				1
Ferry-1992-35-2A	Waits River Fm, Vermont	Gree	REG	CSI														1		1	1												1							1
Ferry-1992-39-1A	Waits River Fm, Vermont	Gree	REG	CSI																1	1												1							1
Ferry-1992-39-3A	Waits River Fm, Vermont	Gree	REG	CSI																1													1							1
Ferry-1992-4-4A	Waits River Fm, Vermont	Amph	REG	CSI														1		1											1									1					1				1
Ferry-1992-40-11B	Waits River Fm, Vermont	Amph	REG	CSI														1		1	1	1																		1					1
Ferry-1992-40-2A	Waits River Fm, Vermont	Gree	REG	CSI														1		1	1	1											1							1
Ferry-1992-8-6A	Waits River Fm, Vermont	Gree	REG	CSI																1													1							1
Ferry-1993-Davis-1A	Twin Lakes area, central Sierra Nevada, California	Amph	CON	CSI																1												1				1
Ferry-1993-Davis-1B	Twin Lakes area, central Sierra Nevada, California	Amph	CON	CSI																1											1	1				1
Ferry-1993-Davis-1D	Twin Lakes area, central Sierra Nevada, California	Amph	CON	CSI																1											1	1				1
Ferry-1993-Davis-1E	Twin Lakes area, central Sierra Nevada, California	Amph	CON	CSI																1											1
Ferry-1993-Davis-1L	Twin Lakes area, central Sierra Nevada, California	Amph	CON	CSI																1		1										1				1
Ferry-1993-Davis-2C	Twin Lakes area, central Sierra Nevada, California	Amph	CON	CSI																1											1	1				1
Ferry-1993-Davis-2D	Twin Lakes area, central Sierra Nevada, California	Amph	CON	CSI																1											1
Ferry-1993-Davis-2E	Twin Lakes area, central Sierra Nevada, California	Amph	CON	CSI																1											1
Ferry-1993-Davis-2G	Twin Lakes area, central Sierra Nevada, California	Amph	CON	CSI																1											1	1				1
Ferry-1993-Davis-2H	Twin Lakes area, central Sierra Nevada, California	Amph	CON	CSI																1											1
Ferry-1993-Davis-3B	Twin Lakes area, central Sierra Nevada, California	Amph	CON	CSI																1												1				1
Ferry-1993-Davis-3C	Twin Lakes area, central Sierra Nevada, California	Amph	CON	CSI																1		1										1				1
Ferry-1993-Davis-3G	Twin Lakes area, central Sierra Nevada, California	Amph	CON	CSI							1	1								1											1																		1
Ferry-1993-Davis-3J	Twin Lakes area, central Sierra Nevada, California	Amph	CON	CSI							1	1								1											1																		1
Ferry-1993-Davis-3L	Twin Lakes area, central Sierra Nevada, California	Amph	CON	CSI							1	1								1											1																		1
Ferry-1993-Davis-3N	Twin Lakes area, central Sierra Nevada, California	Amph	CON	CSI																1												1				1
Ferry-1993-Davis-3O	Twin Lakes area, central Sierra Nevada, California	Amph	CON	CSI								1								1											1
Ferry-1993-Davis-4C	Twin Lakes area, central Sierra Nevada, California	Amph	CON	CSI																1											1	1
Ferry-1993-Davis-4D	Twin Lakes area, central Sierra Nevada, California	Amph	CON	CSI																1											1	1				1
Ferry-1994-18TL	Garnet Zone, Waterville Fm, Maine	Gree	REG	CAR							1							1		1	1	1																									1
Ferry-1994-21-23	Kyanite Zone, East-Central Vermont	Gree	REG	PEL					1									1			1	1																									1
Ferry-1994-21-23D	Kyanite Zone, East-Central Vermont	Gree	REG	CAR														1		1		1											1												1
Ferry-1994-21-24B	Kyanite Zone, East-Central Vermont	Amph	REG	SST					1									1			1	1											1														1
Ferry-1994-21-24C	Kyanite Zone, East-Central Vermont	Amph	REG	CAR							1							1		1	1	1																									1
Ferry-1994-21-24H	Kyanite Zone, East-Central Vermont	Amph	REG	PEL					1									1		1	1																										1
Ferry-1994-21-26A	Garnet Zone, East-Central Vermont	Gree	REG	PEL					1									1			1	1																									1
Ferry-1994-21-26D	Garnet Zone, East-Central Vermont	Gree	REG	CAR					1									1		1	1
Ferry-1994-21-26H	Garnet Zone, East-Central Vermont	Gree	REG	SST					1									1		1	1																										1
Ferry-1994-21-29C	Kyanite Zone, East-Central Vermont	Amph	REG	SST							1							1		1	1	1											1														1
Ferry-1994-21-29G	Kyanite Zone, East-Central Vermont	Amph	REG	PEL					1									1			1																										1
Ferry-1994-21-29H	Kyanite Zone, East-Central Vermont	Amph	REG	CAR														1		1	1	1											1														1
Ferry-1994-21-2C	Kyanite Zone, East-Central Vermont	Gree	REG	PEL					1									1		1	1												1														1
Ferry-1994-21-2F	Kyanite Zone, East-Central Vermont	Gree	REG	CAR														1		1	1												1
Ferry-1994-21-35B	Garnet Zone, East-Central Vermont	Gree	REG	PEL					1									1			1	1											1														1
Ferry-1994-21-35C	Garnet Zone, East-Central Vermont	Gree	REG	CAR																1	1												1
Ferry-1994-215TL	Staurolite Zone, Waterville Fm, Maine	Amph	REG	CAR							1									1	1																								1
Ferry-1994-26-10A	Chlorite Zone, East-Central Vermont	Gree	REG	PEL																	1	1											1														1
Ferry-1994-26-10D	Chlorite Zone, East-Central Vermont	Gree	REG	CAR																1	1												1
Ferry-1994-26-11B	Garnet Zone, East-Central Vermont	Gree	REG	CAR																1													1
Ferry-1994-26-11C	Garnet Zone, East-Central Vermont	Gree	REG	PEL					1									1		1	1	1											1														1
Ferry-1994-32TL	Biotite Zone, Waterville Fm, Maine	Gree	REG	CAR														1		1	1	1											1														1
Ferry-1994-33-7A	Chlorite Zone, East-Central Vermont	Gree	REG	CAR																1													1
Ferry-1994-33-7C	Chlorite Zone, East-Central Vermont	Gree	REG	PEL																1	1	1											1
Ferry-1994-411TL	Chlorite Zone, Waterville Fm, Maine	Gree	REG	CAR																	1	1											1
Ferry-1994-429TL	Biotite Zone, Waterville Fm, Maine	Gree	REG	CAR																1	1												1
Ferry-1994-44TL	Staurolite Zone, Waterville Fm, Maine	Amph	REG	CAR																1	1	1																							1		1
Ferry-1994-7TL	Chlorite Zone, Waterville Fm, Maine	Gree	REG	CAR																1	1												1
Ferry-1994-A1	Garnet Zone, Waterville Fm, Maine	Gree	REG	CAR														1		1	1												1
Ferry-1994-A2	Garnet Zone, Waterville Fm, Maine	Gree	REG	CAR														1		1	1												1
Ferry-1994-A3	Garnet Zone, Waterville Fm, Maine	Gree	REG	CAR																1	1												1
Ferry-1994-B1	Garnet Zone, Waterville Fm, Maine	Gree	REG	CAR														1		1	1	1											1
Ferry-1994-B2	Garnet Zone, Waterville Fm, Maine	Gree	REG	CAR														1		1	1	1											1
Ferry-1994-B3	Garnet Zone, Waterville Fm, Maine	Gree	REG	CAR														1		1	1	1											1
Ferry-1994-Q2C	Garnet Zone, East-Central Vermont	Gree	REG	PEL					1									1			1	1																									1
Ferry-1994-Q2F	Garnet Zone, East-Central Vermont	Gree	REG	CAR							1							1		1	1												1														1
Ferry-1994-Q2I	Garnet Zone, East-Central Vermont	Gree	REG	SST					1									1			1												1														1
Ferry-1995-10A	Bergell Aureole, Val Malenco, Italy	Gree	CON	CAR										1						1											1					1
Ferry-1995-11A	Bergell Aureole, Val Malenco, Italy	Gree	CON	CAR										1						1											1
Ferry-1995-11C	Bergell Aureole, Val Malenco, Italy	Gree	CON	CAR										1						1											1					1
Ferry-1995-13C	Bergell Aureole, Val Malenco, Italy	Gree	CON	CAR										1						1											1
Ferry-1995-1C	Bergell Aureole, Val Malenco, Italy	Gree	CON	CAR										1						1											1
Ferry-1995-2C	Bergell Aureole, Val Malenco, Italy	Gree	CON	CAR										1						1											1
Ferry-1995-4A	Bergell Aureole, Val Malenco, Italy	Gree	CON	CAR										1						1											1	1
Ferry-1995-7A	Bergell Aureole, Val Malenco, Italy	Gree	CON	CAR										1						1											1
Ferry-1995-8A	Bergell Aureole, Val Malenco, Italy	Gree	CON	CAR										1						1											1					1
Ferry-1995-9C	Bergell Aureole, Val Malenco, Italy	Gree	CON	CAR										1						1												1				1
Ferry-1996a-1A	Ballachulish Aureole, Scotland	HnHf	CON	CSI													1		1	1												1				1		1
Ferry-1996a-2A	Ballachulish Aureole, Scotland	HnHf	CON	CSI													1		1	1		1										1				1		1
Ferry-1996a-3A	Ballachulish Aureole, Scotland	HnHf	CON	CSI													1		1	1												1				1
Ferry-1996a-3B	Ballachulish Aureole, Scotland	HnHf	CON	CSI													1		1	1												1				1
Ferry-1996a-7A	Ballachulish Aureole, Scotland	HnHf	CON	CSI										1						1		1									1	1				1
Ferry-1996a-7C	Ballachulish Aureole, Scotland	HnHf	CON	CSI										1						1		1									1	1				1		1
Ferry-1996a-8A	Ballachulish Aureole, Scotland	HnHf	CON	CSI										1			1		1	1		1										1				1		1
Ferry-1996b-4A	Ballachulish Aureole, Scotland	HnHf	CON	CSI										1						1		1									1														1				1
Ferry-1996b-4C	Ballachulish Aureole, Scotland	HnHf	CON	CSI										1						1											1																		1
Ferry-1996b-4E	Ballachulish Aureole, Scotland	HnHf	CON	CSI																1											1																		1
Ferry-1996b-4J	Ballachulish Aureole, Scotland	HnHf	CON	CSI										1						1		1									1														1				1
Ferry-1996b-5A	Ballachulish Aureole, Scotland	HnHf	CON	CSI										1					1	1											1	1				1									1
Ferry-1996b-6A	Ballachulish Aureole, Scotland	HnHf	CON	CSI										1						1		1									1	1				1									1
Ferry-1997-B2B	Aureole, Beinn an Dubhaich, Scotland	HbHn	CON	CAR																1		1										1				1
Ferry-1997-B3G	Aureole, Beinn an Dubhaich, Scotland	HbHn	CON	CAR															1	1												1				1										1
Ferry-1997-B3J	Aureole, Beinn an Dubhaich, Scotland	HbHn	CON	CAR															1	1												1				1										1
Ferry-1997-B3Q	Aureole, Beinn an Dubhaich, Scotland	HbHn	CON	CAR																1		1										1				1
Ferry-1997-B4Q	Aureole, Beinn an Dubhaich, Scotland	HbHn	CON	CAR															1	1												1				1
Ferry-1997-B4T	Aureole, Beinn an Dubhaich, Scotland	HbHn	CON	CAR																1		1										1				1
Ferry-1997-B4Z	Aureole, Beinn an Dubhaich, Scotland	HbHn	CON	CAR										1					1	1		1										1														1
Ferry-1997-S1R	Aureole, Silver Star, Montana	HbHn	CON	CAR															1	1												1														1
Ferry-1997-S1W	Aureole, Silver Star, Montana	HbHn	CON	CAR																1												1				1										1
Ferry-1997-S2B	Aureole, Silver Star, Montana	HbHn	CON	CAR										1						1												1				1
Ferry-1997-S2D	Aureole, Silver Star, Montana	HbHn	CON	CAR										1					1	1												1				1										1
Ferry-1997-S5L	Aureole, Silver Star, Montana	HbHn	CON	CAR										1					1	1												1				1										1
Ferry-1997-S5N	Aureole, Silver Star, Montana	HbHn	CON	CAR																1		1										1				1
Ferry-1998-1D	Ritter Range pendant, California	HbHn	CON	CSI										1				1		1		1									1	1				1									1
Ferry-1998-1H	Ritter Range pendant, California	HbHn	CON	CSI	1									1						1											1																		1
Ferry-1998-2D	Ritter Range pendant, California	HbHn	CON	CSI										1						1											1										1								1
Ferry-1998-2H	Ritter Range pendant, California	HbHn	CON	CSI										1						1											1										1								1
Ferry-1998-2K	Ritter Range pendant, California	HbHn	CON	CSI										1				1		1											1	1				1									1
Ferry-1998-2N	Ritter Range pendant, California	HbHn	CON	CSI	1															1											1																		1
Ferry-1998-2O	Ritter Range pendant, California	HbHn	CON	CSI										1						1											1										1								1
Ferry-1998-3B	Ritter Range pendant, California	HbHn	CON	CSI										1						1											1										1								1
Ferry-1998-3L	Ritter Range pendant, California	HbHn	CON	CSI	1									1				1		1											1																		1
Ferry-1998-3O	Ritter Range pendant, California	HbHn	CON	CSI										1						1											1										1								1
Ferry-1998-4A	Ritter Range pendant, California	HbHn	CON	CSI										1				1		1		1									1					1									1
Ferry-1998-4D	Ritter Range pendant, California	HbHn	CON	CSI										1						1											1										1								1
Ferry-1998-4G	Ritter Range pendant, California	HbHn	CON	CSI										1						1											1																		1
Ferry-2001-1A	Mt. Morrison Pendant, Sierra Nevada, Caliufornia	HnHf	CON	CSI										1						1											1										1								1
Ferry-2001-20A	Mt. Morrison Pendant, Sierra Nevada, Caliufornia	HnHf	CON	CSI										1						1											1																		1
Ferry-2001-20G	Mt. Morrison Pendant, Sierra Nevada, Caliufornia	HnHf	CON	CSI										1						1											1																		1
Ferry-2001-20K	Mt. Morrison Pendant, Sierra Nevada, Caliufornia	HnHf	CON	CSI				1						1						1											1																		1
Ferry-2001-20M	Mt. Morrison Pendant, Sierra Nevada, Caliufornia	HnHf	CON	CSI										1						1											1																		1
Ferry-2001-24A	Mt. Morrison Pendant, Sierra Nevada, Caliufornia	HnHf	CON	CSI				1						1						1	1										1										1								1
Ferry-2001-28N	Mt. Morrison Pendant, Sierra Nevada, Caliufornia	HnHf	CON	CSI										1						1											1																		1
Ferry-2001-28O	Mt. Morrison Pendant, Sierra Nevada, Caliufornia	HnHf	CON	CSI										1						1											1										1								1
Ferry-2001-29F-H	Mt. Morrison Pendant, Sierra Nevada, Caliufornia	HnHf	CON	CSI											1					1	1										1										1								1
Ferry-2001-29F-S	Mt. Morrison Pendant, Sierra Nevada, Caliufornia	HnHf	CON	CSI				1							1					1	1										1																		1
Ferry-2001-30A2	Mt. Morrison Pendant, Sierra Nevada, Caliufornia	HnHf	CON	CSI											1					1	1										1																		1
Ferry-2001-30A5-H	Mt. Morrison Pendant, Sierra Nevada, Caliufornia	HnHf	CON	CSI				1							1					1	1										1										1								1
Ferry-2001-30A5-S	Mt. Morrison Pendant, Sierra Nevada, Caliufornia	HnHf	CON	CSI											1					1	1										1										1								1
Ferry-2001-30B	Mt. Morrison Pendant, Sierra Nevada, Caliufornia	HnHf	CON	CSI											1					1											1																		1
Ferry-2001-30N	Mt. Morrison Pendant, Sierra Nevada, Caliufornia	HnHf	CON	CSI											1					1	1										1										1								1
Ferry-2001-30Q	Mt. Morrison Pendant, Sierra Nevada, Caliufornia	HnHf	CON	CSI											1					1	1										1										1								1
Ferry-2001-31B	Mt. Morrison Pendant, Sierra Nevada, Caliufornia	HnHf	CON	CSI											1					1	1										1										1								1
Ferry-2001-9A	Mt. Morrison Pendant, Sierra Nevada, Caliufornia	HnHf	CON	CSI										1						1											1																		1
Ferry-2002-E10A	Aureole, Monzoni, Contrin Fm., Italy	HbHn	CON	CAR										1					1	1												1				1
Ferry-2002-E10F	Aureole, Monzoni, Contrin Fm., Italy	HbHn	CON	CAR										1					1	1												1				1										1
Ferry-2002-E12A	Aureole, Monzoni, Contrin Fm., Italy	HbHn	CON	CAR										1					1	1												1
Ferry-2002-E16A	Aureole, Monzoni, Contrin Fm., Italy	HbHn	CON	CAR										1						1												1
Ferry-2002-E19B	Aureole, Monzoni, Contrin Fm., Italy	HbHn	CON	CAR										1					1	1												1
Ferry-2002-E8A	Aureole, Monzoni, Bellerophon Fm., Italy	HbHn	CON	CAR										1			1			1		1										1
Ferry-2002-P10A	Aureole, Predazzo, Contrin Fm., Italy	HbHn	CON	CAR										1					1	1												1				1
Ferry-2002-P11A	Aureole, Predazzo, Contrin Fm., Italy	HbHn	CON	CAR										1					1	1												1
Ferry-2002-P1C	Aureole, Predazzo, Contrin Fm., Italy	HbHn	CON	CAR													1			1												1				1		1								1
Ferry-2002-P6B	Aureole, Predazzo, Contrin Fm., Italy	HbHn	CON	CAR										1					1	1												1
Ferry-2002-P9D	Aureole, Predazzo, Contrin Fm., Italy	HbHn	CON	CAR															1	1												1				1		1
Ferry-2002-W2D	Aureole, Monzoni, Bellerophon Fm., Italy	HbHn	CON	CAR										1			1		1	1												1				1		1								1
Ferry-2002-W2J	Aureole, Monzoni, Bellerophon Fm., Italy	HbHn	CON	CAR										1			1		1	1												1				1										1
Ferry-2002-W8B	Aureole, Monzoni, Bellerophon Fm., Italy	HbHn	CON	CAR										1			1		1	1												1				1										1
Ferry-2005-1	Carbonated metaperidotite, Val d'Efra, Switz.	Amph	OPH	UMA																		1		1
Ferry-2005-12	Carbonated metaperidotite, Val d'Efra, Switz.	Amph	OPH	UMA																		1		1
Ferry-2005-14	Carbonated metaperidotite, Val d'Efra, Switz.	Amph	OPH	UMA																		1		1
Ferry-2005-16B	Carbonated metaperidotite, Val d'Efra, Switz.	Amph	OPH	UMA																		1		1
Ferry-2005-16D	Carbonated metaperidotite, Val d'Efra, Switz.	Amph	OPH	UMA																		1		1
Ferry-2005-16H	Carbonated metaperidotite, Val d'Efra, Switz.	Amph	OPH	UMA																		1		1
Ferry-2005-16I2	Carbonated metaperidotite, Val d'Efra, Switz.	Amph	OPH	UMA																		1		1
Ferry-2005-16J	Carbonated metaperidotite, Val d'Efra, Switz.	Amph	OPH	UMA																		1		1
Ferry-2005-16M	Carbonated metaperidotite, Val d'Efra, Switz.	Amph	OPH	UMA																		1		1
Ferry-2005-3	Carbonated metaperidotite, Val d'Efra, Switz.	Amph	OPH	UMA																		1		1
Ferry-2005-7H	Carbonated metaperidotite, Val d'Efra, Switz.	Amph	OPH	UMA																		1		1
Ferry-2005-7S	Carbonated metaperidotite, Val d'Efra, Switz.	Amph	OPH	UMA									1									1		1
Ferry-2007-NHd1D	Gile Mountain Fm, Vermont	Gree	REG	SST			1							1			1			1													1					1									1
Ferry-2007-NHd1H	Gile Mountain Fm, Vermont	Gree	REG	SST			1							1			1					1											1					1
Ferry-2007-NHd1O	Gile Mountain Fm, Vermont	Gree	REG	PEL			1							1								1											1
Ferry-2007-Q1a	Gile Mountain Fm, Vermont	Gree	REG	PEL			1							1				1				1											1					1									1
Ferry-2007-Q1b	Gile Mountain Fm, Vermont	Gree	REG	PEL										1			1	1		1		1											1					1									1
Ferry-2007-Q1c	Gile Mountain Fm, Vermont	Gree	REG	PEL										1			1	1		1		1											1					1									1
Ferry-2007-Q1d	Gile Mountain Fm, Vermont	Gree	REG	CAR										1						1													1														1
Ferry-2007-Q1g	Gile Mountain Fm, Vermont	Gree	REG	SST			1							1			1	1		1		1											1					1									1
Ferry-2007-Q1h	Gile Mountain Fm, Vermont	Gree	REG	SST			1							1				1		1		1											1					1									1
Ferry-2007-Q1h	Gile Mountain Fm, Vermont	Gree	REG	SST			1							1				1		1		1											1														1
Ferry-2007-Q1j	Gile Mountain Fm, Vermont	Gree	REG	CAR			1							1			1			1													1					1									1
Ferry-2007-Q1p	Gile Mountain Fm, Vermont	Gree	REG	SST			1							1			1	1				1																1									1
Ferry-2007-Q1q	Gile Mountain Fm, Vermont	Gree	REG	PEL			1							1			1	1		1		1											1					1									1
Grapes, 018	Pyromet, Xenoliths, Mt. Etna, Italy	San	XEN	SST																								1
Grapes, 018	Pyromet, Xenoliths, Mt. Etna, Italy	San	XEN	PEL								1														1																					1
Grapes, 041	Pyromet, Quartzofeldspathic Rocks	San	CON	PEL																						1
Grapes, 041	Pyromet, Quartzofeldspathic Rocks	San	CON	PEL																						1
Grapes, 041	Pyromet, Quartzofeldspathic Rocks	San	CON	PEL																							1
Grapes, 041	Pyromet, Quartzofeldspathic Rocks	San	CON	PEL								1														1
Grapes, 041	Pyromet, Quartzofeldspathic Rocks	San	CON	PEL																						1
Grapes, 041	Pyromet, Quartzofeldspathic Rocks	San	CON	PEL								1				1
Grapes, 041	Pyromet, Quartzofeldspathic Rocks	San	CON	PEL								1														1
Grapes, 049	Pyromet, Arkosic SS, Karoo, South Africa	San	CON	SST																						1
Grapes, 049	Pyromet, Feldspathic SS, Karoo, South Africa	San	CON	SST																						1
Grapes, 051	Pyromet, Feldspathic SS, Karoo, South Africa	San	CON	SST																						1
Grapes, 052	Pyromet, Triassic SS, Apsley, Tasmania	San	CON	SST																						1	1
Grapes, 053	Pyromet, metapelite, Glenmore, Scotland	San	CON	PEL
Grapes, 053	Pyromet, Triassic SS, Apsley, Tasmania	San	CON	SST																						1
Grapes, 053	Pyromet, Triassic SS, Apsley, Tasmania	San	CON	SST																							1
Grapes, 054	Pyromet, metapelite, Glenmore, Scotland	San	CON	PEL												1										1
Grapes, 054	Pyromet, metapelite, Glenmore, Scotland	San	CON	PEL
Grapes, 057	Pyromet, Arkosic SS, Island of Soay, Scotland	San	CON	SST																						1
Grapes, 057	Pyromet, metapelite, Island of Arran, Scotland	San	CON	PEL																						1																		1
Grapes, 058	Pyromet, pyroxene buchite, Antrim, No. Ireland	San	CON	PEL												1																											1				1
Grapes, 058	Pyromet, mullite buchite, Antrim, No. Ireland	San	CON	PEL																						1																					1
Grapes, 058	Pyromet, cordierite buchite, Antrim, No. Ireland	San	CON	PEL																						1																	1				1
Grapes, 059	Pyromet, osumilite buchite, Antrim, No. Ireland	San	CON	PEL																						1																					1
Grapes, 060	Pyromet, silicious buchite, Islnd of Mull, Scotland	San	CON	PEL												1										1
Grapes, 060	Pyromet, sillimanite buchite, Islnd of Mull, Scot.	San	CON	PEL
Grapes, 060-061	Pyromet, cordierite buchite, Islnd of Mull, Scot.	San	CON	PEL								1														1	1
Grapes, 061	Pyromet, mullite buchite, Islnd of Mull, Scot.	San	CON	PEL								1															1
Grapes, 061	Pyromet, mullite buchite, Islnd of Mull, Scot.	San	CON	PEL																							1																				1
Grapes, 063	Pyromet, buchite, Auckland NZ	San	CON	PEL												1										1
Grapes, 066	Pyromet, greenschist, Sithean Sluaigh	San	CON	GRE																						1
Grapes, 066	Pyromet, greenschist, Sithean Sluaigh	San	CON	GRE																							1
Grapes, 066	Pyromet, greenschist, Sithean Sluaigh	San	CON	GRE																						1																	1				1
Grapes, 066	Pyromet, greenschist, Sithean Sluaigh	San	CON	GRE																																							1				1
Grapes, 066	Pyromet, greenschist, Sithean Sluaigh	San	CON	GRE								1															1
Grapes, 066	Pyromet, greenschist, Sithean Sluaigh	San	CON	GRE																							1
Grapes, 068	Pyromet, Aluminous Xenoliths, Bushveld	San	XEN	PEL
Grapes, 068	Pyromet, Aluminous Xenoliths, Bushveld	San	XEN	PEL																							1
Grapes, 068	Pyromet, Aluminous Xenoliths, Bushveld	San	XEN	PEL																							1
Grapes, 068	Pyromet, Aluminous Xenoliths, Bushveld	San	XEN	PEL								1
Grapes, 070	Pyromet, metapelites, Skaergaard	San	CON	PEL																						1	1
Grapes, 070	Pyromet, metapelites, Skaergaard	San	CON	PEL																							1																				1
Grapes, 070	Pyromet, metapelites, Skaergaard	San	CON	PEL																							1
Grapes, 072	Pyromet, Xenoliths, Ngauruhoe, NZ	San	XEN	PEL								1
Grapes, 072	Pyromet, Xenoliths, Ngauruhoe, NZ	San	XEN	PEL																						1																					1
Grapes, 073	Pyromet, metapelite, Ross of Mull, Scotland	San	CON	PEL																						1
Grapes, 073	Pyromet, metapelite, Ross of Mull, Scotland	San	CON	PEL																							1																				1
Grapes, 073	Pyromet, metapelite, Ross of Mull, Scotland	San	CON	PEL														1									1
Grapes, 073	Pyromet, metapelite, Ross of Mull, Scotland	San	CON	PEL														1																										1
Grapes, 075-080	Pyromet, Xenoliths, Eifel, Germany	San	XEN	PEL								1						1								1	1																				1
Grapes, 075-080	Pyromet, Xenoliths, Eifel, Germany	San	XEN	PEL								1						1								1																					1
Grapes, 075-080	Pyromet, Xenoliths, Eifel, Germany	San	XEN	PEL														1									1																	1			1
Grapes, 075-080	Pyromet, Xenoliths, Eifel, Germany	San	XEN	PEL														1																										1			1
Grapes, 075-080	Pyromet, Xenoliths, Eifel, Germany	San	XEN	PEL																							1																	1			1
Grapes, 075-080	Pyromet, Xenoliths, Eifel, Germany	San	XEN	PEL								1						1									1
Grapes, 075-080	Pyromet, Xenoliths, Eifel, Germany	San	XEN	PEL					1	1
Grapes, 081-084	Pyromet, Sanidinite, Eifel, Germany	San	XEN	PEL														1									1																	1			1
Grapes, 084	Pyromet, Sanidinite, Mt. Amiata, Itlay	San	XEN	PEL						1								1									1													1							1
Grapes, 084-087	Pyromet, granitoid xenolith, Iceland	San	XEN	ACI								1														1
Grapes, 084-087	Pyromet, granitoid xenolith, Iceland	San	XEN	ACI
Grapes, 087-091	Pyromet, granodiorite xenolith, Sierra Nevada CA	San	XEN	INT																																													1
Grapes, 087-091	Pyromet, granodiorite xenolith, Sierra Nevada CA	San	XEN	INT																						1
Grapes, 087-091	Pyromet, granodiorite xenolith, Sierra Nevada CA	San	XEN	INT			1											1
Grapes, 087-091	Pyromet, granodiorite xenolith, Sierra Nevada CA	San	XEN	INT			1									1
Grapes, 118-119	Pyromet, calc silicates, various	San	CON	CAR																1																1
Grapes, 118-119	Pyromet, calc silicates, various	San	CON	CAR																1																1
Grapes, 118-119	Pyromet, calc silicates, various	San	CON	CSI																											1
Grapes, 118-119	Pyromet, calc silicates, various	San	CON	CSI								1																			1											1
Grapes, 118-119	Pyromet, calc silicates, various	San	CON	CSI																											1
Grapes, 118-119	Pyromet, calc silicates, various	San	CON	CAR																1
Grapes, 118-119	Pyromet, calc silicates, various	San	CON	CSI
Grapes, 118-119	Pyromet, calc silicates, various	San	CON	CAR																1
Grapes, 118-119	Pyromet, calc silicates, various	San	CON	CSI																											1
Grapes, 118-119	Pyromet, calc silicates, various	San	CON	CAR																1
Grapes, 118-119	Pyromet, calc silicates, various	San	CON	CAR																1
Grapes, 118-119	Pyromet, calc silicates, various	San	CON	CSI
Grapes, 118-119	Pyromet, calc silicates, various	San	CON	CAR																1
Grapes, 118-119	Pyromet, calc silicates, various	San	CON	CSI
Grapes, 118-119	Pyromet, calc silicates, various	San	CON	CSI
Grapes, 118-119	Pyromet, calc silicates, various	San	CON	CSI
Grapes, 122	Pyromet, calc silicates, various	San	CON	CSI
Grapes, 122	Pyromet, calc silicates, various	San	CON	CSI
Grapes, 126	Pyromet, dolostone, various	San	CON	CAR																											1					1													1
Grapes, 126	Pyromet, dolostone, various	San	CON	CAR																											1					1
Grapes, 126	Pyromet, dolostone, various	San	CON	CAR							1	1																			1
Grapes, 126	Pyromet, dolostone, various	San	CON	CAR
Grapes, 131-134	Pyromet, Silicieous limestone, Christmas Mtns, TX	San	CON	CAR																1
Grapes, 131-134	Pyromet, Silicieous limestone, Christmas Mtns, TX	San	CON	CAR																1
Grapes, 131-134	Pyromet, Silicieous limestone, Christmas Mtns, TX	San	CON	CAR																1
Grapes, 131-134	Pyromet, Silicieous limestone, Christmas Mtns, TX	San	CON	CAR																1
Grapes, 131-134	Pyromet, Silicieous limestone, Christmas Mtns, TX	San	CON	CAR																1
Grapes, 134	Pyromet, Silicieous limestone, Kilchoan, Scotland	San	CON	CSI
Grapes, 134	Pyromet, Silicieous limestone, Kilchoan, Scotland	San	CON	CSI
Grapes, 134	Pyromet, Silicieous limestone, Tokatoka, NZ	San	CON	CSI																																					1
Grapes, 134	Pyromet, Silicieous limestone, Kilchoan, Scotland	San	CON	CSI
Grapes, 134	Pyromet, Silicieous limestone, Kilchoan, Scotland	San	CON	CSI
Grapes, 134	Pyromet, Silicieous limestone, Kilchoan, Scotland	San	CON	CSI
Grapes, 136	Pyromet, Silicieous limestone, Marble Canyn, TX	San	CON	CSI
Grapes, 138	Pyromet, Silicieous limestone, Scawt Hill	San	CON	CSI
Grapes, 138	Pyromet, Silicieous limestone, Scawt Hill	San	CON	CSI
Grapes, 138	Pyromet, Silicieous limestone, Scawt Hill	San	CON	CSI
Grapes, 138	Pyromet, Silicieous limestone, Scawt Hill	San	CON	CSI
Grapes, 139	Pyromet, calc silicates, Siberian Traps	San	CON	CSI
Grapes, 139-141	Pyromet, calc silicates, Carneal, No. Ireland	San	CON	CSI
Grapes, 139-141	Pyromet, calc silicates, Carneal, No. Ireland	San	CON	CSI
Grapes, 139-141	Pyromet, calc silicates, Carneal, No. Ireland	San	CON	CSI
Grapes, 139-141	Pyromet, calc silicates, Carneal, No. Ireland	San	CON	CSI
Grapes, 142	Pyromet, calc silicates, Muck	San	CON	CAR																1
Grapes, 142	Pyromet, calc silicates, Muck	San	CON	CAR																1
Grapes, 142	Pyromet, calc silicates, Muck	San	CON	CAR																1
Grapes, 142	Pyromet, calc silicates, Muck	San	CON	CAR																1
Grapes, 142	Pyromet, calc silicates, Muck	San	CON	CAR																1
Grapes, 142	Pyromet, calc silicates, Muck	San	CON	CAR																1
Grapes, 142	Pyromet, calc silicates, Muck	San	CON	CSI
Grapes, 142-144	Pyromet, calc silicates, Christmas Mountains	San	CON	CSI
Grapes, 142-144	Pyromet, calc silicates, Christmas Mountains	San	CON	CSI
Grapes, 142-144	Pyromet, calc silicates, Christmas Mountains	San	CON	CSI
Grapes, 142-144	Pyromet, calc silicates, Christmas Mountains	San	CON	CAR																1
Grapes, 142-144	Pyromet, calc silicates, Christmas Mountains	San	CON	CSI
Grapes, 144-145	Pyromet, calc silicates, Flekkeren, Norway	San	CON	CAR																1											1									1	1
Grapes, 144-145	Pyromet, calc silicates, Flekkeren, Norway	San	CON	CSI																											1										1
Grapes, 145-146	Pyromet, calc silicates, Santorini	San	CON	CSI							1
Grapes, 146-147	Pyromet, calc silicates, La Soufriere, St. Vincent	San	CON	CAR							1	1								1											1
Grapes, 148	Pyromet, calc silicates, Eifel	San	CON	CSI
Grapes, 148	Pyromet, calc silicates, Eifel	San	CON	CAR																1
Grapes, 148-151	Pyromet, calc silicates, Bushveld	San	CON	CSI																											1					1
Grapes, 148-151	Pyromet, calc silicates, Bushveld	San	CON	CSI																																1
Grapes, 148-151	Pyromet, calc silicates, Bushveld	San	CON	CAR																1																1
Grapes, 148-151	Pyromet, calc silicates, Bushveld	San	CON	CSI																																1
Grapes, 148-151	Pyromet, calc silicates, Bushveld	San	CON	CSI																											1					1
Grapes, 148-151	Pyromet, calc silicates, Bushveld	San	CON	CSI																											1					1
Grapes, 148-151	Pyromet, calc silicates, Bushveld	San	CON	CAR																1																1
Grapes, 148-151	Pyromet, calc silicates, Bushveld	San	CON	CAR																1																1
Grapes, 148-151	Pyromet, calc silicates, Bushveld	San	CON	CAR																1
Grapes, 148-151	Pyromet, calc silicates, Bushveld	San	CON	CAR																1
Grapes, 148-151	Pyromet, calc silicates, Bushveld	San	CON	CSI																											1
Grapes, 148-151	Pyromet, calc silicates, Bushveld	San	CON	CAR																1
Grapes, 148-151	Pyromet, calc silicates, Bushveld	San	CON	CSI
Grapes, 148-151	Pyromet, calc silicates, Bushveld	San	CON	CAR																1
Grapes, 151-152	Pyromet, calc silicates xeno, Brome Mountain, Que	San	XEN	CAR																1											1
Grapes, 151-152	Pyromet, calc silicates xeno, Brome Mountain, Que	San	XEN	CAR																1											1
Grapes, 152-153	Pyromet, dolomite xeno, Kiglapait, Labrador	San	XEN	CAR																											1					1
Grapes, 152-153	Pyromet, dolomite xeno, Kiglapait, Labrador	San	XEN	CAR																											1					1
Grapes, 153-155	Pyromet, dolomite xeno, Ioko-Dovyren, Russia	San	XEN	CAR																																1
Grapes, 153-155	Pyromet, dolomite xeno, Ioko-Dovyren, Russia	San	XEN	CAR																											1					1
Grapes, 168-169	Hornfels contact, metabasalt, Smartville, CA	San	CON	MAF												1																													1		1
Grapes, 168-169	Hornfels contact, metabasalt, Smartville, CA	San	CON	MAF												1																															1
Grapes, 168-169	Hornfels contact, metabasalt, Smartville, CA	San	CON	MAF												1																															1
Grapes, 169	Pyrometa, metabasalt, Bunowen, Ireland	San	CON	MAF												1
Grapes, 169	Metabasalt, Bunowen, Ireland	San	CON	MAF	1																	1												1
Grapes, 170-171	Hornfels, contact metabasalt, Skye, Scotland	San	CON	MAF												1		1																			1										1
Grapes, 170-172	Hornfels, contact metabasat, Skaergaard	San	CON	MAF												1		1																			1										1
Grapes, 172-174	Pyrometa, zeolite/calcite, 'S Airde Beinn, Scotland	San	CON	ZEO		1
Grapes, 172-174	Pyrometa, zeolite/calcite, 'S Airde Beinn, Scotland	San	CON	ZEO																1
Grapes, 172-174	Pyrometa, zeolite/calcite, 'S Airde Beinn, Scotland	San	CON	ZEO
Grapes, 172-174	Pyrometa, zeolite/calcite, 'S Airde Beinn, Scotland	San	CON	ZEO		1
Grapes, 172-174	Pyrometa, zeolite/calcite, 'S Airde Beinn, Scotland	San	CON	ZEO
Grapes, 172-174	Pyrometa, zeolite/calcite, 'S Airde Beinn, Scotland	San	CON	ZEO												1
Grapes, 172-174	Pyrometa, zeolite/calcite, 'S Airde Beinn, Scotland	San	CON	ZEO																																									1
Grapes, 175-177	Pyrometa, zeolite/calcite, Scawt Hill, No. Ireland	San	CON	ZEO																																	1										1
Grapes, 175-177	Pyrometa, meta-basalt, Scawt Hill, No. Ireland	San	CON	MAF												1																					1
Grapes, 175-177	Pyrometa, zeolite/calcite, Scawt Hill, No. Ireland	San	CON	ZEO												1																															1
Grapes, 175-177	Pyrometa, zeolite/calcite, Scawt Hill, No. Ireland	San	CON	ZEO
Grapes, 175-177	Pyrometa, zeolite/calcite, Scawt Hill, No. Ireland	San	CON	ZEO
Grapes, 175-177	Pyrometa, zeolite/calcite, Scawt Hill, No. Ireland	San	CON	ZEO
Grapes, 178	Pyrometa, weathered mafics, various	San	CON	MAF																							1	1															1	1			1
Grapes, 178-180	Pyrometa, weathered mafics, Tievbulliagh, No. Ire.	San	CON	MAF																							1	1																1			1
Grapes, 178-180	Pyrometa, weathered mafics, Tievbulliagh, No. Ire.	San	CON	MAF																							1	1															1	1
Grapes, 178-180	Pyrometa, weathered mafics, Tievbulliagh, No. Ire.	San	CON	MAF								1														1		1															1
Grapes, 178-180	Pyrometa, weathered mafics, Tievbulliagh, No. Ire.	San	CON	MAF																																											1
Grapes, 178-180	Pyrometa, weathered mafics, Tievbulliagh, No. Ire.	San	CON	MAF																								1																1
Grapes, 180-181	Pyrometa, weathered mafics, Rathlin Island, NI	San	CON	MAF																						1																		1
Grapes, 181	Pyrometa, weathered mafics, Cascades, Oregon	San	CON	MAF																							1	1																1
Grapes, 181	Pyrometa, weathered mafics, Cascades, Oregon	San	CON	MAF																								1																1
Grapes, 181-183	Pyrometa, laterites, Southeast China	San	CON	PEL																																								1			1
Grapes, 183-184	Pyrometa, Al-rich ultramafics, various	San	CON	UMA																																1
Grapes, 183-184	Pyrometa, Al-rich ultramafics, various	San	CON	UMA																						1										1
Grapes, 183-184	Pyrometa, Al-rich ultramafics, various	San	CON	UMA																						1										1
Grapes, 183-184	Pyrometa, Al-rich ultramafics, various	San	CON	UMA																						1
Grapes, 184-185	Pyrometa, chromitite, Tari-Misaka, Japan	San	CON	CHR																																1
Grapes, 184-185	Pyrometa, chromitite, Tari-Misaka, Japan	San	CON	CHR																						1										1
Grapes, 185-188	Pyrometa, Andesite xenoliths, White Island, NZ	San	XEN	INT																						1		1															1
Grapes, 188	Andesite xenoliths, Ruapehu, NZ	San	XEN	INT																						1
Grapes, 188	Andesite xenoliths, Ruapehu, NZ	San	XEN	INT								1																														1
Grapes, 188	Andesite xenoliths, Ruapehu, NZ	San	XEN	INT
Grapes, 228	Muscovite thermal alteration	San	CON	MUS														1
Grapes, 228	Muscovite thermal alteration	San	CON	MUS														1									1
Grapes, 228	Muscovite thermal alteration	San	CON	MUS
Grapes, 228	Muscovite thermal alteration	San	CON	MUS														1
Grapes, 228	Muscovite thermal alteration	San	CON	MUS																							1
Grapes, 234	Chlorite thermal alteration	San	CON	CHL														1				1				1
Grapes, 234	Chlorite thermal alteration	San	CON	CHL																		1				1
Grapes, 234	Chlorite thermal alteration	San	CON	CHL																		1
Grapes, 235-237	Biotite thermal alteration	San	CON	BIO														1																			1
Grapes, 235-237	Biotite thermal alteration	San	CON	BIO																																	1
Grapes, 235-237	Biotite thermal alteration	San	CON	BIO														1
Grapes, 235-237	Biotite thermal alteration	San	CON	BIO			1											1
Grapes, 235-237	Biotite thermal alteration	San	CON	BIO														1
Grapes, 235-237	Biotite thermal alteration	San	CON	BIO														1
Grapes, 235-237	Biotite thermal alteration	San	CON	BIO														1
Grapes, 238-239	Hornblende thermal alteration	San	CON	HNB												1																					1								1
Grapes, 238-239	Hornblende thermal alteration	San	CON	HNB												1																													1
Grapes, 245-246	Almandine thermal breakdown	San	CON	ALM					1																																			1
Grapes, 245-246	Almandine thermal breakdown	San	CON	ALM					1									1									1
Grapes, 245-246	Almandine thermal breakdown	San	CON	ALM					1																		1
Grapes, 245-246	Almandine thermal breakdown	San	CON	ALM					1																	1									1									1
Grapes, 245-246	Almandine thermal breakdown	San	CON	ALM
Grapes, 247, 7.24	Staurolite thermal breakdown; porphyroblast	San	CON	STA					1									1																										1			1
Grapes, 248, 7.25	Staurolite thermal breakdown; porphyroblast	San	CON	STA														1																										1			1
Grapes, 248, 7.26	Staurolite thermal breakdown; xenolith	San	CON	STA									1
Grapes, 249	Staurolite thermal breakdown	San	CON	STA																																								1
Grapes, 249	Staurolite thermal breakdown	San	CON	STA																						1
Grapes, 249	Staurolite thermal breakdown	San	CON	STA					1
Grapes, 249	Staurolite thermal breakdown	San	CON	STA									1																															1
Grapes, 250	Staurolite thermal breakdown	San	CON	STA																																								1
Grapes, 250	Staurolite thermal breakdown	San	CON	STA					1																																			1
Grapes, 250	Staurolite thermal breakdown	San	CON	STA																							1																	1
Grapes, 251, 7.29	Cordierite thermal breakdown, Xenolith, Eifel	San	CON	COR														1								1																		1
H-Meta, 050A	Andalusite schist, Cumberlad	HbHn	REG	PEL						1								1				1
H-Meta, 050B	Cordierite schist, Westmoreland	HbHn	REG	PEL														1				1				1
H-Meta, 051A	Andalusite-Mica Schist, Killiney	HbHn	REG	PEL						1								1
H-Meta, 051B	Andalusite-Biotite-Hornfels, Perran Sands	HbHn	CON	PEL						1								1
H-Meta, 052A	Cordierite-Biotite-Hornfels, Skiddaw Slates	HbHn	CON	PEL														1								1
H-Meta, 052B	Cordierite-Biotite-Hornfels, Culm	HbHn	CON	PEL														1								1																					1
H-Meta, 054A	Hypersthene-Biotite-Cordierite Hornfels, Comrie	PyxHn	CON	PEL														1								1														1
H-Meta, 054B	Hypersthene-Biotite-Cordierite Hornfels, Comrie	PyxHn	CON	PEL														1								1
H-Meta, 056A,B	Biotite-Cordierite Hornfels, Cumberland	PyxHn	CON	PEL														1								1
H-Meta, 056C	Biotite-Cordierite Hornfels, Cumberland	PyxHn	CON	PEL					1									1								1
H-Meta, 057A	Hyperstenne-Orthoclase-Cordierite Hornfels	PyxHn	CON	PEL														1								1																							1
H-Meta, 057B	Hyperstenne-Orthoclase-Cordierite Hornfels	PyxHn	CON	PEL																						1																							1
H-Meta, 058A/B	Sillimanite-Cordierite Gneiss, N. Transvaal	Amph	CON	PEL						1								1								1																							1
H-Meta, 059A	Spinel-Orthoclase-Cordierite Hornfels, Comrie	Amph	CON	PEL																						1																							1
H-Meta, 059B	Corundum-Cordierite Hornfels, Comrie	PyxHn	CON	PEL																						1	1																						1
H-Meta, 060A	Garnet Gneiss, New Galloway	Amph	CON	PEL					1									1
H-Meta, 060B	Sillimanite Gneiss, New Galloway	Amph	CON	PEL					1									1																															1
H-Meta, 063A/B	Metamorphosed Bole, Kilchoan	PyxHn	CON	PEL								1															1																	1
H-Meta, 064A	Fayalite-Quartz Rock, Harz	PyxHn	CON	BFE																															1
H-Meta, 064B	Fayalite-Pleonaste Rock, Harz	PyxHn	CON	BFE							1							1								1									1
H-Meta, 067A	Quartzite, Isle of Mann	Amph	CON	SST
H-Meta, 067B	Grit, Colston Flags	Amph	CON	SST												1
H-Meta, 068A	Sandstone, Isle of Rum	Amph	CON	SST																																													1
H-Meta, 068B	Sandstone, Isle of Rum	Amph	CON	SST																																													1
H-Meta, 069A	Vitrified Sandstone, Isle of Soay	PyxHn	CON	SST																						1
H-Meta, 069B	Vitrified Sandstone, Isle of Rum	PyxHn	CON	SST																						1
H-Meta, 070A	Quartzite, Saxony	PyxHn	CON	SST														1																1
H-Meta, 070B	Quartzite, Saxony	PyxHn	CON	SST														1																															1
H-Meta, 071A	Metamorphosed Grit, Skiddaw	Amph	CON	SST														1
H-Meta, 071B	Metamorphosed Grit, Skiddaw	Amph	CON	SST					1									1
H-Meta, 072A	Metamorphosed Grit, New Galloway	Amph	CON	SST
H-Meta, 072B	Metamorphosed Grit, New Galloway	Amph	CON	SST					1									1																															1
H-Meta, 073A	Metamorphosed Grit, New Galloway	Amph	CON	SST														1								1
H-Meta, 073B	Metamorphosed Grit, New Galloway	Amph	CON	SST					1
H-Meta, 074A	Cordierite Gneiss, Saxony	Amph	CON	PEL														1								1
H-Meta, 074B	Cordierite Gneiss, Saxony	Amph	CON	PEL														1								1																							1
H-Meta, 078A	Meta-Dolomite, Pencatite, Skye	HbHn	CON	CAR																1
H-Meta, 078B	Ophicalcite, Ledbeg	HbHn	CON	CAR															1	1
H-Meta, 082A	Skarn, Skye	HbHn	CON	CAR																1																					1
H-Meta, 082B	Skarn, Menai Straits	HbHn	CON	CAR																1																					1
H-Meta, 085B	Diopside Rock, Broadford	PyxHn	CON	CSI																											1
H-Meta, 086A	Tremolite Marble, Skye	PyxHn	CON	CSI																1
H-Meta, 086B	Diopside Marble, Skye	PyxHn	CON	CSI																1											1
H-Meta, 087A/B	Marble, Crathie	PyxHn	CON	CSI																1											1										1
H-Meta, 090A	Lime-Silicate Rock, St. Austell	PyxHn	CON	CSI																																									1
H-Meta, 090B	Lime-Silicate Rock, Ivybridge	PyxHn	CON	CSI																											1
H-Meta, 090C	Lime-Silicate Rock, Camelford	PyxHn	CON	CSI																																					1
H-Meta, 092A	Calcareous Slates, Comrie	PyxHn	CON	CSI
H-Meta, 092B	Calcareous Slates, Comrie	PyxHn	CON	CSI
H-Meta, 095A	Wollastonite, Aberdeenshire	PyxHn	CON	CSI								1																			1
H-Meta, 095B	Wollastonite, Aberdeenshire	PyxHn	CON	CSI																																					1
H-Meta, 096A	Metadolomite, Tirol	PyxHn	CON	CSI																1
H-Meta, 096B	Metadolomite, Tirol	PyxHn	CON	CSI																1											1
H-Meta, 097A	Metachalk, Antrim	PyxHn	CON	CSI																1
H-Meta, 097B	Metachalk, Antrim	PyxHn	CON	CSI
H-Meta, 105A	Meta-Andesite, Wasdale Head	PyxHn	CON	MAF														1																											1				1
H-Meta, 105B	Meta-Gabbro, Caldbeck Falls	PyxHn	CON	MAF										1				1																											1
H-Meta, 106A	Metbasite, Longfell Gill	PyxHn	CON	MAF														1
H-Meta, 106B	Vogesite, Arran	PyxHn	CON	MAF										1																															1
H-Meta, 107A	Meta-Dolerite, Kilchrist	PyxHn	CON	MAF														1																											1
H-Meta, 107B	Meta-Dolerite, Torran	PyxHn	CON	MAF										1		1																													1
H-Meta, 109A/B	Meta-Basalt, Skye	PyxHn	CON	MAF												1
H-Meta, 110A	Meta-Basalt, Skye	PyxHn	CON	MAF												1
H-Meta, 110B	Meta-Andesite, Wasdale Pike	PyxHn	CON	MAF												1		1
H-Meta, 113A/B	Meta-Granite, British Guiana	PyxHn	CON	ACI												1																																	1
H-Meta, 114A/B	Meta-Granite, Dundalk	PyxHn	CON	ACI														1																											1				1
H-Meta, 117A	Tourmalinized Mica Schist, Cornwall	Amph	CON	PEL						1
H-Meta, 117B	Tourmalinized Andalusite Schist, Cornwall	Amph	CON	PEL						1								1
H-Meta, 118A	Tourmalinized Mica Hornfels, Cornwall	HbHn	CON	PEL														1
H-Meta, 119A/B	Tourmalinized Quartz Schist, Isle of Man	HbHn	CON	PEL
H-Meta, 120A	Axinite-Andradite-Calcite, Cornwall	HbHn	CON	CSI							1									1
H-Meta, 120B	Axinite-Hedenbergite-Quartz, Cornwall	HbHn	CON	CSI																																						1
H-Meta, 122C	Muscovite Schist, Cornwall	Gree	CON	PEL														1
H-Meta, 123A	Meta-Limestone, Grange Irish	HbHn	CON	CSI																1											1
H-Meta, 123B	Meta-Limestone, Grange Irish	HbHn	CON	CSI																1
H-Meta, 124A	Idocrase Rock, Grange Irish	HbHn	CON	CSI
H-Meta, 124B	Idocrase Rock, Grange Irish	HbHn	CON	CSI																1
H-Meta, 125A	Scapolite Rock, Deercastle	HbHn	CON	CSI																																					1
H-Meta, 125B	Scapolite Rock, Deercastle	HbHn	CON	CSI																											1
H-Meta, 126A	Skarn, Oslo District	HbHn	CON	CSI							1
H-Meta, 126B	Skarn, Oslo District	HbHn	CON	CSI																1																						1
H-Meta, 128A	Lime-Iron-Silicate Rock, South Brent	HbHn	CON	CSI							1																															1
H-Meta, 128B	Lime-Iron-Silicate Rock, South Brent	HbHn	CON	CSI							1																															1
H-Meta, 129A	Adinole, Padstow, Cornwall	HbHn	CON	PEL			1
H-Meta, 129B	Adinole, Padstow, Cornwall	HbHn	CON	PEL			1													1
H-Meta, 129C	Adinole, Padstow, Cornwall	HbHn	CON	PEL			1																																								1
H-Meta, 131A	Albitized Rocks, Pyrenees	HbHn	CON	PEL			1													1
H-Meta, 131B	Quartz-Glaucophane Schist, New Caledonia	HbHn	CON	ACI			1																																1
H-Meta, 132A	Prehnitized Lime-Silicate Rocks, Aberdeensh.	Zeol	CON	CSI								1																			1										1
H-Meta, 132B	Prehnitized Lime-Silicate Rocks, Aberdeensh.	Zeol	CON	CSI																											1										1
H-Meta, 134A	Anthophyllite-Cordierite Schist, Cornwall	HbHn	CON	INT									1													1																					1
H-Meta, 134B	Anthophyllite-Cordierite Schist, Cornwall	HbHn	CON	INT									1													1
H-Meta, 156A	Magnetite slate, Ardenne	Gree	REG	PEL																		1
H-Meta, 156B	Pyrite slate, Snowdon	Gree	REG	PEL																		1
H-Meta, 160A	Slate, North Wales	Gree	REG	PEL																		1																					1
H-Meta, 160B	Slate, North Wales	Gree	REG	PEL			1											1
H-Meta, 163A-C	Marble, Pyrennees	Gree	REG	CAR																1
H-Meta, 168	Cataclastic sheared rocks, various	Gree	SHE	PEL			1
H-Meta, 169	Mylonite, Sutherland	Gree	SHE	PEL			1
H-Meta, 170	Sheared quartzite, Sutherland	Gree	SHE	SST
H-Meta, 171	Sheared limestone, North Devon	Gree	SHE	CAR																1
H-Meta, 173A	Lewisian Gneiss, Sutherland	Gree	SHE	PEL																																													1
H-Meta, 173B	Borolanite, Sutherland	Gree	SHE	AGP							1																																						1
H-Meta, 174A	Sausserite Eucrite, Moonbi	Gree	MET	MAF																											1
H-Meta, 174B	Sausserite-Actinolite Gabbro, Bingara	Gree	MET	PEL	1		1
H-Meta, 175A	Schistose Quartz Porphyry, Lianberis	Gree	SHE	SST
H-Meta, 175B	Sheared Dolerite, Isle of Mann	Gree	SHE	INT																1														1
H-Meta, 175C	Schistose Dolerite, Garth	Gree	SHE	INT																		1																									1
H-Meta, 191A	Garnet schist, Inverness-shire	Amph	REG	PEL					1									1
H-Meta, 192/193	Garnet schist, Perthshire	Amph	REG	PEL					1													1
H-Meta, 195A/B	Garnet-graphite schist, Perthshire	Amph	REG	PEL					1									1																						1
H-Meta, 196B	Micaceous Quatzite, Argyllshire	Amph	REG	SST																																													1
H-Meta, 198A/B	Zoisite-Amphibolite, Bergen	Amph	REG	PEL																																									1				1
H-Meta, 200A	Sericite phyllite, Loch Leven	Amph	REG	PEL														1
H-Meta, 200B	Tremolite Schist, Sutherland	Amph	REG	MAF
H-Meta, 200C	Magnetite-Biotite-Granulite, Inverness-shire	Gran	REG	SST														1																															1
H-Meta, 201A	Garnet Granulite, Rohrsdorf	Gran	REG	ACI					1									1																															1
H-Meta, 201B	Pyroxene Granulite, Hartsmannsdorf	Gran	REG	MAF					1
H-Meta, 202A	Hornblende Schist, Valais	Amph	REG	MAF														1																											1		1
H-Meta, 202B	Hornblende Schist, Tieino	Amph	REG	MAF														1																1											1				1
H-Meta, 205B	Mica Schist, Perthshire	Amph	REG	PEL					1									1																															1
H-Meta, 206A	Calc-Mica Schist, Argyllshire	Amph	REG	CSI					1											1
H-Meta, 206B	Calc-Hornblende Schist, Perthshire	Amph	REG	CSI														1		1																									1
H-Meta, 210A/B	Chlorite-Sericite Schist, North Cornwall	Gree	REG	PEL																		1																									1
H-Meta, 211B	Chlorite-Sericite Schist, Loch Awe	Gree	REG	PEL			1															1
H-Meta, 213A	Albite-Chlorite-Sericite Schist, Loch Lomond	Gree	REG	PEL			1															1
H-Meta, 213B	Chloritoid-Sericite Schist, North Cornwall	Gree	REG	PEL																			1																								1
H-Meta, 215A	Biotite-Chlorite Schist, Argyllshire	Gree	REG	PEL														1				1
H-Meta, 215B	Biotite-Sericite Schist, Loch Leven	Gree	REG	PEL														1
H-Meta, 216A	Biotite-Sericite Schist, Forfarshire	Gree	REG	PEL														1
H-Meta, 216B	Chloritoid-Sericite Schist, Kincardlineshire	Gree	REG	PEL																		1
H-Meta, 217A	Chloritoid-Chlorite Schist, Piedmont	Gree	REG	PEL																		1	1
H-Meta, 217B	Garnet-Chlorite Schist, Tirol	Gree	REG	PEL					1													1
H-Meta, 218A	Garnet-Chlorite-Muscovite Schist, Stavanger	Gree	REG	PEL			1		1													1
H-Meta, 218B	Garnet-Chlorite-Muscovite Schist, Stavanger	Gree	REG	PEL			1		1													1																		1
H-Meta, 220A/B	Garnet Gneiss, Perthshire	Amph	REG	PEL					1																															1
H-Meta, 221A	Staurolite Phyllite, Somascona	Amph	REG	PEL														1
H-Meta, 221B	Garnet Mica schist, Airolo	Amph	REG	PEL					1
H-Meta, 222A	Garnet Mica schist, Perthshie	Amph	REG	PEL					1									1
H-Meta, 222B	Garnet Mica schist, Perthshie	Amph	REG	PEL					1
H-Meta, 223A	Phyllite, Argyllshire	Amph	REG	PEL
H-Meta, 223B	Cordierite-Muscovite Gneiss, Banffshire	Amph	REG	PEL						1								1								1
H-Meta, 223B	Phyllite, Argyllshire	Amph	REG	PEL					1
H-Meta, 226A	Staurolite-Garnet-Mica Schist, Forfarshire	Amph	REG	PEL					1									1																															1
H-Meta, 226B	Kyanite-Garnet-Mica Schist, Perthshire	Amph	REG	PEL					1
H-Meta, 227A	Staurolite Gneiss, Forfarshire	Amph	REG	PEL														1
H-Meta, 227B	Kyanite Gneiss, Ross of Mull	Amph	REG	PEL														1
H-Meta, 228A	Sillimanite Gneiss, Forfarshire	Amph	REG	PEL
H-Meta, 228B	Sillimanite Gneiss, Forfarshire	Amph	REG	PEL														1
H-Meta, 231A/B	Biotite-Sericite Schist, Stonehaven	Amph	REG	PEL														1																															1
H-Meta, 232A	Andalusite-Biotite Schist, Fyvie	Amph	REG	PEL						1								1
H-Meta, 232B	Andalusite-Staurolite Schist, Banff	Amph	REG	PEL						1								1
H-Meta, 233A/B	Cordierite Gneiss, Aberdeenshire	Amph	REG	PEL														1								1																							1
H-Meta, 237A	Emery, Naxos	Amph	REG	BAU																							1
H-Meta, 237B	Emery, Naxos	Amph	REG	BAU																			1				1
H-Meta, 237C	Emery, Naxos	Amph	REG	BAU																			1				1
H-Meta, 238A	Eulysite, Tunaberg, Sweden	Amph	REG	UMA					1																										1							1
H-Meta, 238B	Eulysite, Collabrieres	Amph	REG	UMA					1																										1
H-Meta, 240A	Meta-Mn Sediments, India	Amph	REG	FEM
H-Meta, 240B	Meta-Mn Sediments, India	Amph	REG	FEM										1		1
H-Meta, 241A	Schistose Grits, Argyllshire	Amph	REG	SST
H-Meta, 241B	Schistose Grits, Arran	Amph	REG	SST																														1
H-Meta, 242A	Schistose Grits, Argyllshire	Amph	REG	SST																		1
H-Meta, 242B	Schistose Grits, Arran	Amph	REG	SST			1
H-Meta, 243A/B	Albitic Schist, Loch Lomand	Amph	REG	SST			1															1
H-Meta, 244A	Quartzite, Loch Lomand	Amph	REG	SST																1		1																			1
H-Meta, 244B	Quartzite, Glen Clunie	Amph	REG	SST																		1																											1
H-Meta, 245A/B	Quartzite, Perthshire	Amph	REG	SST														1
H-Meta, 246A	Quartzose Mica Schist, Skye	Amph	REG	SST														1
H-Meta, 246B	Quartzose Mica Schist, Anglesey	Amph	REG	SST
H-Meta, 247A	Biotite Granulite, Inverness-shire	Gran	REG	PEL			1											1																															1
H-Meta, 247B	Garnet Granulite, Inverness-shire	Gran	REG	PEL			1		1									1
H-Meta, 249A	Garnet Gneiss, Forfarshire	Amph	REG	PEL					1									1																															1
H-Meta, 249B	Muscovite-Biotite-Gneiss, Forfarshire	Amph	REG	PEL			1							1				1
H-Meta, 253A	Marble, Liguria, Italy	Amph	REG	CAR																1
H-Meta, 253B	Dolomite Marble, Valais, Switzerland	Amph	REG	CAR																											1	1
H-Meta, 254A	Marble, Perthshire	Amph	REG	CAR																1
H-Meta, 254B	Marble, Perthshire	Amph	REG	CAR																											1	1
H-Meta, 255A	Lime-Silicate Rocks, Perthshire	Amph	REG	CSI																1											1										1
H-Meta, 255B	Lime-Silicate Rocks, Perthshire	Amph	REG	CSI																											1																		1
H-Meta, 257A	Dolomitic Marble, Inverness-shire	Amph	REG	CSI																1																1
H-Meta, 257B	Dolomitic Marble, Inverness-shire	Amph	REG	CSI																1											1	1								1
H-Meta, 258A	Meta-Dolomite, Ceylon	Amph	REG	CSI								1		1																	1
H-Meta, 258B	Meta-Dolomite, NY	Amph	REG	CSI																1																										1
H-Meta, 259A/B	Pyroxene-Spinel Roc, Ceylon	Amph	REG	CSI																1											1
H-Meta, 260A/B	Diopside-Quartz Rock, South Australia	Amph	REG	CSI																											1
H-Meta, 262A	Calcareous Schist, Argyllshie	Amph	REG	CSI			1													1		1
H-Meta, 262B	Calcareous Schist, Argyllshie	Amph	REG	CSI														1		1														1
H-Meta, 263A	Epidote-Mica Schist, Inverness-shire	Amph	REG	CSI																														1
H-Meta, 263B	Epidote-Mica Schist, Inverness-shire	Amph	REG	CSI					1																									1
H-Meta, 264A/B	Zoisite-Mica Schist, Argyllshire	Amph	REG	CSI														1
H-Meta, 265A	Tremolite-Mica Schist, Banffshire	Amph	REG	CSI
H-Meta, 265B	Biotite-Hornblende Schist, Gotthard	Amph	REG	CSI														1														1		1											1
H-Meta, 266A	Albite-Chlorite Schist, Loch Lubnaig	Amph	REG	PEL			1															1												1
H-Meta, 266B	Epidote-Albite-Biotite Schist, Loch Katrine	Amph	REG	PEL			1											1				1												1
H-Meta, 267A	Garnet Hornblende Schist, Perthshire	Amph	REG	PEL					1																																				1
H-Meta, 267B	Hornblende Schist, Forfarshire	Amph	REG	PEL																																									1
H-Meta, 269A	Epidosite, New Zealand	Amph	REG	PEL																														1
H-Meta, 269B	Amphibolite, Ontario	Amph	REG	PEL																																									1
H-Meta, 270A	Calc-Zoisite-Mica Schist, Perthshire	Amph	REG	CSI																1
H-Meta, 270B	Calc-Zoisite-Garnet Granulite, Inverness-shire	Amph	REG	CSI																1																					1
H-Meta, 271A/B	Hornblende Schist, Ross-shire	Amph	REG	PEL					1									1
H-Meta, 275A	Ultrabasic Schist, Shetland Isles	Amph	REG	UMA
H-Meta, 275B	Ultrabasic Schist, Shetland Isles	Amph	REG	UMA
H-Meta, 276A/B	Talc Schist, Tirol	Amph	REG	UMA
H-Meta, 278A	Tremolite Schist, Balta	Gree	REG	MAF
H-Meta, 278B	Anthophyllite Schist, Mainland	Gree	REG	MAF									1
H-Meta, 279A	Albite-Epidote-Chlorite Schist, South Devon	Gree	REG	MAF			1													1		1												1
H-Meta, 279B	Albite-Epidote-Chlorite Schist, South Devon	Gree	REG	MAF			1															1												1
H-Meta, 280A	Albite-Epidote-Hornblende Schist, Prawie	Amph	REG	MAF			1															1												1											1
H-Meta, 280B	Albite-Epidote-Hornblende Schist, Prawie	Amph	REG	MAF			1																											1											1
H-Meta, 281A/B	Albite-Epidote-Hornblende Schist, Highlands	Amph	REG	MAF			1															1												1											1
H-Meta, 282A	Plagioclase-Amphibolite, Cornwall	Amph	REG	MAF																											1			1											1
H-Meta, 282B	Plagioclase-Amphibolite, Cornwall	Amph	REG	MAF																											1														1
H-Meta, 283A	Plagioclase-Amphibolite, Perthshire	Amph	REG	MAF										1																															1
H-Meta, 283B	Plagioclase-Amphibolite, Perthshire	Amph	REG	MAF					1					1																															1
H-Meta, 284A	Epidote-Amphibolite, Perthshire	Amph	REG	MAF																														1											1
H-Meta, 284B	Garnet-Hornblende-Plag Gneiss, Glen Doll	Amph	REG	MAF					1																																				1
H-Meta, 286A	Amphibolite, Banffshire	Amph	REG	MAF																																									1
H-Meta, 286B	Amphibolite, Banffshire	Amph	REG	MAF										1				1																											1
H-Meta, 288A	Meta-Diorite, Sutherland	Amph	REG	INT										1				1																											1
H-Meta, 288B	Meta-Diorite, Sutherland	Amph	REG	INT			1											1																											1
H-Meta, 289A	Meta-Rhyolite, various	Amph	REG	ACI														1
H-Meta, 289B	Meta-Rhyolite, various	Amph	REG	ACI			1											1
H-Meta, 289C	Meta-Rhyolite, various	Amph	REG	ACI			1
H-Meta, 290A	Acid Granulite, Rohrsdorf	Amph	REG	ACI					1																																								1
H-Meta, 290B	Acid Granulite, Markersdorf	Amph	REG	ACI					1									1																															1
H-Meta, 290C	Prismatine-Albite Granulite, Waldheim	Gran	REG	AGP			1
H-Meta, 291A/B	Biotite Gneiss, Perthshire	Amph	REG	ACI														1																1															1
H-Meta, 293A	Glaucophane-Epidote Schist, Menai Straits	Amph	REG	AGP			1																											1					1
H-Meta, 293B	Biotite-Albite Schist, Fibbia	Amph	REG	AGP			1							1				1																1
H-Meta, 294A	Lawsonite-Glaucophane Schist, California	Amph	REG	AGP			1															1																	1
H-Meta, 294B	Muscovite-Glacophane Schist, California	Amph	REG	AGP																																			1
H-Meta, 296A	Nepheline-Syenite Gneiss, Madagascar	Amph	REG	AGP			1																																						1				1
H-Meta, 296B	Riebeckite Gneiss, Lower Austria	Amph	REG	AGP			1																																										1
H-Meta, 299A	Biotite-Oligoclase Gneiss, Forfarshire	HbHn	CON	PEL			1		1									1
H-Meta, 304A/B	Injection Gneiss, Aberdeenshire	HbHn	CON	PEL			1		1									1																															1
H-Meta, 305A/B	Injection Gneiss, Stockholm	HbHn	CON	PEL														1																															1
H-Meta, 306A	Meta-Peridotite, Ticino	Amph	REG	UMA																																1
H-Meta, 306B	Meta-Peridotite, Norway	Amph	REG	UMA									1																		1					1
H-Meta, 307A	Meta-Pyroxenite, Sutherland	Amph	REG	UMA												1																													1
H-Meta, 307B	Hornblende-Biotite Rock, South Rona	Amph	REG	UMA														1																											1
H-Meta, 308A	Eclogite, Inverness-shire	Eclo	HPM	UMA																																									1
H-Meta, 308B	Eclogite, Southerland	Eclo	HPM	UMA																																									1
H-Meta, 310A	Eclogite, Bavaria	Eclo	HPM	UMA
H-Meta, 310B	Glaucophane Eclogite, Piedmont	Eclo	HPM	UMA																														1					1						1
H-Meta, 311A	Hornblende-Plagioclase Gneiss, Loch Maddy	Amph	REG	MAF																																									1
H-Meta, 311B	Hornblende-Plagioclase Gneiss, Tarbert, Harris	Amph	REG	MAF												1																													1
H-Meta, 313A	Hypersthene-Plagioclase Gneiss, Sutherland	Amph	REG	INT										1				1																											1
H-Meta, 313B	Hypersthene-Plagioclase Gneiss, Sutherland	Amph	REG	INT														1																											1
H-Meta, 314A/B	Hornblende-Plag-Granulite, Sutherland	Gran	REG	INT			1											1																											1				1
H-Meta, 315A	Hornblende Gneiss, Sutherland	Amph	REG	INT										1																															1				1
H-Meta, 315B	Biotite-Epidote-Augen Gneiss, Ross	Amph	REG	INT			1											1																1
H-Meta, 316A	Muscovite Gneiss, Grantown, Elgin	Amph	REG	ACI					1									1																															1
H-Meta, 316B	Muscovite Gneiss, Keith, Banffshire	Amph	REG	ACI			1							1				1																															1
H-Meta, 317A/B	Garnet-Biotite Gneiss, Anglesey	Amph	REG	INT			1											1																															1
H-Meta, 320B	Granulitized Gabbro, Cornwall	Gran	REG	MAF												1
H-Meta, 321A	Meta-Nepeheline Syenite, Norway	Amph	REG	AGP												1		1
H-Meta, 321B	Meta-Nepeheline Syenite, Norway	Amph	REG	AGP			1											1																															1
H-Meta, 326A	Garnet-Albite-Mica Schist, Loch Lomand	HbHn	CON	REG			1		1																	1
H-Meta, 326B	Sillimanite Gneiss, Ross of Mull	HbHn	CON	REG			1			1								1								1																							1
H-Meta, 327A	Sillimanite-Cordierite-Biotite Hornfels, Argyllsh.	HbHn	CON	REG														1								1
H-Meta, 327B	Corundum-Spinel-Sill-Cord Hornfels, Aberdeensh.	PyxHn	CON	REG																						1	1
H-Meta, 329A/B	Thermally metamophosed gneiss, Ross of Mull	PyxHn	CON	REG					1					1				1								1
H-Meta, 330A	Thermally metamophosed calc-silicates, Aberd.	PyxHn	CON	REG																																					1
H-Meta, 330B	Thermally metamophosed calc-silicates, Aberd.	PyxHn	CON	REG																											1																		1
H-Meta, 332A	Thermally metamophosed amphibolite, Aberd	PyxHn	CON	REG												1		1																											1
H-Meta, 332B	Thermally metamophosed amphibolite, Perthsh.	PyxHn	CON	REG														1																											1
H-Meta, 334A/B	Ottrelite Schist, Ardenne	Amph	REG	PEL																			1																								1
H-Meta, 335A	Corneite, Biotite Hornfels, Belgium	HbHn	CON	PEL														1
H-Meta, 337A	Manx Slates, Isle of Mann	Amph	REG	PEL														1				1
H-Meta, 337B	Manx Slates, Isle of Mann	Amph	REG	PEL					1									1				1
H-Meta, 338A	Pyroxene Gneiss, Sutherland	Amph	REG	INT														1																											1
H-Meta, 338B	Meta-Dolerite, Sutherland	Amph	REG	INT																																									1
H-Meta, 339B	Meta-Dolerite, Sutherland	Amph	REG	INT					1					1				1																											1
H-Meta, 342A	Garnet Hornfels, Ross-shire	HbHn	CON	PEL					1									1																															1
H-Meta, 342B	Altered Garnet Hornfels, Ross-shire	HbHn	CON	PEL					1									1
H-Meta, 342C	Mica Schist, Ross-shire	HbHn	CON	PEL
H-Meta, 347A	Retrograde Calc-Silicate, Aberdeenshire	Amph	REG	CSI							1									1														1
H-Meta, 347B	Retrograde Calc-Silicate, Carlingford	Amph	REG	CSI	1																										1
H-Meta, 350B	Retrograde Pelitic, Glen Urquahart	Amph	REG	PEL														1
H-Meta, 352A	Retrograde Granite Gneiss, Eddystone Rock	Amph	REG	ACI					1									1																1															1
H-Meta, 356B	Kyanite Gneiss, Ross of Mull	Amph	REG	PEL														1
H-Meta, 357B	Garnet-Hornblende-Biotite Schist, Gairloch, Ross	Amph	REG	PEL					1									1																											1
H-Meta, 357C	Garnet-Albite-Mica Schist, Loch Dochart, Perth	Amph	REG	PEL			1		1									1
Harker, 255A	Sillimanite Gneiss, New Galloway	Amph	REG	PEL					1									1
Harker, 255B	Cordierite Gneiss, Lockwitz, Saxony	Amph	REG	PEL														1								1
Harker, 256B	Garnetiferous Mica Schist, Blair Athol	Amph	REG	PEL					1									1																						1
Harker, 257 text	Chiastolite Slate, Bannerdale, Skiddaw	Amph	REG	PEL						1								1								1														1
Harker, 257 text	Chiastolite Slate, Bannerdale, Skiddaw	Amph	REG	PEL					1	1								1				1																		1							1
Harker, 257 text	Mica Schist, Killiney	Amph	REG	PEL						1
Harker, 257 text	Slates, Comrie, Perthshire	Amph	REG	PEL																						1	1
Harker, 257 text	Slates, Comrie, Perthshire	Amph	REG	PEL																						1
Harker, 258 text	Mica Schist, various	Amph	REG	PEL														1																1											1
Harker, 258 text	Hornfels, various	AEHn	CON	PEL														1																													1		1
Harker, 258 text	Mica Schist, various	Amph	REG	PEL					1									1
Harker, 258A	Ottrelite Slate, Ottre, Belgium	Amph	REG	PEL																			1
Harker, 258B	Cordierite-Mica Schist, Wasdale Beck	Amph	REG	PEL														1								1
Harker, 259 text	Sillimanite Schist, various	Amph	REG	PEL														1																															1
Harker, 259A	Staurolite Schist, Glen Clova, Forfarshire	Amph	REG	PEL														1
Harker, 259B	Kyanite Schist, Glen Fernait, Perthshire	Amph	REG	PEL					1
Harker, 260 text	Mg-Al-Si-Marble, various	Amph	REG	CSI																1														1
Harker, 260 text	Silicious Marble, various	Amph	REG	CSI																1
Harker, 260 text	Mg-Al-Si-Marble, various	Amph	REG	CSI																1																					1
Harker, 260 text	Mg-Al-Si-Marble, various	Amph	REG	CSI																1											1
Harker, 260 text	Adinoles, Hartz District	AEHn	CON	PEL			1
Harker, 260 text	Mg-Al-Si-Marble, higher grade, various	Gran	REG	CSI								1								1
Harker, 260 text	Marble, various	Amph	REG	CAR																1
Harker, 261 text	Serpentine Marble, Tyrol	AEHn	CON	CSI																1
Harker, 261 text	Brucite Marble, Various	AEHn	CON	CSI															1	1
Harker, 261A	Forsterite Marble, Kilchrist, Skye	AEHn	CON	CSI																1																1
Harker, 262 text	Lime-Silicate Rock, various	HbHn	CON	CSI																											1
Harker, 262 text	Calcflintas, Cornwall and Devon	PyxHn	CON	CSI																											1										1
Harker, 262 text	Lime-Silicate Rock, various	HbHn	CON	CSI								1
Harker, 262 text	Calcflintas, Cornwall and Devon	PyxHn	CON	CSI								1				1																		1
Harker, 262 text	Lime-Silicate Rock, various	HbHn	CON	CSI																											1
Harker, 262 text	Lime-Silicate Rock, various	HbHn	CON	CSI								1																			1
Harker, 263 text	Andradite-Hedenbergite Skarn, Dartmoor	PyxHn	CON	CSI							1																															1
Harker, 264 text	Metamorphosed Basic Igneous, Shap	Amph	REG	MAF												1																		1											1
Harker, 264 text	Metamorphosed Basic Igneous, Shap	Amph	REG	MAF	1											1																		1							1				1
Harker, 265A	Metamorphosed Basic Lava, Carrock Fall	Amph	REG	MAF														1																											1
Harker, 266 text	Metagabbro, Cumberland	Amph	REG	MAF	1									1				1
Harker, 266 text	Metadolerite, Cornwall	Amph	REG	INT												1		1																											1		1
Harker, 266 text	Metabasalt, Skye and Mull	Amph	REG	MAF												1																													1
Harker, 266 text	Metagabbro, Cumberland	Amph	REG	MAF												1
Harker, 267 text	Amphibolite, various	Amph	REG	ACI					1																																				1
Harker, 267 text	Amphibolite, various	Amph	REG	ACI																1		1												1											1
Harker, 267A	Metadolerite, Skye	Amph	REG	INT														1				1																							1
Harker, 270B	Strained gabbro, Lizard, Cornwall	Amph	SHE	MAF	1
Harker, 270C	Strained Staurolite-Mica-Schist, Lepontine Alps	Amph	SHE	PEL
Harker, 271A	Hornblende Eclogite, Loch Laxfrd, Scotland	Eclo	SHE	MAF																																									1
Harker, 276 text	Sheared nepheline syenite, Assynt	Gree	SHE	SUB																		1
Harker, 276 text	Sheared nepheline syenite, Assynt	Gree	SHE	SUB																		1
Harker, 277 text	Sheared peridotite, Loch Assynt	Amph	SHE	UMA	1																											1
Harker, 277 text	Calc-chlorite schist, Devon	Amph	SHE	CSI			1													1		1
Harley-2021-527-Fig.4	General	Gran	UHT	PEL																						1
Harley-2021-527-Fig.4	General	Gran	UHT	PEL
Harley-2021-527-Fig.4	General	Gran	UHT	PEL																						1
Harley-2021-527-Fig.4	General	Gran	UHT	PEL																						1
Harley-2021-527-Fig.4	General	Gran	UHT	PEL																						1
Harley-2021-527-Fig.4	General	Gran	UHT	PEL																						1
Harley-2021-527-Fig.4	General	Gran	UHT	PEL
Harley-2021-527-Fig.4	General	Gran	UHT	PEL																						1
Harley-2021-527-Fig.4	General	Gran	UHT	PEL																						1					1
Harley-2021-527-Fig.4	General	Gran	UHT	PEL																						1
Harley-2021-527-Fig.4	General	Gran	UHT	PEL																						1
Harley-2021-527-Fig.4	General	Gran	UHT	PEL																						1
Harley-2021-530	Napier Complex, Antarctica	Gran	UHT	PEL
Harley-2021-531-Fig.9	General	Gran	UHT	PEL
Harley-2021-531-Fig.9	General	Gran	UHT	PEL																						1																					1
Harley-2021-531-Fig.9	General	Gran	UHT	PEL
Harley-2021-531-Fig.9	General	Gran	UHT	PEL																						1
Harley-2021-531-Fig.9	General	Gran	UHT	PEL														1
Harley-2021-531-Fig.9	General	Gran	UHT	PEL
Harley-2021-531-Fig.9	General	Gran	UHT	PEL
Harley-2021-531-Fig.9	General	Gran	UHT	PEL
Harley-2021-531-Fig.9	General	Gran	UHT	PEL														1																													1
Harley-2021-531-Fig.9	General	Gran	UHT	PEL																																											1
Harley-2021-531-Fig.9	General	Gran	UHT	PEL														1
Harley-2021-531-Fig.9	General	Gran	UHT	PEL																						1
Harley-2021-531-Fig.9	General	Gran	UHT	PEL														1
Harley-2021-531-Fig.9	General	Gran	UHT	PEL
Harley-2021-531-Fig.9	General	Gran	UHT	PEL
Harley-2021-531-Fig.9	General	Gran	UHT	PEL														1
Harley-2021-531-Fig.9	General	Gran	UHT	PEL														1
Harley-2021-531-Fig.9	General	Gran	UHT	PEL																						1																					1
Harley-2021-531-Fig.9	General	Gran	UHT	PEL														1																													1
Harley-2021-531-Fig.9	General	Gran	UHT	PEL																																											1
Harley-2021-531-Fig.9	General	Gran	UHT	PEL														1
Harley-2021-531-Fig.9	General	Gran	UHT	PEL														1
Harley-2021-531-Fig.9	General	Gran	UHT	PEL																						1
Harley-2021-531-Fig.9	General	Gran	UHT	PEL																						1
Harley-2021-531-Fig.9	General	Gran	UHT	PEL
Harley-2021-531-Fig.9	General	Gran	UHT	PEL																						1
Harley-2021-531-Fig.9	General	Gran	UHT	PEL																						1
Harley-2021-531-Fig.9	General	Gran	UHT	PEL																						1																					1
Harley-2021-531-Fig.9	General	Gran	UHT	PEL																						1
Harley-2021-531-Fig.9	General	Gran	UHT	PEL																						1																					1
Harley-2021-531-Fig.9	General	Gran	UHT	PEL																						1																					1
Harley-2021-531-Fig.9	General	Gran	UHT	PEL														1								1
Harley-2021-531-Fig.9	General	Gran	UHT	PEL																						1
Harley-2021-531-Fig.9	General	Gran	UHT	PEL																						1
Harley-2021-531-Fig.9	General	Gran	UHT	PEL
Harley-2021-531-Fig.9	General	Gran	UHT	PEL
Harley-2021-531-Fig.9	General	Gran	UHT	PEL																						1																					1
Harley-2021-531-Fig.9	General	Gran	UHT	PEL																						1																					1
Harley-2021-531-Fig.9	General	Gran	UHT	PEL																																											1
Harley-2021-531-Fig.9	General	Gran	UHT	PEL														1								1
Harley-2021-532	Napier Complex, Antarctica	Gran	UHT	PEL
Harley-2021-532	Napier Complex, Antarctica	Gran	UHT	PEL
Harley-2021-533	Napier Complex, Antarctica	Gran	UHT	PEL
Harley-2021-534	Napier Complex, Antarctica	Gran	UHT	PEL
Harley-2021-534	Napier Complex, Antarctica	Gran	UHT	PEL														1																													1
Harley-2021-534	Anapolis-Itaucu Complex, Brazil	Gran	UHT	PEL
Harley-2021-534	Napier Complex, Antarctica	Gran	UHT	PEL
Harley-2021-534	Anapolis-Itaucu Complex, Brazil	Gran	UHT	PEL
Harley-2021-534	Napier Complex, Antarctica	Gran	UHT	PEL
Harley-2021-534	Anapolis-Itaucu Complex, Brazil	Gran	UHT	PEL
Harley-2021-534	Napier Complex, Antarctica	Gran	UHT	PEL																						1
Harley-2021-535	Gage Ridge, Antarctica	Gran	UHT	PEL																						1
Harley-2021-535	Mt. Brusilov, Antarctica	Gran	UHT	PEL																						1
Harley-2021-535	Gage Ridge, Antarctica	Gran	UHT	PEL																						1
Harley-2021-535	Mt. Bartlett, Antiarctica	Gran	UHT	PEL																						1
Harley-2021-536-Fig.15	General	Gran	UHT	PEL
Harley-2021-536-Fig.15	General	Gran	UHT	PEL
Harley-2021-536-Fig.15	General	Gran	UHT	PEL					1
Harley-2021-536-Fig.15	General	Gran	UHT	PEL														1
Harley-2021-536-Fig.15	General	Gran	UHT	PEL														1								1
Harley-2021-536-Fig.15	General	Gran	UHT	PEL					1									1
Harley-2021-536-Fig.15	General	Gran	UHT	PEL					1									1
Harley-2021-536-Fig.15	General	Gran	UHT	PEL					1									1
Harley-2021-536-Fig.15	General	Gran	UHT	PEL														1
Harley-2021-536-Fig.15	General	Gran	UHT	PEL					1									1								1
Harley-2021-536-Fig.15	General	Gran	UHT	PEL														1								1
Harley-2021-536-Fig.15	General	Gran	UHT	PEL					1									1
Harley-2021-536-Fig.15	General	Gran	UHT	PEL
Harley-2021-536-Fig.15	General	Gran	UHT	PEL
Harley-2021-536-Fig.15	General	Gran	UHT	PEL					1
Harley-2021-536-Fig.15	General	Gran	UHT	PEL																						1
Harley-2021-536-Fig.15	General	Gran	UHT	PEL														1								1
Harley-2021-537-Fig.17A	General	Gran	UHT	PEL					1							1																													1		1
Harley-2021-537-Fig.17A	General	Gran	UHT	PEL					1							1																															1
Harley-2021-537-Fig.17A	General	Gran	UHT	PEL												1																															1
Harley-2021-537-Fig.17A	General	Gran	UHT	PEL												1																															1
Harley-2021-537-Fig.17A	General	Gran	UHT	PEL					1							1																													1		1
Harley-2021-537-Fig.17A	General	Gran	UHT	PEL												1																													1		1
Harley-2021-537-Fig.17A	General	Gran	UHT	PEL					1							1																															1
Harley-2021-537-Fig.17A	General	Gran	UHT	PEL												1																															1
Harley-2021-537-Fig.17A	General	Gran	UHT	PEL												1																															1
Harley-2021-537-Fig.17A	General	Gran	UHT	PEL												1																															1
Harley-2021-537-Fig.17A	General	Gran	UHT	PEL					1							1																													1		1
Harley-2021-537-Fig.17A	General	Gran	UHT	PEL					1							1																															1
Harley-2021-537-Fig.17B	General	Gran	UHT	PEL												1		1																			1								1		1
Harley-2021-537-Fig.17B	General	Gran	UHT	PEL												1		1																			1								1
Harley-2021-537-Fig.17B	General	Gran	UHT	PEL												1																					1								1
Harley-2021-537-Fig.17B	General	Gran	UHT	PEL												1																					1
Harley-2021-537-Fig.17B	General	Gran	UHT	PEL					1							1					1																								1		1
Harley-2021-537-Fig.17B	General	Gran	UHT	PEL					1							1																													1		1
Harley-2021-537-Fig.17B	General	Gran	UHT	PEL					1							1																													1		1
Harley-2021-537-Fig.17B	General	Gran	UHT	PEL					1							1																													1		1
Harley-2021-537-Fig.17B	General	Gran	UHT	PEL					1							1																															1
Harley-2021-537-Fig.17B	General	Gran	UHT	PEL					1							1																													1
Harley-2021-537-Fig.17B	General	Gran	UHT	PEL					1							1		1																											1		1
Harley-2021-537-Fig.17B	General	Gran	UHT	PEL					1							1																													1		1
Harley-2021-537-Fig.17B	General	Gran	UHT	PEL												1																													1		1
Harley-2021-537-Fig.17B	General	Gran	UHT	PEL												1																															1
Harley-2021-537-Fig.17B	General	Gran	UHT	PEL												1
Harley-2021-537-Fig.17B	General	Gran	UHT	PEL					1							1		1																											1		1
Harley-2021-537-Fig.17B	General	Gran	UHT	PEL					1							1																													1		1
Harley-2021-537-Fig.17B	General	Gran	UHT	PEL					1							1																													1		1
Harley-2021-537-Fig.17B	General	Gran	UHT	PEL					1							1																													1		1
Harley-2021-537-Fig.17B	General	Gran	UHT	PEL					1							1																															1
Harley-2021-537-Fig.17B	General	Gran	UHT	PEL					1							1																															1
Harley-2021-537-Fig.17B	General	Gran	UHT	PEL					1							1																													1		1
Harley-2021-537-Fig.17B	General	Gran	UHT	PEL					1																																				1		1
Harley-2021-537-Fig.17B	General	Gran	UHT	PEL					1							1																															1
Joplin, 039A	Quartz hornfels, Hartley, NSW	AEHn	CON	SST
Joplin, 039A	Sericite quartzite, Bulla, Victoria	AEHn	CON	SST
Joplin, 040A	Aluminous Hornfels, Bulla, Victoria	AEHn	CON	PEL														1
Joplin, 040B	Andalusite-Cordierite Hornfels, Hartley, NSW	AEHn	CON	PEL						1								1								1
Joplin, 043A	Cord-Qtz-Biotite Hornfels, Bulla, Victoria	HbHn	CON	PEL														1								1
Joplin, 043B	Cord-Qtz-Biotite Hornfels, Tarana, NSW	HbHn	CON	PEL														1								1
Joplin, 043C	Quartz-Biotite Hornfels, Hartley, NSW	HbHn	CON	PEL														1
Joplin, 046A	Cordierite-Plag Hornfels, Hartley, NSW	HbHn	CON	PEL														1								1
Joplin, 046B	Cordierite-Plag Hornfels, Hartley, NSW	HbHn	CON	PEL														1								1
Joplin, 046C	Amphibole-Plag Hornfels, Hartley, NSW	HbHn	CON	PEL														1
Joplin, 048-1	Plag-Hyper-Cord-Spinel Hornfels, Marulan	PyxHn	XEN	CSI																						1
Joplin, 048-1	Amph-Plag-Biotite Hornfels, Hartley, NSW	HbHn	CON	PEL														1																											1
Joplin, 048-2	Hyper-Plag-Diopside Hornfels, Marulan	PyxHn	XEN	CSI														1													1
Joplin, 048-2	Amph-Plag-Biotite Hornfels, Hartley, NSW	HbHn	CON	PEL																																									1
Joplin, 048-3	Hyper-Plag Hornfels, Cowra	PyxHn	XEN	CSI																																													1
Joplin, 048-3	Amph-Diop-Plag Hornfels, Hartley, NSW	HbHn	CON	PEL														1													1														1
Joplin, 048-4	Hyper-Plag Hornfels, Cowra	PyxHn	XEN	CSI																																													1
Joplin, 048-4	Amph-Diop-Plag Hornfels, Hartley, NSW	HbHn	CON	PEL																											1														1
Joplin, 048-5	Amph-Plag Hornfels, Hartley, NSW	HbHn	CON	PEL														1																											1				1
Joplin, 050-1	Plag-Diopside Hornfels, NSW	PyxHn	CON	CSI								1																			1
Joplin, 050-2	Plag-Diopside-Grossular Hornfels, NSW	PyxHn	CON	CSI								1																			1										1
Joplin, 050-3	Grossular-Diopside Hornfels, NSW	PyxHn	CON	CSI																											1										1
Joplin, 050-4	Wollastonite-Grossular-Diopside Hornfels, NSW	PyxHn	CON	CSI																											1										1
Joplin, 050-5	Plag-Wollastonite Hornfels, NSW	San	CON	CSI
Joplin, 051-1	Calcite-Wollastonite	PyxHn	CON	CAR																1
Joplin, 051-2	Quartz-Wollastonite	PyxHn	CON	CSI
Joplin, 051-3	Calcite-Quartz-Talc	AEHn	CON	CSI																1
Joplin, 051-4	Calcite-Quartz-Tremolite	AEHn	CON	CSI																1
Joplin, 052-1	Diopside-Grossular Metastable Hornfels	HbHn	CON	CSI			1													1		1									1			1							1
Joplin, 052-A	Wollstonite Marble	HbHn	CON	CSI																											1										1
Joplin, 052-B	Wollstonite Marble	HbHn	CON	CSI																1																					1
Joplin, 052-C	Wollstonite Marble	HbHn	CON	CSI																1																					1
Joplin, 053-1	Woll-Ortho-Diop-Garnet Hornfels	PyxHn	CON	CSI																											1										1								1
Joplin, 053-2	Woll-Vesuv-Diop-Garnet Hornfels	HbHn	CON	CSI																											1										1
Joplin, 053-3	Gross-Diopside Hornfels	PyxHn	CON	CSI																											1										1
Joplin, 054-1	Dolomitic Marble	HbHn	CON	CAR																1												1
Joplin, 054-2	Periclase Marble	PyxHn	CON	CAR																1
Joplin, 054-3	Brucite Marble	PyxHn	CON	CAR															1	1
Joplin, 054-4	Brucite-Forsterite Marble	PyxHn	CON	CSI															1	1																1
Joplin, 054-5	Forsterite Marble	PyxHn	CON	CSI																1																1
Joplin, 054-6	Forsterite-Spinel Marble	PyxHn	CON	CSI																1																1
Joplin, 054-7	Serpentine Marble	HbHn	CON	CSI																1
Joplin, 055-1	Forsterite-Diopside Marble	PyxHn	CON	CSI																											1
Joplin, 055-2	Diopside Marble	PyxHn	CON	CSI																											1
Joplin, 055-3	Actinolite Marble	HbHn	CON	CSI	1
Joplin, 055-4	Clinohumite-Brucite Marble	PyxHn	CON	CSI																																										1
Joplin, 055-5	Diopside-Quartz Hornfels	PyxHn	CON	PEL																											1
Joplin, 055-6	Diopside-Plagioclase Hornfels	PyxHn	CON	PEL								1																			1
Joplin, 055-7	Diopside-Garnet-Plagioclase Hornfels	PyxHn	CON	PEL								1																			1										1
Joplin, 056-1	Dolomitic Pelites	HbHn	CON	CSI	1																											1
Joplin, 056-10	Quartz-Actinolite Hornfels	HbHn	CON	CSI	1
Joplin, 056-2	Dolomitic Pelites	HbHn	CON	CSI																												1
Joplin, 056-3	Dolomitic Pelites	HbHn	CON	CSI	1																											1		1
Joplin, 056-4	Dolomitic Pelites	HbHn	CON	CSI																												1		1
Joplin, 056-5	Dolomitic Pelites	HbHn	CON	CSI	1																											1
Joplin, 056-6	Dolomitic Pelites	HbHn	CON	CSI																												1
Joplin, 056-7	Dolomitic Pelites	HbHn	CON	CSI	1																											1		1
Joplin, 056-8	Dolomitic Pelites	HbHn	CON	CSI																												1		1
Joplin, 056-9	Diopside Hornfels	PyxHn	CON	CSI																											1
Joplin, 057-2	Biotite-Actinolite Hornfels	HbHn	CON	PEL	1													1
Joplin, 057-3	Antho-Biotite-Plag Hornfels	HbHn	CON	PEL									1					1
Joplin, 057-4	Biotite-Anthophyllite Hornfels	HbHn	CON	PEL									1					1
Joplin, 057-5	Forsterite-Phlogopite-Spinel Hornfels	PyxHn	CON	UMA																																1
Joplin, 058-1	Olivine-Plag-Biotite Hornfels	PyxHn	CON	UMA														1																			1
Joplin, 058-2	Spinel-Diopside-Chlorite Hornfels	PyxHn	CON	UMA																		1									1
Joplin, 058-3	Spinel-Chlorite-Actinolite Hornfels	PyxHn	CON	UMA	1																	1
Joplin, 058-4	Forsterite-Tremolite Hornfels	PyxHn	CON	UMA																																1
Joplin, 058-5	Forsterite-Phlogo-Spinel-Hornblende Hornfels	PyxHn	CON	UMA																																1									1
Joplin, 059-1	Forsterite-Phlogopite-Spinel-Tremolite Hornfels	PyxHn	CON	UMA																																1
Joplin, 059-2	Forsterite-Spinel-Tremolite Hornfels	PyxHn	CON	UMA																																1
Joplin, 059-3	Forsterite-Spinel-Actinolite Hornfels	PyxHn	CON	UMA	1																															1
Joplin, 059-4	Forsterite-Tremolite-Magnetite Hornfels	PyxHn	CON	UMA																																1
Joplin, 059-5	Ultramafic Hornfels	PyxHn	CON	UMA										1		1		1																		1									1
Joplin, 061A	Pyroxene-Plag-Biotite Hornfels	PyxHn	CON	MAF														1
Joplin, 061B	Pyroxene-Plag Hornfels	PyxHn	CON	MAF																											1
Joplin, 061C	Plag-Biotite-Almandine Hornfels	PyxHn	CON	MAF					1									1
Joplin, 062-1	Grossular-Plag-Diopside Hornfels	PyxHn	CON	CSI																											1										1
Joplin, 062-2	Hornblende-Biotite-Plag Hornfels	HbHn	CON	MAF														1																											1
Joplin, 062-3	Hornblende-Biotite-Plag Hornfels	HbHn	CON	MAF														1																											1
Joplin, 062-4	Hornblende-Biotite-Plag Hornfels	HbHn	CON	MAF														1																											1				1
Joplin, 062-5	Hornblende-Biotite-Plag Hornfels	HbHn	CON	MAF														1																											1				1
Joplin, 063-1	Actinolite-Plag-Phillipsite Hornfels	AEHn	CON	MAF	1
Joplin, 063-2	Actinolite-Plag-Phillipsite Hornfels	AEHn	CON	MAF	1
Joplin, 063-3	Actinolite-Plag-Phillipsite Hornfels	AEHn	CON	MAF	1									1				1
Joplin, 063-4	Actinolite-Albite Hornfels	HbHn	CON	MAF	1		1
Joplin, 063-5	Actinolite-Albite Hornfels	HbHn	CON	MAF	1		1																								1
Joplin, 063-6	Hornblende-Plag Hornfels	HbHn	CON	MAF																																									1
Joplin, 063-7	Pyroxene-Garnet-Plag Hornfels	PyxHn	CON	MAF					1							1
Joplin, 063-8	Meta-amygdaloid rocks	AEHn	CON	MAF																1
Joplin, 063-9	Meta-amygdaloid rocks	AEHn	CON	MAF																											1										1
Joplin, 064-1	Hyper-Plag-Cord-Biot Hornfels	PyxHn	CON	MAF														1								1
Joplin, 064-10	Tremolite-Biotite Hornfels	HbHn	CON	UMA														1
Joplin, 064-11	Chlorite-Biotite Hornfels	HbHn	CON	UMA														1				1
Joplin, 064-2	Diop-Hornbl-Phlogo Hornfels	PyxHn	CON	UMA																											1														1
Joplin, 064-3	Diop-Hornbl-Phlogo Hornfels	PyxHn	CON	UMA																											1														1
Joplin, 064-4	Diop-Hornbl-Phlogo Hornfels	PyxHn	CON	UMA																		1									1														1
Joplin, 064-5	Cord-Anthophyllite Hornfels	PyxHn	CON	UMA									1													1
Joplin, 064-6	Biotite-Cordierite Hornfels	PyxHn	CON	UMA														1								1
Joplin, 064-7	Hyperst-Cummingtonite-Plag-Biot Hornfels	PyxHn	CON	MAF
Joplin, 064-8	Diop-Hornbl-Biotite Hornfels	HbHn	CON	UMA														1													1														1
Joplin, 064-9	Diop-Hornbl-Biotite Hornfels	HbHn	CON	UMA														1													1														1
Joplin, 067A	Cordierite-Anthophyllite Hornfels	HbHn	CON	MAF									1									1				1																	1
Joplin, 067B	Cordierite-Anthophyllite Hornfels	HbHn	CON	MAF									1					1								1																	1
Joplin, 067C	Cordierite-Anthophyllite Hornfels	HbHn	CON	MAF					1				1					1								1
Joplin, 068-1	Hornblende-Plag Hornfels	HbHn	CON	INT												1		1																											1
Joplin, 068-2	Hornblende-Plag Hornfels	HbHn	CON	INT												1		1																											1				1
Joplin, 069A	Metaporphyrite, Hartley, NSW	HbHn	CON	INT														1																											1
Joplin, 069B	Metatoscanite, Yalwal, NSW	HbHn	CON	ACI			1											1																															1
Joplin, 069C	Metarhyolite, Yalwal, NSW	HbHn	CON	ACI			1											1
Joplin, 070-1	Metarhyolite, Hartley, NSW	HbHn	CON	ACI			1																																										1
Joplin, 072-1	Metasomatized hornfels	AEHn	MET	PEL																		1												1											1
Joplin, 073A	Metasomatized hornfels	AEHn	MET	PEL																		1												1											1
Joplin, 075A	Tourmalinized Pelite, Tarcutta, NSW	AEHn	MET	PEL
Joplin, 075B	Axinite Rock, Queanbeyan, NSW	AEHn	MET	CSI																1														1
Joplin, 076-1	Quartz-Tourmaline-Topaz Rock, Mt. Bischoff	AEHn	MET	ACI
Joplin, 077A	Topaz Rock, Bellangry, NSW	AEHn	MET	ACI
Joplin, 077B	Greisized psammite, Hartley, NSW	AEHn	MET	ACI
Joplin, 077C	Chondrodite-Serpentine Rock, Mt. Bischoff, Tas	AEHn	MET	CSI																																										1
Joplin, 078A	Andradite Skarn, Yetholme, NSW	HbHn	MET	CSI							1									1
Joplin, 078B	Pyroxene-Andradite Skarn, Yetholme, NSW	PyxHn	MET	CSI							1									1											1
Joplin, 078C	Actinolite Skarn, Ben Bullen, NSW	HbHn	MET	CSI	1															1
Joplin, 081-1	Basalt Xenolith, Ireland	San	XEN	MAF												1																					1
Joplin, 081-2	Basalt Xenolith, Ireland	San	XEN	MAF												1																					1
Joplin, 081-3	Laterite Xenolith, Skipton, Victoria	San	XEN	LAT			1																					1
Joplin, 081-4	Sandstone Xenolith, Apsley, Tasmania	San	XEN	SST																						1
Joplin, 081-5	Sandstone Xenolith, Apsley, Tasmania	San	XEN	SST																						1
Joplin, 082-B	Buchite, Apsley, Tasmania	San	XEN	SST
Joplin, 086A	Mylonitized Gabbro, Giles Range, SA	PyxHn	SHE	MAF												1
Joplin, 086B	Blastomylonite, Mt. Kosciusko, NSW	HbHn	SHE	ACI																		1
Joplin, 086C	Blastomylonite, Cookernup, WA	HbHn	SHE	ACI														1																															1
Joplin, 087A	Blastomylonite, Murrumbucca, NSW	AEHn	SHE	ACI																																													1
Joplin, 087B	Adamellite, Mullewa, WA	AEHn	SHE	INT			1											1				1												1
Joplin, 087C	Hyalomylonite, South Coast, WA	AEHn	SHE	ACI																																													1
Joplin, 088A	Phyllonite, Houghton, SA	HbHn	SHE	PEL														1																															1
Joplin, 088B	Calcareous Phyllonite, Palmer, SA	PyxHn	SHE	CSI																1											1
Joplin, 088C	Chlorite-Albite Phyllonite, Mount Isa, Queensld	AEHn	SHE	MAF			1							1								1
Joplin, 089-1	Antigorite Schist, Wellington, NSW	AEHn	SHE	MAF														1		1														1
Joplin, 089-2	Antigorite-Tremolite Schist, Wellington, NSW	AEHn	SHE	MAF														1		1														1
Joplin, 089-3	Chlorite-Tremolite Schist, Wellington, NSW	AEHn	SHE	MAF														1		1		1												1
Joplin, 098-1	Zeolite Facies	Zeol	REG	PEL																																													1
Joplin, 099-1	Prehnite-Pumpellyite Facies	PP	REG	PEL
Joplin, 099-2	Prehnite-Pumpellyite Facies	PP	REG	PEL
Joplin, 127-1	Tremolite-Chlorite Schist, Cairns	Gree	REG	UMA																		1
Joplin, 127-2	Talc-Antigorite-Carbonate Rock, Cairns	Gree	REG	UMA																1
Joplin, 128A	Tremolite-Chlorite Schist, Cooma	Gree	REG	UMA																		1
Joplin, 128B	Hyper-Trem-Cumm Rock, Wantabadgery, NSW	Gree	REG	UMA																									1
Joplin, 129-1	Trem-Antho-Chlorite Rock, Cooma	Gree	REG	UMA									1									1
Joplin, 130-1	Metabassite, Wantabadgery	Amph	REG	MAF	1		1									1				1		1												1											1
Joplin, 131-1	Actinolite-Albite Schist	Amph	REG	MAF	1		1																											1
Joplin, 131-2	Albite-Epidote-Chlorite Schist	Amph	REG	MAF			1															1												1
Joplin, 131-3	Amphibolite	Amph	REG	MAF			1															1
Joplin, 131-4	Amphibolite	Amph	REG	MAF																																									1
Joplin, 131-5	Hornblende-Plagioclase Amphibolite	Amph	REG	MAF																																									1
Joplin, 132A1	Albite-Epidote-Chlorite Rock, NSW	Gree	REG	MAF			1															1																							1
Joplin, 132A2	Albite-Clinozoisite-Chlorite Rock, NSW	Gree	REG	MAF			1															1												1
Joplin, 132B	Amphibolite, Adelong, NSW	Amph	REG	MAF			1																																						1
Joplin, 133A	Granulite, Cooma, NSW	Gran	REG	MAF																											1														1
Joplin, 133B	Granulite, Cooma, NSW	Gran	REG	MAF																											1														1
Joplin, 133C	Hornblende-Bytownite Rock, Cambrai, SA	Amph	REG	MAF								1																																	1
Joplin, 134-1	Metadolerite, Kanmantoo	Amph	REG	INT														1																1											1
Joplin, 134-2	Metadolerite, Kanmantoo	Amph	REG	INT														1																1											1
Joplin, 134-3	Metadolerite, Kanmantoo	Amph	REG	INT														1																											1
Joplin, 134-4	Metadolerite, Kanmantoo	Amph	REG	INT														1																											1
Joplin, 135-1	Metadolerite, Cambrai	Amph	REG	INT										1																															1
Joplin, 135-2	Metadolerite, Cambrai	Amph	REG	INT																1		1																							1
Joplin, 135-3	Metasomatized Metadolerite, Cambrai	Amph	REG	INT																1		1																							1
Joplin, 135-4	Metasomatized Metadolerite, Cambrai	Amph	REG	INT														1																											1
Joplin, 138A	Polymetamorphosed Amphibolite, Cooma, NSW	Amph	CON	PEL										1																				1											1
Joplin, 138B	Tourmalinized Schist, Cambrai, SA	Amph	MET	PEL									1									1				1
Joplin, 138C	Blastomylonite, Bredbo, NSW	Amph	SHE	SST
Joplin, 153A	Quartz-Musc-Chlorite Schist, Tasmania	Gree	REG	PEL																		1
Joplin, 153B	Chloritoid-Quartz-Alb-Musc Schist, WA	Gree	REG	PEL			1																1
Joplin, 153C	Alb-Almandine-Chor-Musc Schist, Tasmania	Gree	REG	PEL			1		1													1
Joplin, 154A	Psammopelite, Mt. Ramsay, WA	Gree	REG	PEL
Joplin, 154B	Mica Schist, Mt. Ramsay, WA	Gree	REG	PEL
Joplin, 155-1	Mica Schist, Point Ann, WA	Gree	REG	PEL														1
Joplin, 155-2	Mica Schist, Point Ann, WA	Gree	REG	PEL			1											1																1
Joplin, 155-3	Mica Schist, Mount Mullins, Tasmania	Gree	REG	PEL			1											1
Joplin, 155-4	Garnet-Mica Schist, Tasmania	Amph	REG	PEL			1		1													1
Joplin, 156-1	Quartz-Almandine-Chlorite Schist, Mt. Mary	Amph	REG	PEL					1													1
Joplin, 156-2	Quartz-Almandine-Mu-Bio Schist, Russell Range	Amph	REG	PEL					1									1
Joplin, 156-3	Quartz-Almandine-Ab-Bio Schist, Tasmania	Amph	REG	PEL			1		1									1
Joplin, 157-1	Staurolite-Almandine-Biotite Schist, Ballara	Amph	REG	PEL					1									1
Joplin, 157-2	Staurolite-Almandine-Biotite Schist, Cattle Creek	Amph	REG	PEL					1									1
Joplin, 157-3	Staurolite-Mica Schist, Georgetown-Clark River	Amph	REG	PEL					1									1
Joplin, 157-4	Staurolite-Mica Schist, East Kimberley	Amph	REG	PEL														1				1
Joplin, 158-1	Staurolite-Kyanite Schist, Chittering Valley	Amph	REG	PEL														1
Joplin, 158A	Garnet-Biotite Schist, Tasmania	Amph	REG	PEL					1									1				1
Joplin, 158B	Garnet-Biotite Schist, Queensland	Amph	REG	PEL					1									1
Joplin, 158C	Staurolite-Kyanite Schist, East Mount Barren	Amph	REG	PEL														1
Joplin, 159-1	Kyanite-Biotite Schist, Chittering Lake	Amph	REG	PEL														1
Joplin, 159-2	Sillimanite-Muscovite Schist, Denmark, WA	Amph	REG	PEL
Joplin, 159-3	Kyanite-Quartz-Muscovite Schist, Mt. Barren	Amph	REG	PEL					1													1
Joplin, 159-4	Kyanite-Biotite Schist, Chittering Lake	Amph	REG	PEL					1	1																														1
Joplin, 160-1	Sillimanite Schist, WA	Amph	REG	PEL														1
Joplin, 160A	Andalusite-Garnet Schist, Queensland	Amph	REG	PEL					1	1								1
Joplin, 160B	Sillimanite Mica Schist, WA	Amph	REG	PEL
Joplin, 160C	Sillimanite Mica Schist, NSW	Amph	REG	PEL														1																															1
Joplin, 162-1	Sillimanite Schist, WA	Amph	REG	PEL					1									1																															1
Joplin, 162-2	Garnet Granulite, WA	Gran	REG	PEL					1									1																						1									1
Joplin, 163-1	Garnet Granulite, WA	Gran	REG	PEL					1									1																															1
Joplin, 163-2	Cordierite Granulite, WA	Gran	REG	PEL					1																	1																							1
Joplin, 163-3	Sillimanite-Cordierite Granulite, WA	Gran	REG	PEL					1																	1																							1
Joplin, 163-4	Sill-Garnet-Cord Granulite, Broken Hill	Gran	REG	PEL					1									1								1																							1
Joplin, 163-5	Sill-Graphite-Cord Granulite, WA	Gran	REG	PEL					1																															1									1
Joplin, 164-1	Sill-Garnet-Orthclase Gneiss, Eyres, SA	Gran	REG	PEL					1									1																															1
Joplin, 164A	Garnet-Cordierite Gneiss, Albany, WA	Gran	REG	PEL					1									1								1																							1
Joplin, 164B	Garnet-Cord-Sill Gneiss, Broken Hill, NSW	Gran	REG	PEL					1									1								1																							1
Joplin, 164C	Garnet-Graphite Gneiss, Eyres, SA	Gran	REG	PEL					1					1				1																						1									1
Joplin, 167A	Metaconglomerate, Mt. Isa, Queensland	Gree	REG	SST																		1
Joplin, 167B	Metaconglomerate, Kalgoorlie, WA	Gree	REG	SST	1																																								1
Joplin, 167C	Metasiltstone, Kalgoorlie, WA	Gree	REG	SST														1																						1
Joplin, 168-1	Chloritoid Metaconglomerate, Tasmania	Gree	REG	SST																		1	1
Joplin, 168-2	Quartz-Biotite-Feldspar Schist, Kalgoorlie, WA	Gree	REG	SST			1											1
Joplin, 168-3	Garnet-Biot-Musc Quartzite, Tasmania	Amph	REG	PEL					1									1
Joplin, 168-4	Quartz-Staurolite Schist, WA	Amph	REG	SST
Joplin, 168-5	Quartz-Kyanite Schist, WA	Amph	REG	SST																		1
Joplin, 169A	Quartz-Biotite Schist, Toodya, WA	Amph	REG	PEL														1
Joplin, 169B	Qtz-Feld-Graph-CC Rock, Eyres, WA	Gran	REG	PEL																1																				1									1
Joplin, 169C	Almandine-Quartz-Feld Granulite, Broken Hill	Gran	REG	PEL					1									1																															1
Joplin, 171-1	Qtz-Feld-Calcite-Graphite Rock, Eyres, WA	Gran	REG	CSI																1																				1									1
Joplin, 172-1	Metadolomite, Kimberley, WA	Amph	REG	CSI																		1										1
Joplin, 172-2	Metadolomite, Kimberley, WA	Amph	REG	CSI																		1										1
Joplin, 172A	Dolomite Marble, Tasmania	Amph	REG	CAR																1												1
Joplin, 172B	Forsterite Marble, Eyres, SA	Amph	REG	CAR																1												1				1									1
Joplin, 173-1	Tremolite Marble, Middeback Range, SA	Amph	REG	CSI																1																													1
Joplin, 173-2	Pyroxene Marble, Middeback Range, SA	Amph	REG	CSI																1											1																		1
Joplin, 173-3	Skarns, Kimberley, WA	Amph	REG	CSI																											1			1							1
Joplin, 174-1	Amphibolite Skarn, Broken Hill	Amph	REG	CSI								1																																	1
Joplin, 174-2	Amphibolite Skarn, Broken Hill	Amph	REG	CSI								1								1											1														1
Joplin, 175-1	Forsterite Marble, Eyres, SA	Amph	REG	CAR																1												1				1
Joplin, 175-2	Skarns, Sleaford bay	Amph	REG	CSI								1						1													1									1									1
Joplin, 179-1	Magnetite-Grunnerite Quartzite, Bullfinch	Gran	REG	BFE
Joplin, 179-2	Magnetite-Grun-Hyper Quartzite, Bullfinch	Gran	REG	BFE
Joplin, 179-3	Magnetite-Hedenbergite Quartzite, Bullfinch	Gran	REG	BFE																																						1
Joplin, 179A	Meta-BIF, Hamersley Range, WA	Gran	REG	BFE
Joplin, 179B	Meta-BIF, Mount Palmer, WA	Gran	REG	BFE
Joplin, 179C	Meta-BIF, Toodyay, WA	Gran	REG	BFE
Joplin, 180A	BIF Granulite, Dangin, WA	Gran	REG	BFE
Joplin, 180B	BIF Granulite, Dangin, WA	Gran	REG	BFE					1
Joplin, 180C	BIF Granulite, Dangin, WA	Gran	REG	BFE					1
Joplin, 181-1	BIF Granulite, Pilbara, WA	Gran	REG	BFE																															1
Joplin, 182A	BIF Amphibolite, Hamersley, WA	Amph	REG	BFE																															1
Joplin, 182B	BIF Amphibolite, Pilbara, WA	Amph	REG	BFE																															1
Joplin, 182C	Garnet Sandstone, Broken Hill, NSW	Amph	REG	BFE					1
Joplin, 187A	Ultramafic Schist, WA	Amph	REG	UMA
Joplin, 187B	Ultramafic Schist, WA	Amph	REG	UMA
Joplin, 187C	Ultramafic Schist, WA	Amph	REG	UMA														1
Joplin, 189A	Ultramafic Granulites, Dungin, WA	Gran	REG	UMA																																	1								1
Joplin, 189B	Ultramafic Granulites, Dungin, WA	Gran	REG	UMA																																									1
Joplin, 190-1	Hornblende-Cpx-Granulite, WA	Gran	REG	UMA												1																													1
Joplin, 191A	Bronzte-hornblende Granulite, Dangin, WA	Gran	REG	UMA																																									1
Joplin, 191B	Hypersthene-Andesine Granulite, Dangin, WA	Gran	REG	UMA																																													1
Joplin, 194-1	Diaspore-Cord-Orthopyx Rock, Toodyay, WA	Gran	REG	UMA																						1
Joplin, 194-2	Garnet-Biotite Rock, Toodyay, WA	Gran	REG	UMA					1									1								1
Joplin, 194A	Orthopyroxene Xenolith, Toodyay, WA	Gran	REG	UMA									1																								1
Joplin, 194B	Anthophyllite-Cordierite Rock, Toodyay, WA	Gran	REG	UMA			1						1													1
Joplin, 194C	Garnet-Cordierite Gneiss, Dangin, WA	Gran	REG	UMA					1					1				1								1
Joplin, 202A	Actinolite Schist, Kalgoorlie, WA	Amph	REG	MAF	1		1													1		1
Joplin, 202B	Actinolite Schist, Kalgoorlie, WA	Amph	REG	MAF	1		1							1								1												1
Joplin, 202C	Hornblende Schist, Tasmania	Amph	REG	MAF			1		1																									1											1
Joplin, 206A	Amphibolite, Fourth River Valley	Amph	REG	MAF			1		1																																				1
Joplin, 206B	Amphibolite, Clonclurry	Amph	REG	MAF			1																											1											1
Joplin, 208A	Amphibolite, Broken Hill	Amph	REG	MAF								1																																	1
Joplin, 208B	Amphibolite, Broken Hill	Amph	REG	MAF																																									1
Joplin, 208C	Amphibolite, Clonclurry	Amph	REG	MAF																																									1
Joplin, 210A	Amphibolite, Toodyay, WA	Amph	REG	MAF																																									1
Joplin, 210B	Amphibolite, Eyres, WA	Amph	REG	MAF														1																											1				1
Joplin, 210C	Amphibolite, Fourth River Valley, Tasmania	Amph	REG	MAF					1																																				1
Joplin, 215A	Pyroxene-Plagioclase Granulite, Broken Hill	Gran	REG	MAF												1																													1		1
Joplin, 215A	Pyroxene-Plagioclase Granulite, Broken Hill	Gran	REG	MAF												1																													1		1
Joplin, 215B	Pyroxene-Plagioclase Granulite, Eyres, SA	Gran	REG	MAF										1		1																															1
Joplin, 215B	Pyroxene-Plagioclase Granulite, Eyres, SA	Gran	REG	MAF										1		1																															1
Joplin, 217A	Hbl-Pyx-Plag Granulite, Quairading, WA	Gran	REG	MAF												1																													1
Joplin, 217B	Hbl-Pyx-Plag Granulite, Quairading, WA	Gran	REG	MAF												1																													1
Joplin, 217C	Hbl-Pyx-Plag Granulite, Albany, WA	Gran	REG	MAF										1		1																													1
Joplin, 218-1	Scapolite Granulite, various	Gran	REG	CSI								1																			1										1
Joplin, 218-2	Scapolite Granulite, various	Gran	REG	CSI								1																			1
Joplin, 219-1	Eclogite, Various	Eclo	HPM	UMA																																												1
Joplin, 219-2	Eclogite, Various	Eclo	HPM	UMA
Joplin, 219-3	Eclogite, Various	Eclo	HPM	UMA					1																																							1
Joplin, 219-4	Eclogite, Various	Eclo	HPM	UMA					1
Joplin, 223A	Metadacite, Cloncurry, NW	Amph	REG	INT														1		1		1																											1
Joplin, 223B	Metarhyolite, Kalgooorie, WA	Amph	REG	ACI																																													1
Joplin, 223C	Metaporphyry, Norseman, WA	Amph	REG	ACI			1											1																1															1
Joplin, 225A	Metagabbro, Broken Hill, NSW	HbHn	CON	MAF												1																													1
Joplin, 225B	Metadolerite, Eryes, SA	HbHn	CON	MAF												1		1																											1
Joplin, 225C	Metadolerite, Broken Hill, NSW	HbHn	CON	MAF												1																					1								1
Joplin, 233-1	Charnockite, Dangin, WA	Gran	REG	ACI														1								1																							1
Joplin, 233-2	Charnockite, Spinifex Hill, SA	Gran	REG	ACI										1		1																													1				1
Joplin, 233-3	Charnockite, Ernabella, SA	Gran	REG	INT										1		1																													1				1
Joplin, 238A	Polymetamorphosed Pelites, Mt. Painter, SA	Amph	REG	PEL																							1																						1
Joplin, 238B	Polymetamorphosed Pelites, Kalgoorlie, WA	Amph	REG	PEL						1								1
Joplin, 238C	Polymetamorphosed Pelites, Bimbourie, SA	Amph	REG	PEL						1
Joplin, 242A	Potash Metasomatism, Broken Hill, NSW	Amph	REG	PEL						1								1
Joplin, 242B	Potash Metasomatism, Dangin, WA	Amph	REG	PEL																																									1
Joplin, 244A	Scapolite-Biotite Schist, Queensland	Amph	REG	CSI														1		1																											1
Joplin, 244B	Scapolite-Biotite Schist, Queensland	Amph	REG	CSI														1
Joplin, 246A	Scapolite Rock, Queensland	Amph	REG	CSI																											1														1
Joplin, 246B	Scapolite Rock, Port Charles, WA	Amph	REG	CSI																																					1
Joplin, 246C	Scapolite Rock, Yankaninna, SA	Amph	REG	CSI			1											1		1																				1
Joplin, 247A	Alumina Metasomatism, Williamstown, SA	Amph	REG	PEL
Joplin, 247B	Alumina Metasomatism, Williamstown, SA	Amph	REG	PEL																							1
Joplin, 247C	Alumina Metasomatism, Broken Hill, NSW	Amph	REG	PEL														1
Joplin, 249A	Carbonated Meta-Igneous Rock, Kalgoorlie, WA	Amph	REG	CSI																		1										1															1		1
Joplin, 249B	Carbonated Meta-Igneous Rock, Queensland	Amph	REG	INT
Joplin, 251C	Garnet Gneiss, Eyres, SA	Amph	REG	PEL					1									1
Joplin, 252A	Metasomatized Schist, Broken Hill, NSW	Amph	REG	PEL					1
Joplin, 252B	Almandine Schist, Tasmania	Amph	REG	PEL					1													1
Joplin, 252C	Albite-Almandine Schist, Frenchman's Cap	Amph	REG	PEL			1		1									1
Joplin, 253A	Chloritoid Rock, Kalgoorlie, WA	Amph	REG	PEL																			1																								1
Joplin, 253B	Chloritoid Schist, Eyres, SA	Amph	REG	PEL																			1
Joplin, 253C	Chloritoid Schist, Eyres, SA	Amph	REG	PEL														1					1																										1
Joplin, 254A	Chloritoid Rock, Broken Hill, NSW	Amph	REG	PEL																			1
Joplin, 254B	Staurolite Rock, Broken Hill, NSW	Amph	REG	PEL
Joplin, Table IX	Feldspar Schist Zone, Dalradian	HbHn	REG	PEL			1		1									1
Joplin, Table IX	Andalusite Zone, Kanmantoo	HbHn	REG	PEL			1		1	1								1
Joplin, Table IX	Andalusite Zone, Dalradan	HbHn	REG	PEL			1		1									1
Joplin, Table IX	Andalusite Zone, Buchan	HbHn	REG	PEL					1	1								1
Joplin, Table IX	Sillimanite Zone, Dalradian	HbHn	REG	PEL					1									1								1																							1
Joplin, Table IX	Sillimanite Zone, Cooma, EA	HbHn	REG	PEL					1	1								1								1																							1
Joplin, Table IX	Sillimanite Zone, Buchan	HbHn	REG	PEL					1	1								1								1																							1
Joplin, Table IX	Sillimanite Zone, Kanmantoo	HbHn	REG	PEL					1	1								1								1																							1
Joplin, Table IX	Sillimanite Zone, Dalradian	HbHn	REG	PEL					1									1																															1
Joplin, Table IX	Sillimanite Zone, Kanmantoo	HbHn	REG	PEL					1	1								1																															1
Joplin, Table IX	Sillimanite Zone, Cairns	HbHn	REG	PEL			1			1								1								1																							1
Joplin, Table IX	Biotite Zone, Cairns	Gree	REG	PEL														1				1
Joplin, Table IX	Feldspar Schist Zone, Cooma, EA	HbHn	REG	PEL					1	1								1																															1
Joplin, Table IX	Chlorite Zone, Dalradian	Gree	REG	PEL			1															1																		1
Joplin, Table IX	Chlorite Zone, Cooma, EA	Gree	REG	PEL																		1																		1
Joplin, Table IX	Andalusite Zone, Wongwibinda	HbHn	REG	PEL			1											1																						1
Joplin, Table IX	Andalusite Zone, Cooma, EA	HbHn	REG	PEL			1			1								1				1				1
Joplin, Table IX	Almandine Zone, Dalradian	AEHn	REG	PEL			1		1									1				1	1
Joplin, Table IX	Biotite Zone, Dalradian	Gree	REG	PEL			1		1									1				1	1
Joplin, Table IX	Biotite Zone, Buchan	Gree	REG	PEL			1		1									1				1
Joplin, Table IX	Biotite Zone, Kanmantoo	Gree	REG	PEL			1		1									1				1
Joplin, Table IX	Biotite Zone, Cooma, EA	Gree	REG	PEL					1									1
Joplin, Table IX	Biotite Zone, Cooma, EA	Gree	REG	PEL														1
Joplin, Table IX	Sillimanite Zone, Abukuma	HbHn	REG	PEL						1								1								1																							1
Joplin, Table IX	Sillimanite Zone, Cairns	HbHn	REG	PEL			1			1								1								1																							1
Joplin, Table IX	Sillimanite Zone, Abukuma	HbHn	REG	PEL			1		1	1								1								1																							1
Joplin, Table IX	Sillimanite Zone, Wongbinda	HbHn	REG	PEL			1		1									1								1																							1
Joplin, Table IX	Andalusite Zone, Abukuma	HbHn	REG	PEL						1								1								1
Joplin, Table IX	Biotite Zone, Abukuma	Gree	REG	PEL					1									1				1																		1
Joplin, Table IX	Biotite Zone, Abukuma	Gree	REG	PEL														1				1																		1
Leger-1993-40-25	Waits River Fm, Vermont	Gree	REG	CSI														1		1		1																		1
Leger-1993-41-28	Waits River Fm, Vermont	Gree	REG	CSI														1		1		1																		1
Leger-1993-41-30A	Waits River Fm, Vermont	Gree	REG	CSI																1		1											1							1
Leger-1993-41-31	Waits River Fm, Vermont	Amph	REG	CSI														1		1		1																		1					1
Leger-1993-48-27	Waits River Fm, Vermont	Gree	REG	CSI														1		1		1											1							1
Leger-1993-48-32	Waits River Fm, Vermont	Gree	REG	CSI																1		1											1							1
Leger-1993-48-40	Waits River Fm, Vermont	Gree	REG	CSI																1													1							1
Leger-1993-48-9	Waits River Fm, Vermont	Gree	REG	CSI																1													1							1
Leger-1993-49-12	Waits River Fm, Vermont	Amph	REG	CSI																1											1									1					1				1
Leger-1993-49-19B	Waits River Fm, Vermont	Amph	REG	CSI														1		1		1																		1					1
Leger-1993-49-22	Waits River Fm, Vermont	Amph	REG	CSI																1											1									1					1				1
Leger-1993-49-5	Waits River Fm, Vermont	Amph	REG	CSI														1		1		1																		1					1
Leger-1993-56-13	Waits River Fm, Vermont	Gree	REG	CSI																1													1							1
Leger-1993-56-14A	Waits River Fm, Vermont	Gree	REG	CSI																1													1							1
Leger-1993-56-17B	Waits River Fm, Vermont	Amph	REG	CSI														1		1		1																		1					1
Leger-1993-56-22	Waits River Fm, Vermont	Amph	REG	CSI																1											1									1					1				1
Leger-1993-56-34	Waits River Fm, Vermont	Gree	REG	CSI																1													1							1
Leger-1993-56-6A	Waits River Fm, Vermont	Amph	REG	CSI																1											1									1					1				1
Leger-1993-57-19	Waits River Fm, Vermont	Amph	REG	CSI														1		1											1									1					1
Leger-1993-57-1B	Waits River Fm, Vermont	Gree	REG	CSI																1													1							1
Leger-1993-57-1H	Waits River Fm, Vermont	Gree	REG	CSI																1													1							1
Leger-1993-57-20	Waits River Fm, Vermont	Gree	REG	CSI														1		1													1							1
Leger-1993-57-26	Waits River Fm, Vermont	Gree	REG	CSI																1													1							1
Leger-1993-57-30	Waits River Fm, Vermont	Amph	REG	CSI														1		1																				1					1
Leger-1993-57-3C	Waits River Fm, Vermont	Gree	REG	CSI														1		1													1							1
P&A, 416,B	Chl+Musc+Qts --> Gar+Bio, Wepawaug Schist	Amph	REG	PEL					1									1				1
P&A, 416,D	Ol+Aug --> Serp	Gree	OPH	UMA												1																					1
P&A, 417 text	Musc+Qtz <--> Orth+Sill	Amph	REG	PEL																																													1
P&A, 418A	Slate, Waterville Fm, Maine	Gree	REG	PEL																		1
P&A, 418B	Schist, Waterville Fm, Maine	Amph	REG	PEL					1									1
P&A, 418C	Hornfels, Skiddaw Granite, English Lake Dist,	AEHn	CON	PEL						1
P&A, 418D	Chloritoid schist, Leeds, Quebec	Gree	REG	PEL																			1
P&A, 418E	Staurolite Schist, Gassetts Schist, Vermont	Amph	REG	PEL
P&A, 418F	Cordierite-Mica Schist, Waterville Fm, Maine	Amph	REG	PEL																						1
P&A, 418G	Kyanite Schist, Gassetts Schist, Vermont	Amph	REG	PEL
P&A, 418H	Garnetiferous Mica Schist, Bronson Hill, MA	Amph	REG	PEL					1
P&A, 418I	Sillimanite Schist, Aberdeenshire, Scotland	Amph	REG	PEL																																													1
P&A, 421A	Metabasalt, Zeolite facies, Vancouver Is., BC	Zeol	REG	MAF			1															1
P&A, 421B	Metabasalt, Greenschist facies, CT	Gree	REG	MAF	1		1															1												1
P&A, 421C	Metabasalt, Amphibolite facies, Mitchell Co, NC	Amph	REG	MAF																																									1
P&A, 421D	Metabasalt, Granulite facies, Adirondacks, NY	Gran	REG	MAF												1
P&A, 421E	Metabasalt, Blueschist facies, Tinos Is., Greece	Blue	HPM	MAF					1																									1					1
P&A, 421F	Metabasalt, Eclogite facies, Tinos Is, Greece	Eclo	HPM	MAF		1																												1
P&A, 422 text	Metabasalt, Eclogite facies	Eclo	HPM	MAF																														1
P&A, 422 text	Metabasalt, Prehnite-Pumpellyite facies	PP	REG	MAF	1		1															1
P&A, 423 Table	Pelitic Rock; Amphibolite Facies, Kyanite zone	Amph	REG	PEL					1									1
P&A, 423 Table	Pelitic Rock; Amphibolite Facies, Staurolite zone	Amph	REG	PEL					1									1
P&A, 423 Table	Pelitic Rock; Amphibolite Facies, Sillimanite zone	Amph	REG	PEL					1									1
P&A, 423 Table	Pelitic Rock; Greenschist Facies, garnet zone-II	Gree	REG	PEL					1									1					1
P&A, 423 Table	Pelitic Rock; Greenschist Facies, garnet zone-I	Gree	REG	PEL					1
P&A, 423 Table	Carbonate Rock; Blueschist Facies, higher P	Blue	HPM	CAR			1								1																	1		1					1
P&A, 423 Table	Carbonate Rock; Eclogite Facies	Eclo	HPM	CAR											1																	1		1
P&A, 423 Table	Pelitic Rock; Blueschist Facies, lower P-II	Blue	HPM	PEL			1		1													1																	1
P&A, 423 Table	Pelitic Rock; Blueschist Facies, higher P	Blue	HPM	PEL		1			1													1																	1
P&A, 423 Table	Carbonate Rock; Blueschist Facies, lower P	Blue	HPM	CAR			1								1							1										1		1					1
P&A, 423 Table	Pelitic Rock; Blueschist Facies, lower P-I	Blue	HPM	PEL			1		1													1												1					1
P&A, 423 Table	Pelitic Rock; Prehnite-Pumpellyite Facies	PP	REG	PEL			1													1		1										1
P&A, 423 Table	Carbonate Rock; Zeolite Facies	Zeol	REG	CAR			1													1		1										1
P&A, 423 Table	Pelitic Rock; Zeolite Facies	Zeol	REG	PEL			1													1		1										1
P&A, 423 Table	Carbonate Rock; Greenschist Facies, lower T	Gree	REG	CAR			1													1												1
P&A, 423 Table	Pelitic Rock; Greenschist Facies, biotite zone	Gree	REG	PEL			1											1				1
P&A, 423 Table	Pelitic Rock; Greenschist Facies, chlorite zone	Gree	REG	PEL			1															1
P&A, 423 Table	Carbonate Rock; UHP metamorphism	UHP	HPM	CAR											1										1					1		1		1
P&A, 423 Table	Carbonate Rock; Granulite Facies	Gran	REG	CAR																1											1	1				1													1
P&A, 423 Table	Ultramafic; Amphibolite facies	Amph	REG	UMA									1																							1
P&A, 423 Table	Ultramafic; Greenschist facies	Gree	REG	UMA															1																	1
P&A, 423 Table	Ultramafic; Eclogite facies	Eclo	HPM	UMA												1																				1
P&A, 423 Table	Ultramafic; Granulite facies	Gran	REG	UMA												1																				1
P&A, 423 Table	Carbonate Rock; Amphibolite Facies	Amph	REG	CAR														1		1											1	1													1				1
P&A, 423 Table	Pelitic Rock; Granulite Facies, UHP	Gran	REG	PEL					1									1								1																							1
P&A, 423 Table	Pelitic Rock; Granulite Facies	Gran	REG	PEL					1									1								1																							1
P&A, 423 Table	Mafic Rock; Prehnite-Pumpellyite Facies	PP	REG	MAF			1													1		1										1
P&A, 423 Table	Mafic Rock; Zeolite Facies	Zeol	REG	MAF			1													1		1										1
P&A, 423 Table	Ultramafic; Zeolite facies	Zeol	REG	UMA															1													1
P&A, 423 Table	Mafic Rock; Eclogite Facies	Eclo	HPM	MAF
P&A, 423 Table	Pelitic Rock; Eclogite Facies	Eclo	HPM	PEL
P&A, 423 Table	Pelitic Rock; Eclogite Facies, UHP	Eclo	HPM	PEL																					1					1
P&A, 423 Table	Mafic Rock; Eclogite Facies, UHP	Eclo	HPM	MAF																					1
P&A, 423 Table	Mafic Rock; Granulite Facies	Gran	REG	MAF					1							1
P&A, 423 Table	Carbonate Rock; Greenschist Facies, higher T	Gree	REG	CAR														1		1												1
P&A, 423 Table	Mafic Rock; Blueschist Facies, lower P-II	Blue	HPM	MAF			1		1													1																	1
P&A, 423 Table	Mafic Rock; Blueschist Facies, higher P	Blue	HPM	MAF		1			1													1																	1
P&A, 423 Table	Mafic Rock; Blueschist Facies, lower P-I	Blue	HPM	MAF			1		1													1												1					1
P&A, 423 Table	Mafic Rock; Amphibolite Facies	Amph	REG	MAF	1		1															1												1
P&A, 423 Table	Carbonate Rock; Prehnite-Pumpellyite Facies	PP	REG	CAR			1													1												1
P&A, 429, Fig 17.1	Calc slate	Gree	REG	CSI																1																				1
P&A, 430, Fig.17.3	Mica schist	Amph	REG	PEL														1				1
P&A, 430, Fig.17.4	Metasandstone	Gree	REG	SST																		1
P&A, 431, Fig.17.5	Foraminifera limestone	Gree	REG	CSI																1
P&A, 432, Fig.17.7	Quartzite	Amph	REG	PEL
P&A, 448, Fig.18.1	Model metamorphics-Shale-II	Amph	REG	PEL
P&A, 448, Fig.18.1	Model metamorphics-Shale-III	Amph	REG	PEL																																													1
P&A, 448, Fig.18.1	Model metamorphics-Sandstone-I	Amph	REG	PEL																																													1
P&A, 448, Fig.18.1	Model metamorphics-Shale-I	Amph	REG	PEL						1
P&A, 448, Fig.18.1	Model metamorphics-Sandstone-IV	Amph	REG	PEL																																													1
P&A, 541A	Metacarbonate: Ankerite-Albite Zone	Gree	REG	CSI			1													1													1
Penniston-2006-16cm-a	East-Central Vermont	Gree	REG	CSI										1				1		1		1											1
Penniston-2006-16cm-c	East-Central Vermont	Gree	REG	CSI				1						1				1		1		1											1
Penniston-2006-16cm-g	East-Central Vermont	Gree	REG	CSI				1						1				1		1		1											1
Penniston-2006-16cm-i	East-Central Vermont	Gree	REG	CSI				1						1				1		1		1											1
Penniston-2006-35m-13a	East-Central Vermont	Gree	REG	CSI				1						1				1		1		1											1
Penniston-2006-35m-17	East-Central Vermont	Gree	REG	CSI				1						1				1		1		1											1
Penniston-2006-35m-6	East-Central Vermont	Gree	REG	CSI				1						1				1		1		1											1
Penniston-2006-35m-7	East-Central Vermont	Gree	REG	CSI										1						1		1											1
Penniston-2006-5m-12	East-Central Vermont	Gree	REG	CSI				1						1				1		1		1											1
Penniston-2006-5m-14	East-Central Vermont	Gree	REG	CSI										1				1		1		1											1
Penniston-2006-5m-6	East-Central Vermont	Gree	REG	CSI				1						1				1		1		1											1
Penniston-2006-5m-8	East-Central Vermont	Gree	REG	CSI										1				1		1		1											1
Penniston-2006-F-A9	South-Central Maine	Gree	REG	CSI										1				1		1		1											1
Penniston-2006-F-B7	South-Central Maine	Gree	REG	CSI										1				1		1		1											1
Penniston-2006-T-52	South-Central Maine	Gree	REG	CSI										1						1													1
Penniston-2006-T-57	South-Central Maine	Gree	REG	CSI				1						1				1		1		1											1
Penniston-2006-T-66	South-Central Maine	Gree	REG	CSI										1				1		1		1											1
Penniston-2006-T-78	South-Central Maine	Gree	REG	CSI				1						1				1		1		1											1
Penniston-2006-TP-29b	South-Central Maine	Gree	REG	CSI										1				1		1		1											1
Penniston-2006-TP-29c	South-Central Maine	Gree	REG	CSI										1				1		1		1											1
Penniston-2006-TP-6a	South-Central Maine	Gree	REG	CSI				1						1						1		1											1
Penniston-2006-TP-6b	South-Central Maine	Gree	REG	CSI				1						1				1		1		1											1
Penniston-2006-TP-89b	South-Central Maine	Gree	REG	CSI										1				1		1		1											1
Penniston-2006-TP-89c	South-Central Maine	Gree	REG	CSI										1				1		1		1											1
R&S, 038	Sanidinite facies, various	San	CON	CSI																1
R&S, 038	Sanidinite facies, various	San	CON	CSI
R&S, 038	Sanidinite facies, various	San	CON	CSI
R&S, 038	Sanidinite facies, various	SAN	CON	CAR																1
R&S, 038	Sanidinite facies, various	San	CON	CSI
R&S, 038	Sanidinite facies, various	San	CON	CSI
R&S, 038	Sanidinite facies, various	SAN	CON	CAR																1
R&S, 038	Sanidinite facies, various	SAN	CON	CAR																1
R&S, 038	Sanidinite facies, various	San	CON	CSI
R&S, 038	Sanidinite facies, various	SAN	CON	CAR																1
R&S, 038	Sanidinite facies, various	San	CON	CSI
R&S, 038	Sanidinite facies, various	San	CON	CSI
R&S, 042	Sanidinite facies, various	San	CON	CSI
R&S, 042	Sanidinite facies, various	San	CON	CSI
R&S, 042	Sanidinite facies, various	SAN	CON	CAR																1
R&S, 051	Pyroxene hornfels facies, various	PyxHn	CON	PEL																						1										1
R&S, 055	Sanidinite facies, various	San	CON	CAR																1
R&S, 055	Sanidinite facies, various	San	CON	CAR																1
R&S, 055	Sanidinite facies, various	San	CON	CAR																1
R&S, 055	Sanidinite facies, various	San	CON	CAR																1
R&S, 056	Pyroxene hornfels facies, various	PyxHn	CON	PEL																											1										1
R&S, 056	Pyroxene hornfels facies, various	PyxHn	CON	PEL																																					1
R&S, 056	Pyroxene hornfels facies, various	PyxHn	CON	PEL			1																								1
R&S, 056	Pyroxene hornfels facies, various	PyxHn	CON	PEL																											1
R&S, 056	Pyroxene hornfels facies, various	PyxHn	CON	CSI												1
R&S, 056	Pyroxene hornfels facies, various	PyxHn	CON	PEL																											1																		1
R&S, 057	Sanidinite facies, marble, various	San	CON	CAR																1
R&S, 057	Pyroxene hornfels facies, Marble, various	PyxHn	CON	CAR																1																					1
R&S, 057	Sanidinite facies, marble, various	San	CON	CAR																1
R&S, 057	Sanidinite facies, marble, various	San	CON	CAR																1
R&S, 057	Sanidinite facies, marble, various	San	CON	CAR																1
R&S, 057	Sanidinite facies, marble, various	San	CON	CAR
R&S, 057	Sanidinite facies, marble, various	San	CON	CAR																1
R&S, 057	Sanidinite facies, marble, various	San	CON	CAR																1
R&S, 061	Pyroxene hornfels facies, Marble, various	PyxHn	CON	CAR
R&S, 061	Pyroxene hornfels facies, Marble, various	PyxHn	CON	CAR																1
R&S, 061	Pyroxene hornfels facies, Marble, various	PyxHn	CON	CAR																1
R&S, 062	Pyroxene hornfels facies, Marble, various	PyxHn	CON	CAR																1																1					1
R&S, 062	Pyroxene hornfels facies, Pelitic various	PyxHn	CON	PEL																																						1
R&S, 062	Pyroxene hornfels facies, Pelitic various	PyxHn	CON	PEL																											1
R&S, 062	Pyroxene hornfels facies, Pelitic various	PyxHn	CON	PEL																											1
R&S, 062	Pyroxene hornfels facies, Pelitic various	PyxHn	CON	PEL						1
R&S, 062	Pyroxene hornfels facies, Pelitic various	PyxHn	CON	PEL																											1
R&S, 064	Sanidinite facies, marble, Eifel	San	XEN	CAR
R&S, 064	Sanidinite facies, marble, Eifel	San	XEN	CAR
R&S, 064	Sanidinite facies, marble, Eifel	San	XEN	CAR																											1										1
R&S, 064	Sanidinite facies, marble, Eifel	San	XEN	CAR																1
R&S, 064	Sanidinite facies, marble, Israel	San	XEN	CAR															1
R&S, 064	Sanidinite facies, marble, Israel	San	XEN	CAR
R&S, 064	Sanidinite facies, marble, Eifel	San	XEN	CAR
R&S, 065	Sanidinite facies, marble, Texas	San	CON	CAR																1
R&S, 066	Sanidinite facies, marble, Gavasaya, Bulgaria	San	CON	CAR
R&S, 072	Sanidinite facies, marble, Ackland, NZ	San	XEN	CAR																						1
R&S, 072	Sanidinite facies, marble, Ackland, NZ	San	XEN	CAR																											1												1
R&S, 072	Sanidinite facies, pelite, Mull, Scotland	San	XEN	PEL																						1
R&S, 072	Sanidinite facies, pelite, Mull, Scotland	San	XEN	PEL												1										1
R&S, 072	Sanidinite facies, pelite, Mull, Scotland	San	XEN	PEL																						1																							1
R&S, 072	Sanidinite facies, pelite, Mull, Scotland	San	XEN	PEL								1															1
R&S, 072	Sanidinite facies, pelite, Mull, Scotland	San	XEN	PEL																						1	1
R&S, 072	Sanidinite facies, marble, Ackland, NZ	San	XEN	CAR																						1
R&S, 072	Sanidinite facies, pelite, Mull, Scotland	San	XEN	PEL														1																															1
R&S, 072	Sanidinite facies, marble, Ackland, NZ	San	XEN	CAR																						1
R&S, 072	Sanidinite facies, pelite, Mull, Scotland	San	XEN	PEL								1				1
R&S, 072	Sanidinite facies, marble, Ackland, NZ	San	XEN	CAR
R&S, 072	Sanidinite facies, pelite, Mull, Scotland	San	XEN	PEL								1				1
R&S, 072	Sanidinite facies, pelite, Mull, Scotland	San	XEN	PEL												1
R&S, 072	Sanidinite facies, marble, Ackland, NZ	San	XEN	CAR
R&S, 072	Sanidinite facies, marble, Ackland, NZ	San	XEN	CAR								1														1
R&S, 073	Hornfels facies, laterite, Cushendall, Ireland	PyxHn	XEN	MAF												1																					1										1
R&S, 073	Hornfels facies, laterite, Cushendall, Ireland	PyxHn	XEN	LAT																						1																		1			1
R&S, 073	Hornfels facies, laterite, Cushendall, Ireland	PyxHn	XEN	LAT																																								1			1
R&S, 073	Hornfels facies, laterite, Cushendall, Ireland	PyxHn	XEN	LAT																						1																					1
R&S, 073	Hornfels facies, bauxite, Cushendall, Ireland	PyxHn	XEN	BAU																																							1
R&S, 073	Sanidinite facies, pelite, Mull, Scotland	San	XEN	PEL																							1
R&S, 073	Sanidinite facies, pelite, Mull, Scotland	San	XEN	PEL																						1																							1
R&S, 073	Sanidinite facies, pelite, Mull, Scotland	San	XEN	PEL								1															1
R&S, 073	Hornfels facies, laterite, Cushendall, Ireland	PyxHn	XEN	MAF																																											1
R&S, 073	Hornfels facies, laterite, Cushendall, Ireland	PyxHn	XEN	MAF																						1
R&S, 073	Hornfels facies, laterite, Cushendall, Ireland	PyxHn	XEN	LAT																							1																	1			1
R&S, 073	Hornfels facies, laterite, Cushendall, Ireland	PyxHn	XEN	LAT																							1																	1			1
R&S, 073	Hornfels facies, bauxite, Cushendall, Ireland	PyxHn	XEN	BAU																							1																1
R&S, 073	Hornfels facies, bauxite, Cushendall, Ireland	PyxHn	XEN	BAU																							1																1
R&S, 074	Hornfels facies, pelite, Strachur, Scotland	PyxHn	XEN	PEL																							1
R&S, 074	Hornfels facies, pelite, Strachur, Scotland	PyxHn	XEN	PEL																						1
R&S, 074	Hornfels facies, pelite, Strachur, Scotland	PyxHn	XEN	PEL																							1
R&S, 074	Hornfels facies, pelite, Strachur, Scotland	PyxHn	XEN	PEL																							1
R&S, 074	Hornfels facies, pelite, Strachur, Scotland	PyxHn	XEN	PEL
R&S, 074	Hornfels facies, pelite, Strachur, Scotland	PyxHn	XEN	PEL																							1
R&S, 076	Hornfels facies, pelite, Barrow Hills, England	PyxHn	XEN	PEL						1																1
R&S, 076	Hornfels facies, pelite, Barrow Hills, England	PyxHn	XEN	PEL														1
R&S, 076	Hornfels facies, pelite, Barrow Hills, England	PyxHn	XEN	PEL						1																1																					1
R&S, 076	Hornfels facies, pelite, Barrow Hills, England	PyxHn	XEN	PEL																						1
R&S, 076	Hornfels facies, pelite, Barrow Hills, England	PyxHn	XEN	PEL						1								1
[truncated: 789 more rows]
[truncated: 49 more columns]
