# Supplementary material for: An evolutionary system of mineralogy, Part VIII: The evolution of metamorphic minerals
Source: publisher site journal article supplement (doi:10.2138/am-2023-9004), 2024-02-07
Supplement: Supplementary file 5 [file 9004_supp_Table 4 Read Me File.pdf › am-2023-9004_sm/9004_supp_Table 4 Read Me File.pdf]

## **Supplementary Read-Me File: Instructions for Supplementary Table 4**

### **An evolutionary system of mineralogy, Part VIII: The evolution of the metamorphic minerals**

**SHAUNNA M. MORRISON, ANIRUDH PRABHU, AND ROBERT M. HAZEN**

Supplementary Table 4 is an csv file that records the frequency of coexistence of 94 of the most commonly encountered metamorphic minerals. This file is thus a diagonally-symmetric 94 x 94 matrix.

Column A and Row 1 indicate the 94 names of metamorphic mineral kinds listed in alphabetical order.

In this matrix, diagonal elements indicate the total number of occurrences of the mineral: thus, matrix element B2 reveals that the mineral *actinolite* occurs in 74 modes in Supplementary Table 3. Off-diagonal matrix elements indicate the number of rocks in which pairs of minerals coexist. Thus, matrix element D2 reveals that *actinolite* and *albite* coexist in 20 rocks in Supplementary Table 3. Similarly, matrix element J2 indicates that *actinolite* and *anthophyllite* were not reported to coexist in any of the 2785 rocks tabulated in Supplementary Table 3.
